# Supplementary material
Source: publisher figshare collection journal article supplement (https://acs.figshare.com/ndownloader/files/4485253)

## Supporting Information

### **Stereoselective Synthesis of Highly Functionalized $\alpha$ -Diazo- $\beta$ -ketoalkanoates via Catalytic One-pot Mukaiyama-Aldol Reactions**

**Lei Zhou and Michael P. Doyle\***

*Department of Chemistry and Biochemistry, University of Maryland, College Park,  
Maryland 20742*

#### **Table of Contents**

|                                                          |               |
|----------------------------------------------------------|---------------|
| <b>General</b>                                           | <b>S2</b>     |
| <b>General Procedure for Synthesis of 3</b>              | <b>S2-6</b>   |
| <b>Low Temperature <math>^1\text{H}</math> NMR Study</b> | <b>S6</b>     |
| <b>Procedure for Synthesis of 4</b>                      | <b>S6</b>     |
| <b>General Procedure for Synthesis of 5</b>              | <b>S6-7</b>   |
| <b>General Procedure for Synthesis of 6</b>              | <b>S7-9</b>   |
| <b>Procedure for Synthesis of 7</b>                      | <b>S9</b>     |
| <b>NMR spectra of New Compounds</b>                      | <b>S10-55</b> |



**General.** Reactions were performed in oven-dried (140 °C) or flame-dried glassware under an atmosphere of dry N<sub>2</sub>. Dichloromethane (DCM) was passed through a solvent column prior to use and was not distilled. Methanol was not distilled. Thin layer chromatography (TLC) was carried out using EM Science silica gel 60 F<sub>254</sub> plates. The developed chromatogram was analyzed by UV lamp (254 nm). Liquid chromatography was performed using flash chromatography of the indicated system on silica gel (230-400 mesh). Metal triflate salts were purchased from Aldrich and used as received. <sup>1</sup>H NMR and <sup>13</sup>C NMR spectra were recorded in CDCl<sub>3</sub> on a Bruker Avance 400 MHz spectrometer. Chemical shifts were reported in ppm with the solvent signals as reference, and coupling constants (*J*) were given in Hertz. IR spectra were recorded on a Jasco FTIR 4100 spectrometer. Mass spectra were obtained with a JEOL AccuTOF-CS spectrometer.

**General Procedure for Synthesis of 3 (Tables 1 and 2).** To a flame-dried vial under a dry nitrogen atmosphere were added zinc triflate (11.0 mg, 3.0 mol%) and 5.0 mL of dry DCM. Methyl diazoacetoacetate **2** (142 mg, 1.00 mmol, 1.00 eq.), 2,6-lutidine (383 μL, 3.30 eq.), and aldehyde (1.10 mmol, 1.10 eq.) were added sequentially to the above mixture. The mixture was cooled to – 78 °C in a dry ice-acetone bath. *tert*-Butyldimethylsilyl trifluoromethanesulfonate (TBSOTf, 287 μL, 1.25 eq.) was then added dropwise. The mixture was stirred at – 78 °C then warmed to room temperature over 16 h after which the reaction was complete as monitored by TLC. After evaporation of the solvent under reduced pressure, the crude product was purified by flash column chromatography on silica gel using 5:1(v/v) hexanes:ethyl acetate as eluent to give pure compound **3** in high yield. Diazo carbon was not detected in <sup>13</sup>C NMR unless stated otherwise.

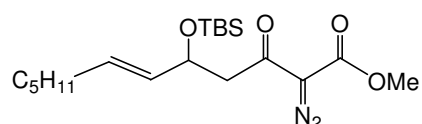

**3a.** Yellow oil, 73% yield. <sup>1</sup>H NMR (400 MHz, CDCl<sub>3</sub>): δ 5.55-5.61 (m, 1H), 5.39-5.45 (m, 1H), 4.56-4.61 (m, 1H), 3.80 (s, 3H), 3.21 (dd, 1H, *J* = 14.8, 8.0 Hz), 2.82 (dd, 1H, *J* = 14.8, 5.2 Hz), 1.94-2.02 (m, 2H), 1.19-1.36 (m, 9H), 0.82 (s, 9H), -0.01 (s, 6H); <sup>13</sup>C NMR (100 MHz, CDCl<sub>3</sub>): δ 190.8, 161.9, 132.6, 131.7, 71.0, 52.4, 48.5, 32.2, 31.6, 29.0, 26.0, 22.7, 18.3, 14.2, -4.1, -4.8; HRMS (ESI) for C<sub>19</sub>H<sub>35</sub>N<sub>2</sub>O<sub>4</sub>Si [M+H]<sup>+</sup> calcd: 383.2366; found: 383.2345; IR (neat): 2955, 2928, 2856, 2132, 1724, 1656 cm<sup>-1</sup>.

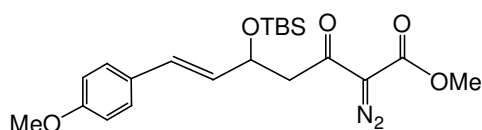

**3b.** Yellow oil, 90% yield. <sup>1</sup>H NMR (400 MHz, CDCl<sub>3</sub>): δ 7.26 (d, 2H, *J* = 8.8 Hz),



6.83 (d, 2H,  $J = 8.8$  Hz), 6.46 (d, 1H,  $J = 15.6$  Hz), 6.07 (dd, 1H,  $J = 15.6, 6.8$  Hz), 4.81-4.86 (m, 1H,  $J = 7.6, 6.4$  Hz), 3.82 (s, 3H), 3.78 (s, 3H), 3.32 (dd, 1H,  $J = 14.8, 8.0$  Hz), 2.96 (dd, 1H,  $J = 14.8, 5.2$  Hz), 0.84 (s, 9H), 0.03 (s, 3H), 0.02 (s, 3H);  $^{13}\text{C}$  NMR (100 MHz,  $\text{CDCl}_3$ ):  $\delta$  190.5, 161.9, 159.4, 130.1, 129.7, 129.4, 127.9, 114.2, 71.0, 55.5, 52.4, 48.5, 25.9, 18.3, -4.1, -4.8; HRMS (ESI) for  $\text{C}_{21}\text{H}_{31}\text{N}_2\text{O}_5\text{Si}$   $[\text{M}+\text{H}]^+$  calcd: 419.2002; found: 419.2057; IR (neat): 2955, 2142, 1722, 1631  $\text{cm}^{-1}$ .

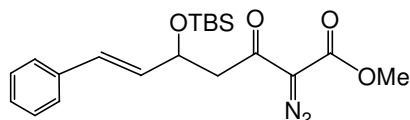

**3c.** Light yellow oil, 94% yield.  $^1\text{H}$  NMR (400 MHz,  $\text{CDCl}_3$ ):  $\delta$  7.19-7.31 (m, 5H), 6.54 (d, 1H,  $J = 15.6$  Hz), 6.21 (dd, 1H,  $J = 15.6, 6.8$  Hz), 4.81-4.86 (m, 1H,  $J = 7.6, 6.4$  Hz), 3.82 (s, 3H), 3.32 (dd, 1H,  $J = 14.8, 8.0$  Hz), 2.96 (dd, 1H,  $J = 14.8, 5.2$  Hz), 0.84 (s, 9H), 0.04 (s, 3H), 0.03 (s, 3H);  $^{13}\text{C}$  NMR (100 MHz,  $\text{CDCl}_3$ ):  $\delta$  190.4, 161.8, 137.0, 132.3, 129.9, 128.8, 127.6, 126.7, 70.7, 52.4, 48.4, 25.9, 18.3, -4.1, -4.8; HRMS (ESI) for  $\text{C}_{20}\text{H}_{28}\text{N}_2\text{NaO}_4\text{Si}$   $[\text{M}+\text{Na}]^+$  calcd: 411.1716; found: 411.1697; IR (neat): 2955, 2856, 2136, 1722, 1650  $\text{cm}^{-1}$ .

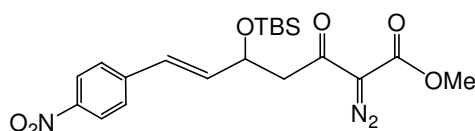

**3d.** Yellow oil, 98% yield.  $^1\text{H}$  NMR (400 MHz,  $\text{CDCl}_3$ ):  $\delta$  8.14 (d, 2H,  $J = 8.8$  Hz), 7.46 (d, 2H,  $J = 8.8$  Hz), 6.66 (d, 1H,  $J = 16.0$  Hz), 6.45 (dd, 1H,  $J = 16.0, 6.0$  Hz), 4.87-4.89 (m, 1H,  $J = 5.6, 6.0$  Hz), 3.82 (s, 3H), 3.32 (dd, 1H,  $J = 15.6, 7.2$  Hz), 3.01 (dd, 1H,  $J = 15.6, 5.6$  Hz), 0.84 (s, 9H), 0.03 (s, 3H), 0.02 (s, 3H);  $^{13}\text{C}$  NMR (100 MHz,  $\text{CDCl}_3$ ):  $\delta$  190.0, 161.8, 147.1, 143.5, 137.3, 127.7, 127.2, 124.2, 69.9, 52.5, 48.2, 25.9, 18.3, -4.3, -4.8; HRMS (ESI) for  $\text{C}_{20}\text{H}_{28}\text{N}_3\text{O}_6\text{Si}$   $[\text{M}+\text{H}]^+$  calcd: 434.1747; found: 434.1784; IR (neat): 2954, 2930, 2856, 2133, 1720, 1651, 1517, 1340  $\text{cm}^{-1}$ .

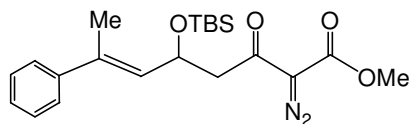

**3e.** Yellow oil, 95% yield.  $^1\text{H}$  NMR (400 MHz,  $\text{CDCl}_3$ ):  $\delta$  7.17-7.33 (m, 5H), 6.48 (s, 1H), 4.70-4.73 (m, 1H,  $J = 8.8, 3.6$  Hz), 3.82 (s, 3H), 3.46 (dd, 1H,  $J = 14.4, 9.2$  Hz), 2.96 (dd, 1H,  $J = 14.4, 4.0$  Hz), 1.87 (s, 1H), 0.84 (s, 9H), 0.03 (s, 3H), 0.02 (s, 3H);  $^{13}\text{C}$  NMR (100 MHz,  $\text{CDCl}_3$ ):  $\delta$  190.8, 161.9, 140.0, 137.8, 129.1, 128.3, 126.6, 126.0, 75.8, 52.4, 46.7, 25.9, 18.3, 13.4, -4.5, -5.1; HRMS (ESI) for  $\text{C}_{21}\text{H}_{30}\text{N}_2\text{NaO}_4\text{Si}$   $[\text{M}+\text{Na}]^+$  calcd: 425.1873; found: 425.1839; IR (neat): 2954, 2929, 2132, 1722, 1655  $\text{cm}^{-1}$ .



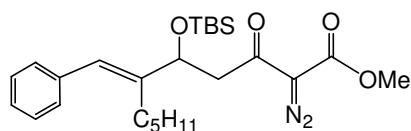

**3f.** Yellow oil, 92% yield.  $^1\text{H}$  NMR (400 MHz,  $\text{CDCl}_3$ ):  $\delta$  7.17-7.32 (m, 5H), 6.58 (s, 1H), 4.72-4.74 (dd, 1H,  $J = 9.2, 2.4$  Hz), 3.81 (s, 3H), 3.39 (dd, 1H,  $J = 14.8, 9.2$  Hz), 2.86 (dd, 1H,  $J = 14.8, 3.2$  Hz), 2.32-2.40 (m, 1H), 2.02-2.12 (m, 1H), 1.22-1.56 (m, 9H), 0.84 (s, 9H), 0.03 (s, 3H), 0.02 (s, 3H);  $^{13}\text{C}$  NMR (100 MHz,  $\text{CDCl}_3$ ):  $\delta$  190.9, 161.9, 144.8, 138.1, 129.9, 129.0, 128.7, 128.4, 126.5, 126.0, 73.6, 52.4, 47.9, 32.5, 28.9, 28.6, 26.0, 22.6, 18.3, 14.2, -4.2, -5.0; HRMS (ESI) for  $\text{C}_{25}\text{H}_{38}\text{N}_2\text{NaO}_4\text{Si}$   $[\text{M}+\text{Na}]^+$  calcd: 481.2499; found: 481.2472; IR (neat): 2954, 2929, 2132, 1723, 1656  $\text{cm}^{-1}$ .

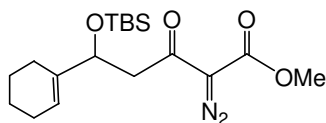

**3g.** Light yellow oil, 89% yield.  $^1\text{H}$  NMR (400 MHz,  $\text{CDCl}_3$ ):  $\delta$  5.61 (s, 1H), 4.51 (dd, 1H,  $J = 9.0, 4.0$  Hz), 3.82 (s, 3H), 3.38 (dd, 1H,  $J = 14.0, 9.0$  Hz), 2.68 (dd, 1H,  $J = 14.0, 4.0$  Hz), 1.47-1.97 (m, 8H), 0.80 (s, 9H), -0.03 (s, 3H), -0.04 (s, 3H);  $^{13}\text{C}$  NMR (100 MHz,  $\text{CDCl}_3$ ):  $\delta$  190.2, 161.9, 140.0, 123.4, 74.6, 52.4, 46.6, 25.9, 25.2, 23.2, 22.8, 18.2, -4.5, -5.1; HRMS (ESI) for  $\text{C}_{18}\text{H}_{30}\text{N}_2\text{NaO}_4\text{Si}$   $[\text{M}+\text{Na}]^+$  calcd: 389.1873; found: 389.1872; IR (neat): 2929, 2132, 1723, 1657  $\text{cm}^{-1}$ .

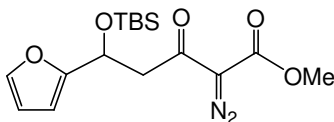

**3h.** Yellow oil, 82% yield.  $^1\text{H}$  NMR (400 MHz,  $\text{CDCl}_3$ ):  $\delta$  7.32 (d, 1H,  $J = 1.6$  Hz), 6.27 (dd, 1H,  $J = 3.0, 1.6$  Hz), 6.20 (d, 1H,  $J = 3.0$  Hz), 5.27 (dd, 1H,  $J = 8.8, 4.8$  Hz), 3.82 (s, 3H), 3.60 (dd, 1H,  $J = 16.0, 8.8$  Hz), 3.12 (dd, 1H,  $J = 16.0, 4.8$  Hz), 0.80 (s, 9H), 0.01 (s, 3H), -0.11 (s, 3H);  $^{13}\text{C}$  NMR (100 MHz,  $\text{CDCl}_3$ ):  $\delta$  189.9, 161.8, 156.2, 110.3, 106.4, 65.1, 52.5, 46.9, 25.8, 18.2, -4.8, -5.1; HRMS (ESI) for  $\text{C}_{16}\text{H}_{24}\text{N}_2\text{NaO}_5\text{Si}$   $[\text{M}+\text{Na}]^+$  calcd: 375.1352; found: 375.1331; IR (neat): 2955, 2133, 1719, 1656  $\text{cm}^{-1}$ .

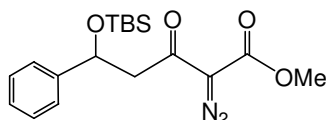

**3i.** Pale yellow oil, 93% yield.  $^1\text{H}$  NMR (400 MHz,  $\text{CDCl}_3$ ):  $\delta$  7.20-7.29 (m, 5H), 5.20 (dd, 1H,  $J = 9.0, 4.0$  Hz), 3.81 (s, 3H), 3.49 (dd, 1H,  $J = 14.6, 9.0$  Hz), 2.92 (dd, 1H,  $J = 14.6, 4.0$  Hz), 0.80 (s, 9H), -0.04 (s, 3H), -0.22 (s, 3H);  $^{13}\text{C}$  NMR (100 MHz,  $\text{CDCl}_3$ ):  $\delta$  190.6, 161.8, 144.6, 128.4, 127.6, 126.2, 72.2, 52.4, 50.7, 25.8, 18.2, -4.6, -5.1; HRMS (ESI) for  $\text{C}_{18}\text{H}_{27}\text{N}_2\text{O}_4\text{Si}$   $[\text{M}+\text{H}]^+$  calcd: 363.1740; found: 363.1730; IR (neat): 2954, 2131, 1721, 1656  $\text{cm}^{-1}$ .



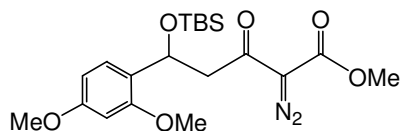

**3j.** Light yellow oil, 95% yield.  $^1\text{H}$  NMR (400 MHz,  $\text{CDCl}_3$ ):  $\delta$  7.43 (d, 1H,  $J = 8.4$  Hz), 6.50 (dd, 1H,  $J = 8.4, 2.4$  Hz), 6.41 (d, 1H,  $J = 2.4$  Hz), 5.20 (dd, 1H,  $J = 8.8, 3.2$  Hz), 3.84 (s, 3H), 3.82 (s, 3H), 3.81 (s, 3H), 3.58 (dd, 1H,  $J = 14.8, 9.2$  Hz), 2.84 (dd, 1H,  $J = 14.8, 4.0$  Hz), 0.85 (s, 9H), 0.02 (s, 3H), -0.14 (s, 3H);  $^{13}\text{C}$  NMR (100 MHz,  $\text{CDCl}_3$ ):  $\delta$  190.6, 161.7, 159.9, 156.3, 127.8, 125.1, 104.1, 97.8, 65.5, 55.2, 52.1, 48.6, 25.7, 18.0, -4.9, -5.4; HRMS (ESI) for  $\text{C}_{20}\text{H}_{30}\text{N}_2\text{NaO}_6\text{Si}$   $[\text{M}+\text{Na}]^+$  calcd: 445.1771; found: 445.1724; IR (neat): 2955, 2131, 1722  $\text{cm}^{-1}$ .

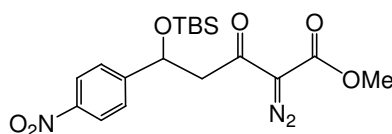

**3k.** Yellow solid, 96% yield.  $^1\text{H}$  NMR (400 MHz,  $\text{CDCl}_3$ ):  $\delta$  8.17 (d, 1H,  $J = 8.8$  Hz), 7.58 (d, 1H,  $J = 8.8$  Hz), 5.34 (dd, 1H,  $J = 8.4, 4.4$  Hz), 3.82 (s, 3H), 3.45 (dd, 1H,  $J = 15.2, 8.4$  Hz), 3.03 (dd, 1H,  $J = 15.2, 4.4$  Hz), 0.84 (s, 9H), 0.00 (s, 3H), -0.17 (s, 3H);  $^{13}\text{C}$  NMR (100 MHz,  $\text{CDCl}_3$ ):  $\delta$  189.3, 161.5, 151.8, 147.2, 126.8, 123.6, 70.8, 52.2, 50.1, 25.6, 17.9, -4.9, -5.3; HRMS (ESI) for  $\text{C}_{18}\text{H}_{26}\text{N}_3\text{O}_6\text{Si}$   $[\text{M}+\text{H}]^+$  calcd: 408.1591; found: 408.1589; IR (neat): 2954, 2134, 1713, 1646, 1514, 1344  $\text{cm}^{-1}$ .

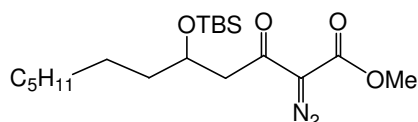

**3l.** Pale yellow oil, 90% yield.  $^1\text{H}$  NMR (400 MHz,  $\text{CDCl}_3$ ):  $\delta$  4.22-4.25 (m, 1H), 3.85 (s, 3H), 3.18 (dd, 1H,  $J = 15.2, 7.2$  Hz), 2.87 (dd, 1H,  $J = 15.2, 5.2$  Hz), 1.48-1.51 (m, 2H), 1.29-1.35 (m, 10H), 0.90 (t, 3H,  $J = 6.8$  Hz), 0.89 (s, 9H), 0.06 (s, 3H), 0.01 (s, 3H);  $^{13}\text{C}$  NMR (100 MHz,  $\text{CDCl}_3$ ):  $\delta$  191.2, 161.6, 69.2, 52.1, 47.1, 37.9, 31.8, 29.6, 29.2, 25.7, 24.9, 22.6, 17.9, 14.1, -4.6, -4.9; HRMS (ESI) for  $\text{C}_{19}\text{H}_{37}\text{N}_2\text{O}_4\text{Si}$   $[\text{M}+\text{H}]^+$  calcd: 385.2523; found: 385.2494; IR (neat): 2925, 2135, 1722, 1648  $\text{cm}^{-1}$ .

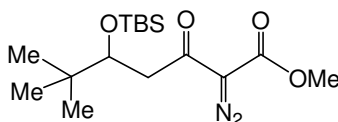

**3m.** Pale yellow oil, 89% yield.  $^1\text{H}$  NMR (400 MHz,  $\text{CDCl}_3$ ):  $\delta$  4.08 (t, 1H,  $J = 5.2$  Hz), 3.86 (s, 3H), 3.05 (d, 1H,  $J = 5.2$  Hz), 0.89 (s, 9H), 0.88 (s, 9H), 0.08 (s, 3H), -0.05 (s, 3H);  $^{13}\text{C}$  NMR (100 MHz,  $\text{CDCl}_3$ ):  $\delta$  191.6, 161.7, 75.3, 52.1, 44.1, 35.8, 25.9, 25.7, 18.2, -4.3, -4.8; HRMS (ESI) for  $\text{C}_{16}\text{H}_{31}\text{N}_2\text{O}_4\text{Si}$   $[\text{M}+\text{H}]^+$  calcd: 343.2053; found: 343.2040; IR (neat): 2955, 2132, 1723, 1659  $\text{cm}^{-1}$ .



**Low Temperature  $^1\text{H}$  NMR Study.** To a flame-dried vial under nitrogen atmosphere were added methyl diazoacetoacetate **2** (20.0 mg, 1.00 mmol, 1.00 eq.), 2,6-lutidine (45.0  $\mu\text{L}$ , 3.00 eq.), and 1.5 mL of dry  $\text{CDCl}_3$  at room temperature. The mixture was cooled to  $-78\text{ }^\circ\text{C}$ . TBSOTf (40.0  $\mu\text{L}$ , 1.25 eq.) was then added dropwise to the above mixture to give a bright yellow solution. The resulting mixture was then submitted to low temperature  $^1\text{H}$  NMR ( $-74\text{ }^\circ\text{C}$ ) after 15 min.  $^1\text{H}$  NMR showed the formation of methyl 3-*tert*-butyldimethylsilanyloxy-2-diazobu-3-enoate ( $>95\%$ ).

**Procedure for Synthesis of **4**.** Methyl 3-oxo-pentanoate (2.00 g, 1.00 eq.), methanesulfonyl azide (2.23 g, 1.20 eq.) and triethylamine (3.20 mL, 1.50 eq.) were dissolved in 50.0 mL of dry THF at room temperature under nitrogen atmosphere. The resulting colorless mixture was stirred for 16 h, during which time the mixture turned pale green. After evaporation of solvent a light yellow liquid was obtained. The yellow liquid was purified by flash column chromatography on silica gel using 5:1(v/v) hexanes:ethyl acetate as eluent to give pure compound **4** as bright yellow oil in 90% yield. The diazo carbon was not detected in  $^{13}\text{C}$  NMR.

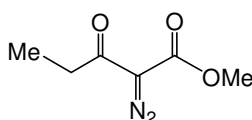

**4.**  $^1\text{H}$  NMR (400 MHz,  $\text{CDCl}_3$ ):  $\delta$  3.78 (s, 3H), 2.80 (q, 2H,  $J = 7.2\text{ Hz}$ ), 1.08 (t, 3H,  $J = 7.2\text{ Hz}$ );  $^{13}\text{C}$  NMR (100 MHz,  $\text{CDCl}_3$ ):  $\delta$  193.5, 162.0, 52.3, 33.9, 8.37; HRMS (ESI) for  $\text{C}_6\text{H}_9\text{N}_2\text{O}_3$   $[\text{M}+\text{H}]^+$  calcd: 157.0613; found: 157.0646; IR (neat): 2982, 2127, 1716, 1653  $\text{cm}^{-1}$ .

**General Procedure for Synthesis of **5** (Table 3).** To a flame-dried vial under nitrogen atmosphere were added zinc triflate (11.0 mg, 3.0 mol%) and 5 mL of dry DCM. Methyl 2-diazo-3-oxopentanoate **4** (156 mg, 1.00 mmol, 1.00 eq.), 2,6-lutidine (383  $\mu\text{L}$ , 3.30 eq.), and aldehyde (1.10 mmol, 1.10 eq.) were added to the above mixture sequentially. The mixture was cooled to  $-78\text{ }^\circ\text{C}$ . TBSOTf (287  $\mu\text{L}$ , 1.25 eq.) was then added dropwise. The mixture was stirred at  $-78\text{ }^\circ\text{C}$  and warmed to room temperature over 18 h, during which time the reaction was complete monitored by TLC. After evaporation of solvent, crude product was purified by flash column chromatography on silica gel using 5:1(v/v) hexanes:ethyl acetate as eluent to give pure compound **5** in high yield. Diazo carbon was not detected in  $^{13}\text{C}$  NMR unless stated otherwise.

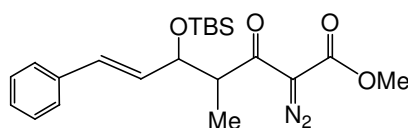



**5c.** Yellow oil, 95% yield.  $^1\text{H}$  NMR (400 MHz,  $\text{CDCl}_3$ ):  $\delta$  7.20-7.31 (m, 5H), 6.50 (d, 1H,  $J = 16.0$  Hz), 6.10 (dd, 1H,  $J = 16.0, 8.0$  Hz), 4.48 (ap t, 0.28H,  $J = 6.8$  Hz), 4.40 (ap t, 0.72H,  $J = 8.8$  Hz), 3.90-3.93 (m, 1H), 3.79 (s, 3H), 1.16 (d, 0.84H,  $J = 7.2$  Hz), 1.00 (d, 2.16H,  $J = 7.2$  Hz), 0.81 (s, 9H), 0.01 (s, 3H), -0.02 (s, 3H);  $^{13}\text{C}$  NMR (100 MHz,  $\text{CDCl}_3$ ):  $\delta$  195.7, 161.8, 136.8, 132.1, 130.7, 128.7, 127.6, 126.7, 74.9, 52.2, 47.8, 25.8, 18.1, 13.6, -4.0, -5.1; HRMS (ESI) for  $\text{C}_{21}\text{H}_{30}\text{N}_2\text{NaO}_4\text{Si}$   $[\text{M}+\text{Na}]^+$  calcd: 425.1873; found: 425.1824; IR (neat): 2954, 2140, 1723, 1655  $\text{cm}^{-1}$ .

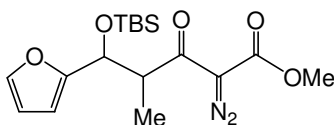

**5h.** Yellow oil, 82% yield.  $^1\text{H}$  NMR (400 MHz,  $\text{CDCl}_3$ ):  $\delta$  7.36 (d, 0.69H,  $J = 1.2$  Hz), 7.30 (d, 0.31H,  $J = 0.8$  Hz), 6.28 (dd, 0.69H,  $J = 3.2, 2.0$  Hz), 6.25 (dd, 0.31H,  $J = 3.2, 2.0$  Hz), 6.22 (d, 0.69H,  $J = 2.8$  Hz), 6.20 (d, 0.31H,  $J = 2.8$  Hz), 4.95 (d, 0.31H,  $J = 7.6$  Hz), 4.84 (d, 0.69H,  $J = 9.6$  Hz), 4.21-4.28 (m, 0.69H), 4.03-4.10 (m, 0.31H), 3.82 (s, 2.07H), 3.80 (s, 0.93H), 1.19 (d, 0.93H,  $J = 6.8$  Hz), 0.81 (d, 2.07H,  $J = 6.8$  Hz), 0.73 (s, 9H), -0.06 (s, 3H), -0.26 (s, 3H);  $^{13}\text{C}$  NMR (100 MHz,  $\text{CDCl}_3$ ):  $\delta$  196.2, 161.9, 142.0, 109.9, 108.1, 71.0, 52.2, 47.0, 25.6, 18.1, 13.4, -5.4, -5.7; HRMS (ESI) for  $\text{C}_{17}\text{H}_{26}\text{N}_2\text{NaO}_5\text{Si}$   $[\text{M}+\text{Na}]^+$  calcd: 389.1509; found: 389.1491; IR (neat): 2955, 2139, 1724, 1655  $\text{cm}^{-1}$ .

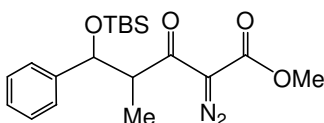

**5i.** Yellow oil, 97% yield.  $^1\text{H}$  NMR (400 MHz,  $\text{CDCl}_3$ ):  $\delta$  7.23-7.34 (m, 5H), 4.92 (d, 0.31H,  $J = 6.4$  Hz), 4.68 (d, 0.69H,  $J = 9.6$  Hz), 4.07-4.11 (m, 1H), 3.84 (s, 2.07H), 3.78 (s, 0.97H), 1.12 (d, 0.97H,  $J = 6.8$  Hz), 0.76 (d, 2.07H,  $J = 6.8$  Hz), 0.73 (s, 9H), -0.10 (s, 3H), -0.37 (s, 3H);  $^{13}\text{C}$  NMR (100 MHz,  $\text{CDCl}_3$ ):  $\delta$  196.2, 161.9, 142.9, 128.3, 127.9, 127.5, 126.9, 79.0, 52.3, 49.4, 25.6, 18.0, 13.8, -4.6, -5.3; HRMS (ESI) for  $\text{C}_{19}\text{H}_{28}\text{N}_2\text{NaO}_4\text{Si}$   $[\text{M}+\text{Na}]^+$  calcd: 399.1716; found: 399.1685; IR (neat): 2954, 2138, 1722, 1655  $\text{cm}^{-1}$ .

**General Procedure for Synthesis of 6 (Table 4).** To a flame-dried vial under nitrogen atmosphere at were added methyl 2-diazo-3-oxo-pentanoate **4** (312 mg, 2.00 mmol, 1.00 eq.), DIPEA (*N,N*-diisopropylethylamine, 0.70 mL, 2.00 eq.) and 5.0 mL of dry DCM. Di-*n*-butylboron trifluoromethanesulfonate ( $\text{Bu}_2\text{BOTf}$ , 1.0 M in DCM, 2.20 mL, 1.10 eq.) was added dropwise to the above mixture over 5 min, during which the pale yellow solution turned orange and reddish brown. The resulting mixture was stirred at 0  $^\circ\text{C}$  for 15 min, and then aldehyde (2.00 mmol, 1.00 eq.) was added. The resulting reddish brown mixture was stirred at 0  $^\circ\text{C}$  for 2-3 h, during which the reaction was complete as monitored by TLC. After evaporation of solvent, crude product was purified by flash column chromatography on silica gel using 2:1(v/v) hexanes:ethyl acetate as eluent to give pure compound **6** in good yield. Diazo



carbon was not detected in  $^{13}\text{C}$  NMR unless stated otherwise.

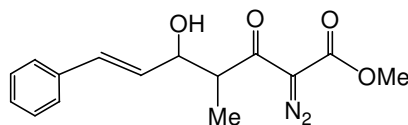

**6c.** Light yellow oil, 73% yield.  $^1\text{H}$  NMR (400 MHz,  $\text{CDCl}_3$ ):  $\delta$  7.40-7.42 (m, 2H), 7.31-7.35 (m, 2H), 7.24-7.28 (m, 1H), 6.69 (d, 1H,  $J = 16.0$  Hz), 6.21 (dd, 1H,  $J = 16.0, 5.6$  Hz), 4.69-4.72 (m, 1H), 3.87 (s, 3H), 3.79-3.85 (m, 1H), 3.11 (d, 1H,  $J = 2.8$  Hz), 1.22 (d, 3H,  $J = 7.2$  Hz);  $^{13}\text{C}$  NMR (100 MHz,  $\text{CDCl}_3$ ):  $\delta$  196.6, 161.5, 136.7, 131.1, 128.8, 128.5, 127.6, 126.5, 72.4, 52.3, 46.6, 10.7; HRMS (ESI) for  $\text{C}_{15}\text{H}_{16}\text{N}_2\text{NaO}_4$   $[\text{M}+\text{Na}]^+$  calcd: 311.1008; found: 311.1000; IR (neat): 3514, 2142, 1715, 1641  $\text{cm}^{-1}$ .

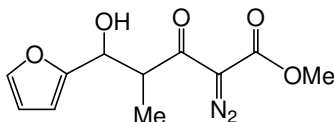

**6h.** Light yellow oil, 71% yield.  $^1\text{H}$  NMR (400 MHz,  $\text{CDCl}_3$ ):  $\delta$  7.37 (d, 1H,  $J = 1.6$  Hz), 6.34 (dd, 1H,  $J = 3.2, 1.6$  Hz), 6.31 (d, 1H,  $J = 1.6$  Hz), 5.13 (t, 1H,  $J = 4.0$  Hz), 4.00-4.06 (m, 1H), 3.87 (s, 3H), 3.15 (d, 1H,  $J = 4.0$  Hz), 1.22 (d, 3H,  $J = 6.8$  Hz);  $^{13}\text{C}$  NMR (100 MHz,  $\text{CDCl}_3$ ):  $\delta$  196.2, 161.2, 154.2, 141.8, 110.2, 106.6, 68.4, 52.4, 46.0, 11.3; HRMS (ESI) for  $\text{C}_{11}\text{H}_{13}\text{N}_2\text{O}_5$   $[\text{M}+\text{H}]^+$  calcd: 253.0824; found: 253.0859; IR (neat): 3492, 2143, 1716, 1641  $\text{cm}^{-1}$ .

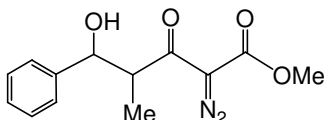

**6i.** Light yellow solid, 75% yield. Diazo carbon was detected in  $^{13}\text{C}$  NMR at 75.9 ppm.  $^1\text{H}$  NMR (400 MHz,  $\text{CDCl}_3$ ):  $\delta$  7.22-7.40 (m, 5H), 5.11 (ap s, 1H), 3.89-3.92 (m, 1H), 3.82 (s, 3H), 3.37 (d, 1H,  $J = 2.0$  Hz), 1.08 (d, 3H,  $J = 7.2$  Hz);  $^{13}\text{C}$  NMR (100 MHz,  $\text{CDCl}_3$ ):  $\delta$  196.7, 161.2, 141.6, 128.1, 127.2, 126.0, 75.9, 73.0, 52.3, 48.2, 9.9; HRMS (ESI) for  $\text{C}_{13}\text{H}_{15}\text{N}_2\text{O}_4$   $[\text{M}+\text{H}]^+$  calcd: 263.1032; found: 263.1022; IR (neat): 3485, 2952, 2130, 1709, 1631  $\text{cm}^{-1}$ .

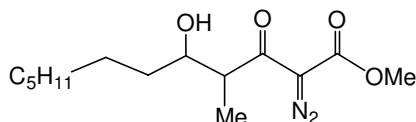

**6l.** Light yellow oil, 69% yield. Diazo carbon was detected in  $^{13}\text{C}$  NMR at 75.8 ppm.  $^1\text{H}$  NMR (400 MHz,  $\text{CDCl}_3$ ):  $\delta$  3.91-3.95 (m, 1H), 3.85 (s, 3H), 3.58-3.64 (m, 1H), 2.91 (d, 1H,  $J = 2.8$  Hz), 1.27-1.55 (m, 12H), 1.16 (d, 3H,  $J = 7.2$  Hz), 0.88 (t, 3H,  $J = 7.2$  Hz);  $^{13}\text{C}$  NMR (100 MHz,  $\text{CDCl}_3$ ):  $\delta$  197.6, 161.4, 75.8, 71.4, 52.3, 45.8, 33.9,



31.8, 29.5, 29.2, 25.6, 22.6, 14.0, 9.9; HRMS (ESI) for  $C_{14}H_{25}N_2O_4$   $[M+H]^+$  calcd: 285.1814; found: 285.1812; IR (neat): 3517, 2927, 2141, 1719, 1638  $cm^{-1}$ .

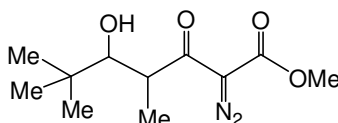

**6m.** Light yellow oil, 69% yield.  $^1H$  NMR (400 MHz,  $CDCl_3$ ):  $\delta$  3.92-3.98 (m, 1H), 3.86 (s, 3H), 3.65 (t, 1H,  $J = 4.0$  Hz), 2.54 (d, 1H,  $J = 2.8$  Hz), 1.20 (d, 3H,  $J = 7.2$  Hz), 0.97 (s, 9H);  $^{13}C$  NMR (100 MHz,  $CDCl_3$ ):  $\delta$  197.9, 161.2, 77.3, 52.2, 42.6, 35.5, 26.8, 12.3; HRMS (ESI) for  $C_{11}H_{19}N_2O_4$   $[M+H]^+$  calcd: 243.1345; found: 243.1334; IR (neat): 3529, 2956, 2140, 1717, 1634  $cm^{-1}$ .

**Procedure for Synthesis of 7.** To a refluxing green dry DCM (5.0 mL) solution of  $Rh_2(OAc)_4$  (5.0 mg, 1.0 mol%) was added a solution of compound **6i** (300 mg, 1.15 mmol) in 5.0 mL of dry DCM over 15 min under nitrogen atmosphere. After completion of the addition, the mixture was refluxed for 2 h, and then cooled to room temperature to give a greenish solution. The reaction mixture was passed through a Celite plug to remove the catalyst, which was rinsed with dry DCM. The solvent was then removed under reduced pressure and the crude product **7** was obtained as yellow oil in 96% yield.

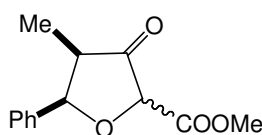

**7.** Data for the major diastereomer:  $^1H$  NMR (400 MHz,  $CDCl_3$ ):  $\delta$  7.28-7.43 (m, 5H), 5.80 (d, 0.62H,  $J = 7.2$  Hz), 5.46 (d, 0.38H,  $J = 6.0$  Hz), 4.89 (s, 0.62H), 4.68 (s, 0.38H), 3.89 (s, 1.14H), 3.86 (s, 1.86H), 2.83-2.92 (m, 0.62H), 2.77-2.82 (m, 0.38H), 0.85 (d, 1.86H,  $J = 7.2$  Hz), 0.83 (d, 1.14H,  $J = 7.2$  Hz);  $^{13}C$  NMR (100 MHz,  $CDCl_3$ ):  $\delta$  210.1, 166.9, 137.0, 128.4, 128.0, 126.3, 82.3, 79.2, 53.0, 45.6, 11.6; HRMS (ESI) for  $C_{13}H_{14}NaO_4$   $[M+Na]^+$  calcd: 257.0790; found: 257.0787; IR (neat): 2954, 1769, 1742  $cm^{-1}$ .

## NMR spectra of New Compounds.

### 3a

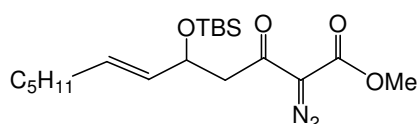



MukaiyamaAldol-3a-onepot-TBS-ZnOTf  
 pure 1,2-addition product  
 CDCl<sub>3</sub> 021109

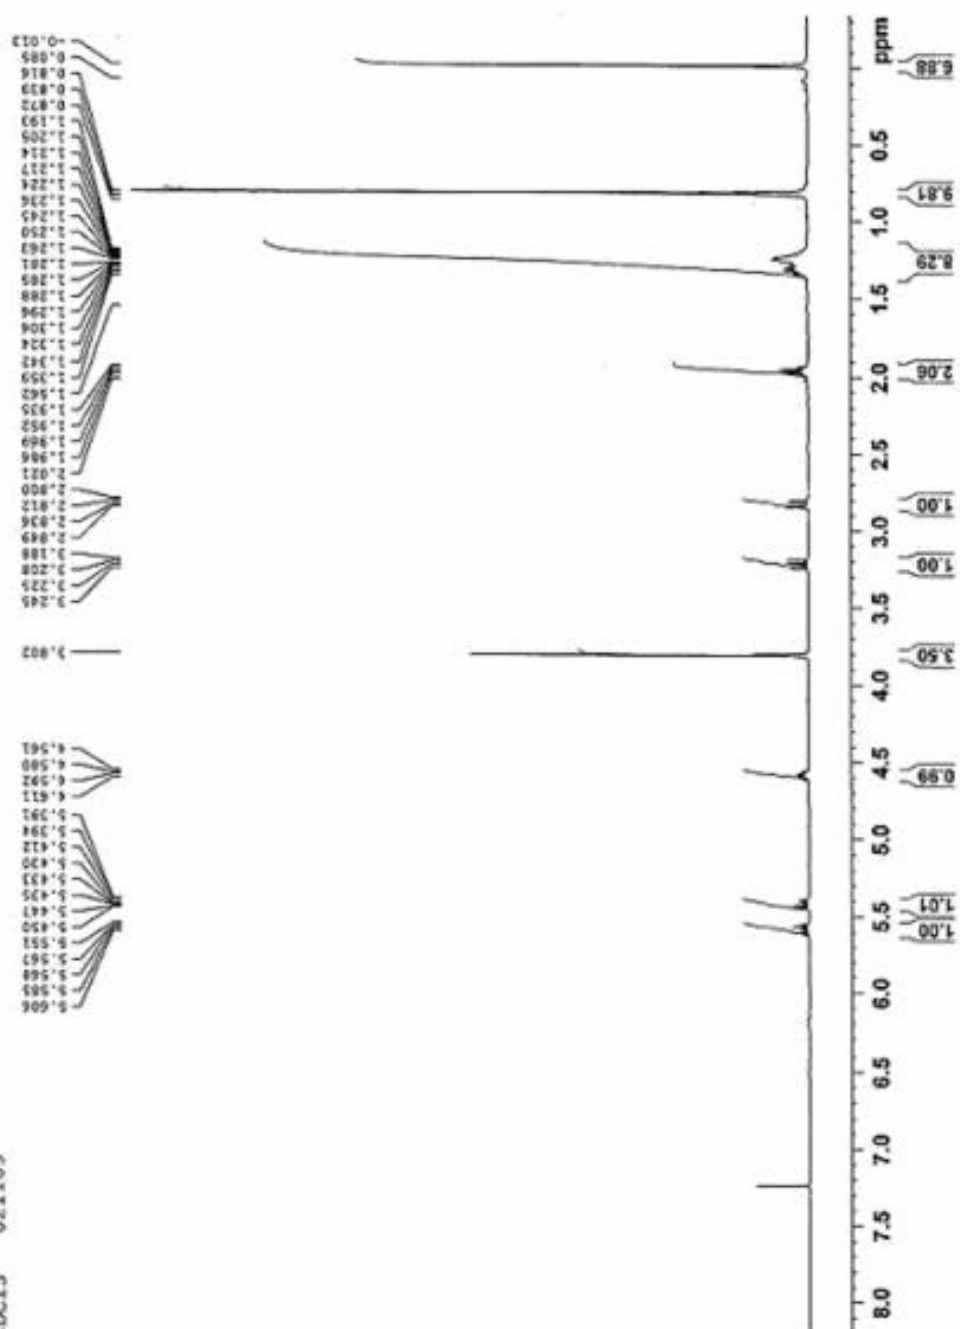



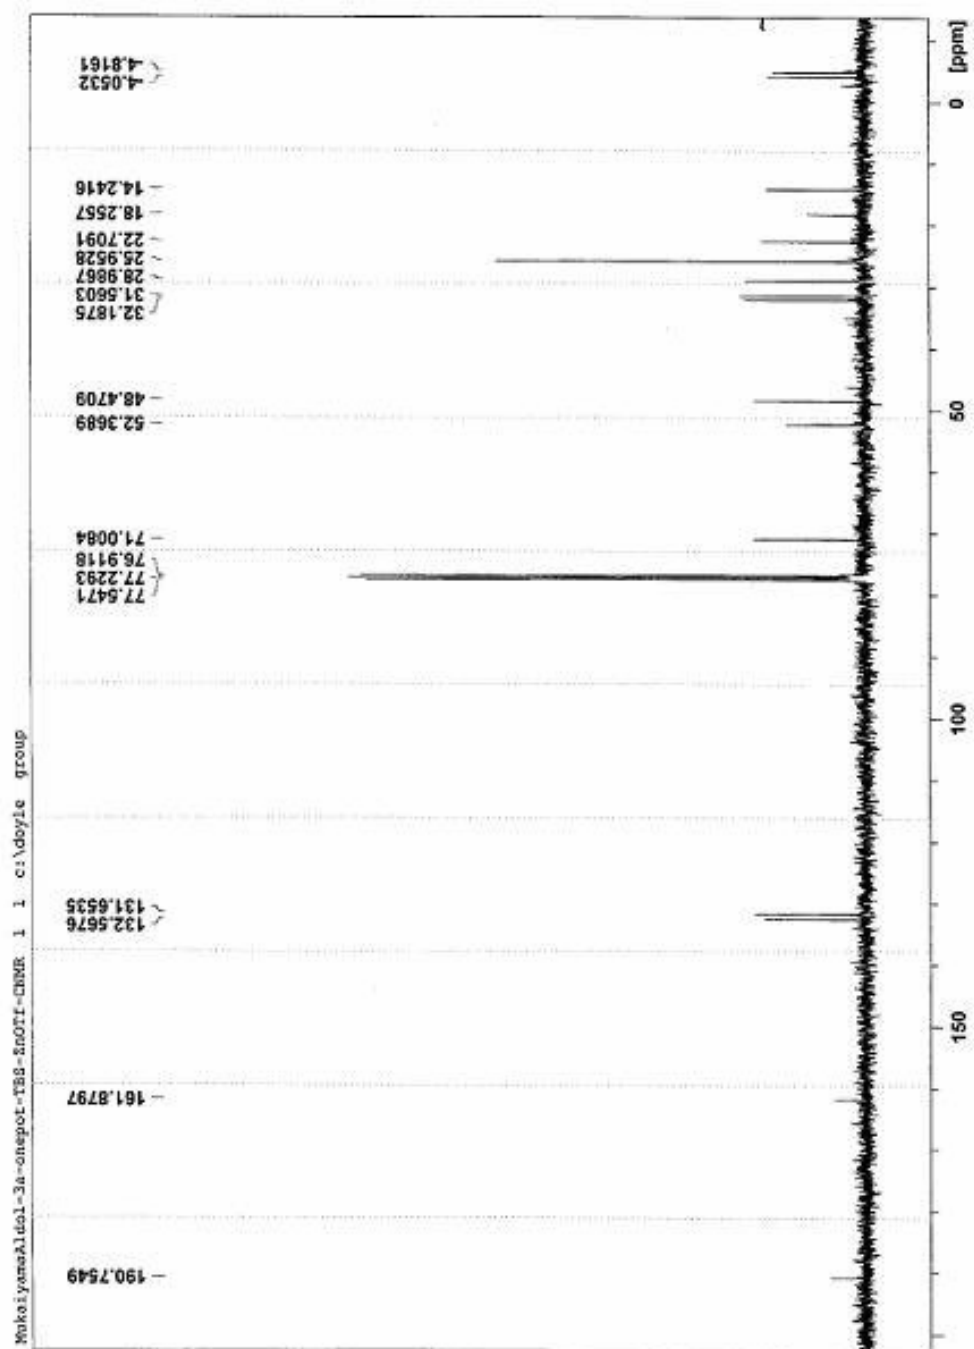



3b

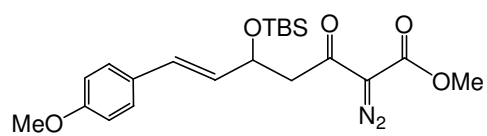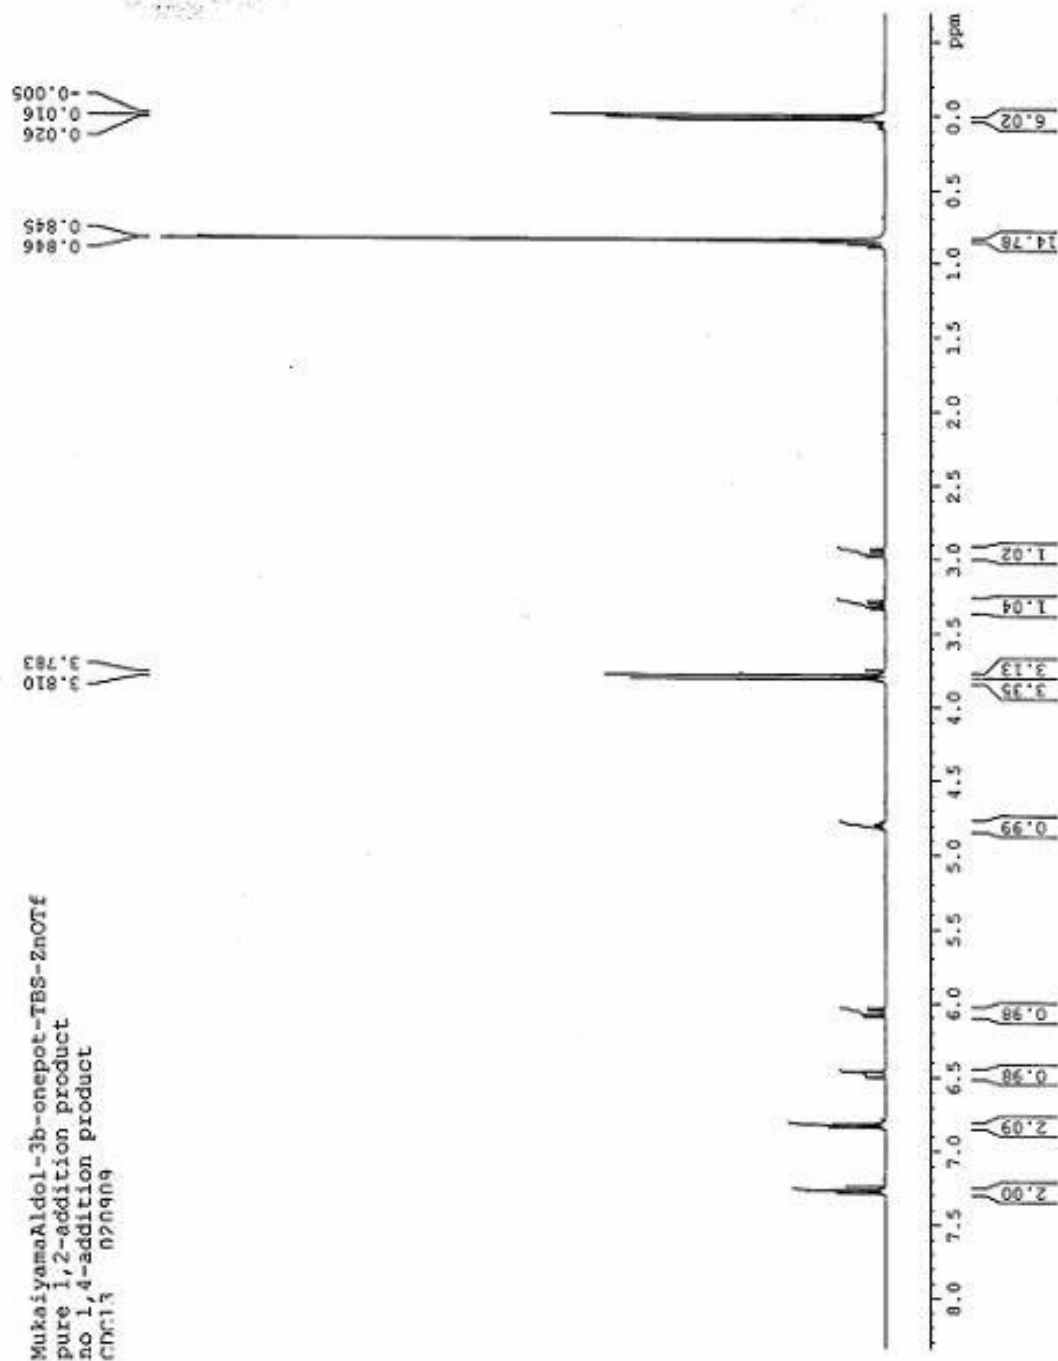



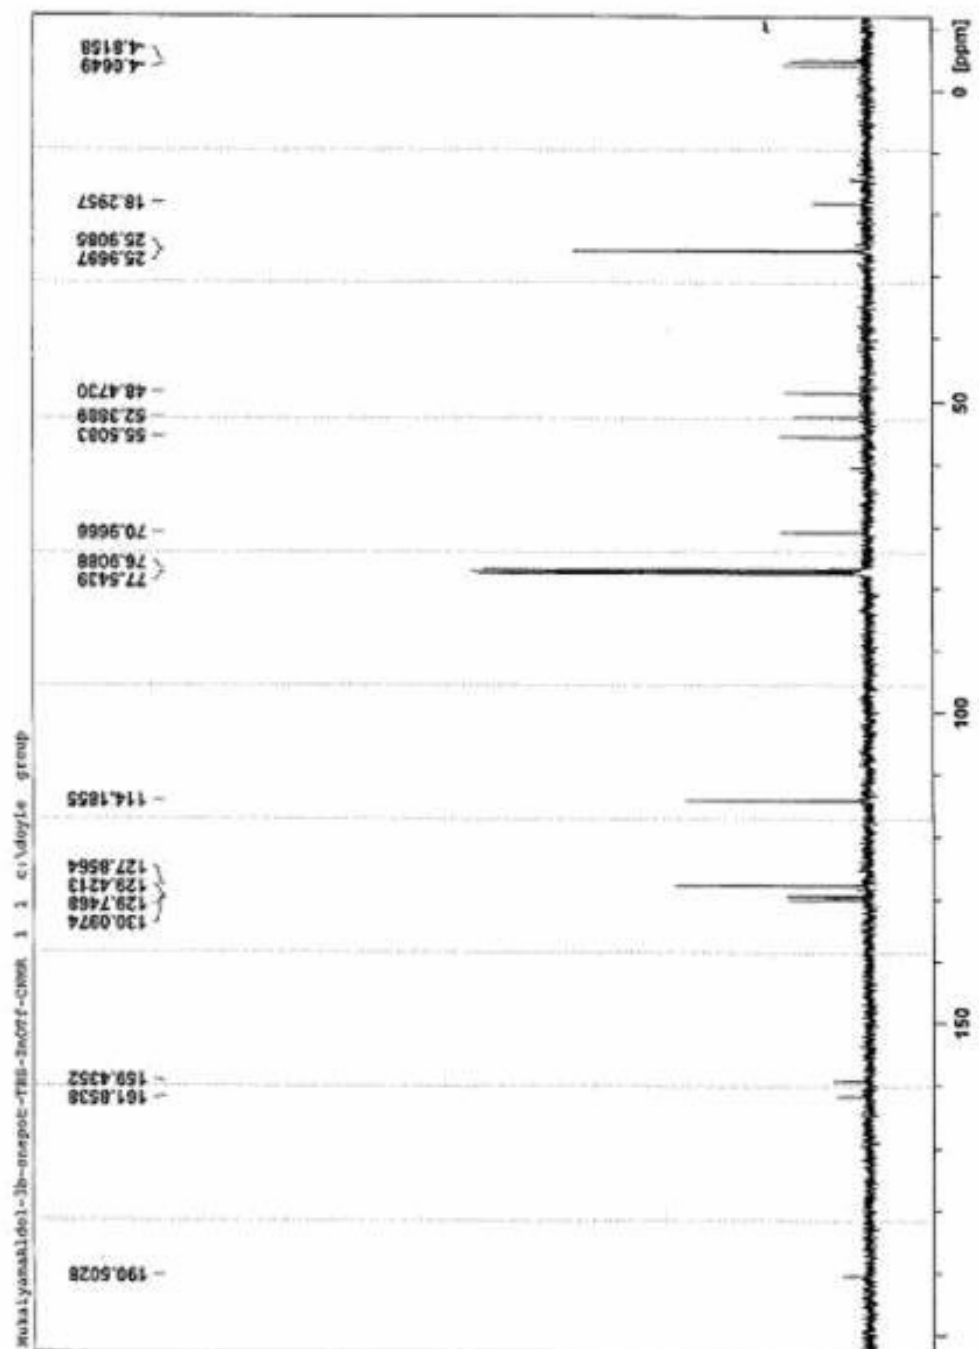







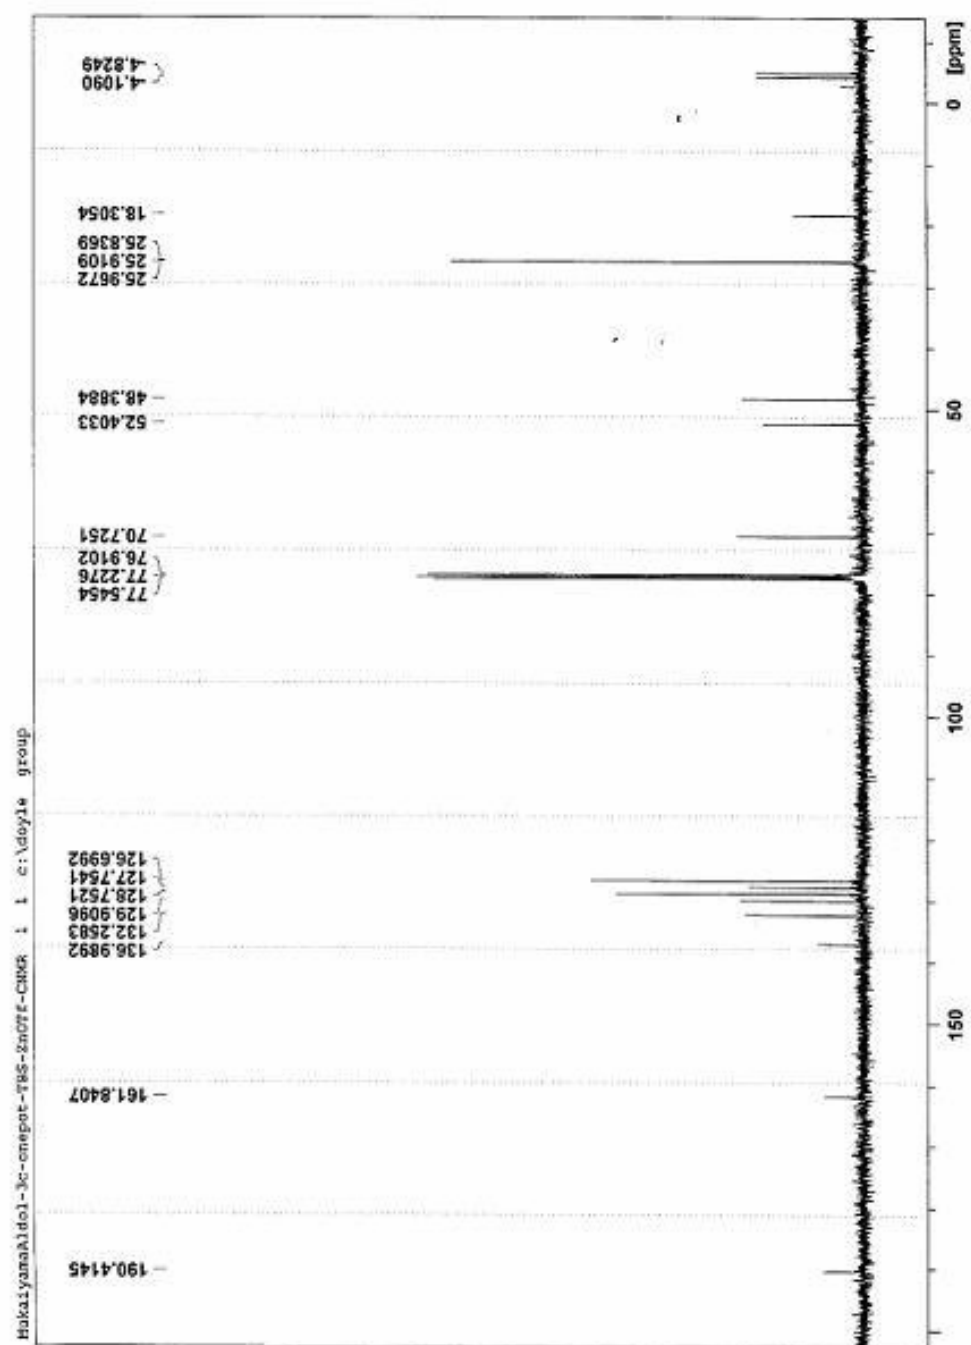



3d

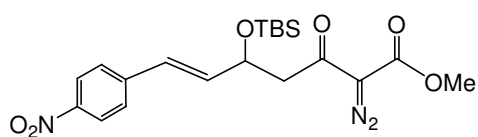

MukaiyamaAldol-3d-onepot-TBS-ZnOTf  
pure 1,2-addition product  
CDC13 021209

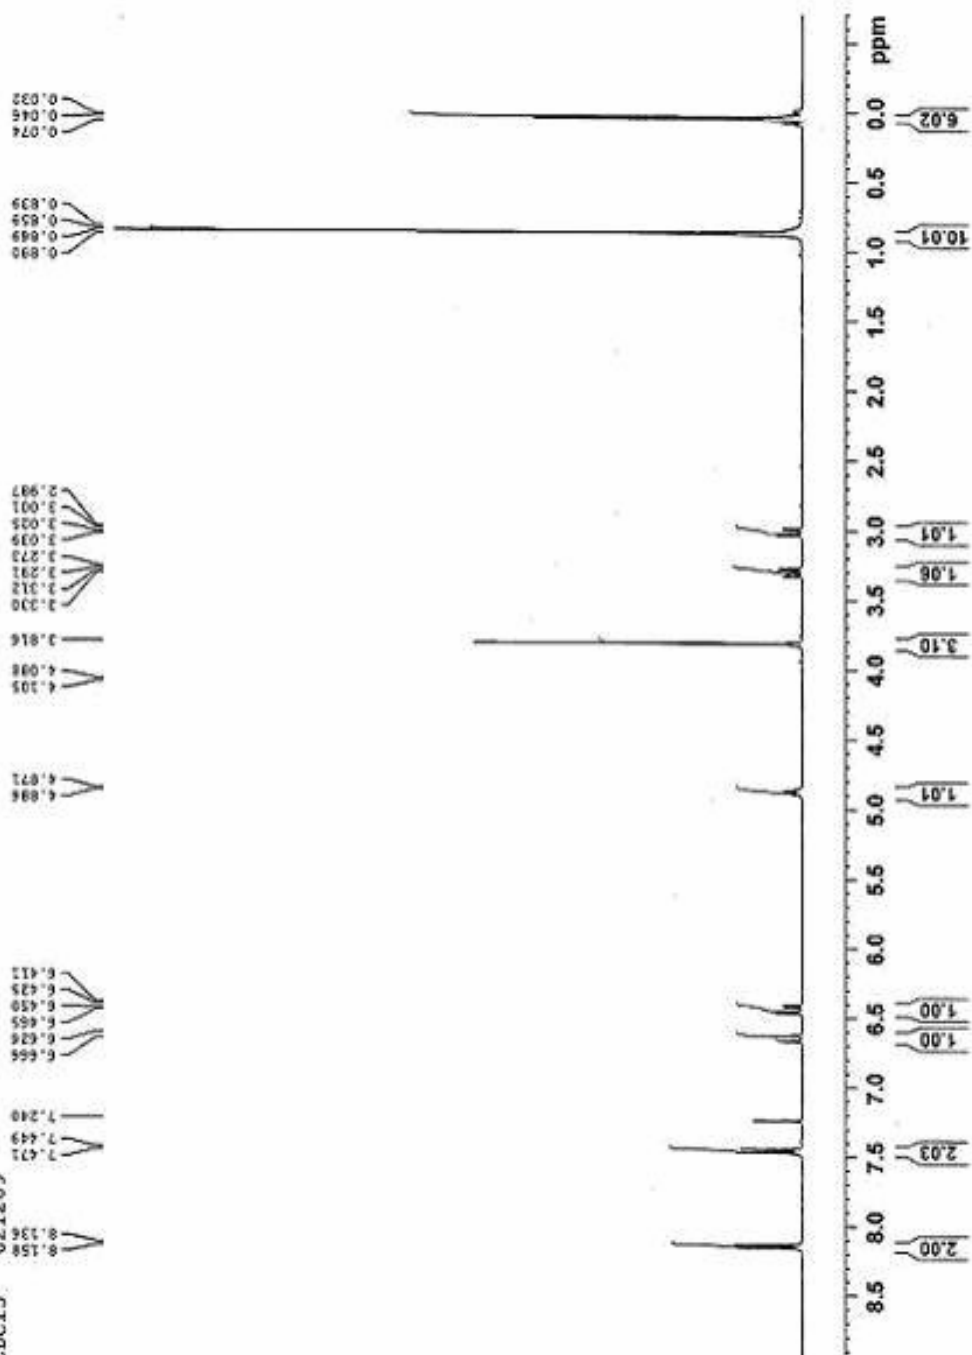







—

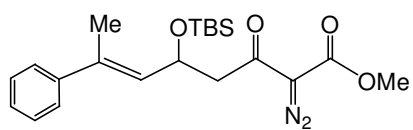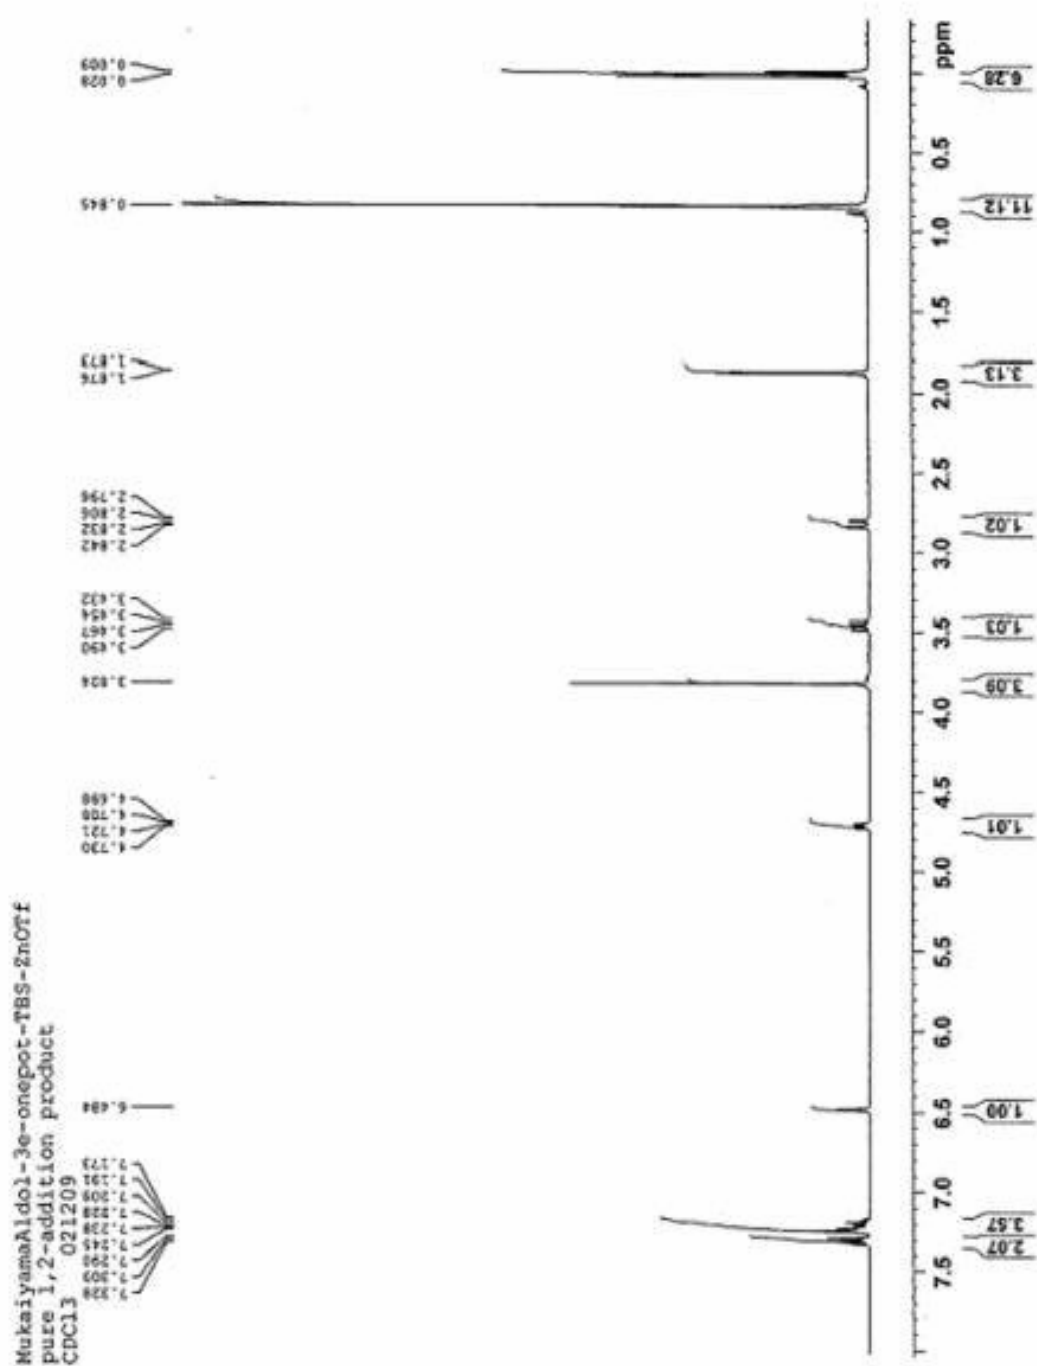



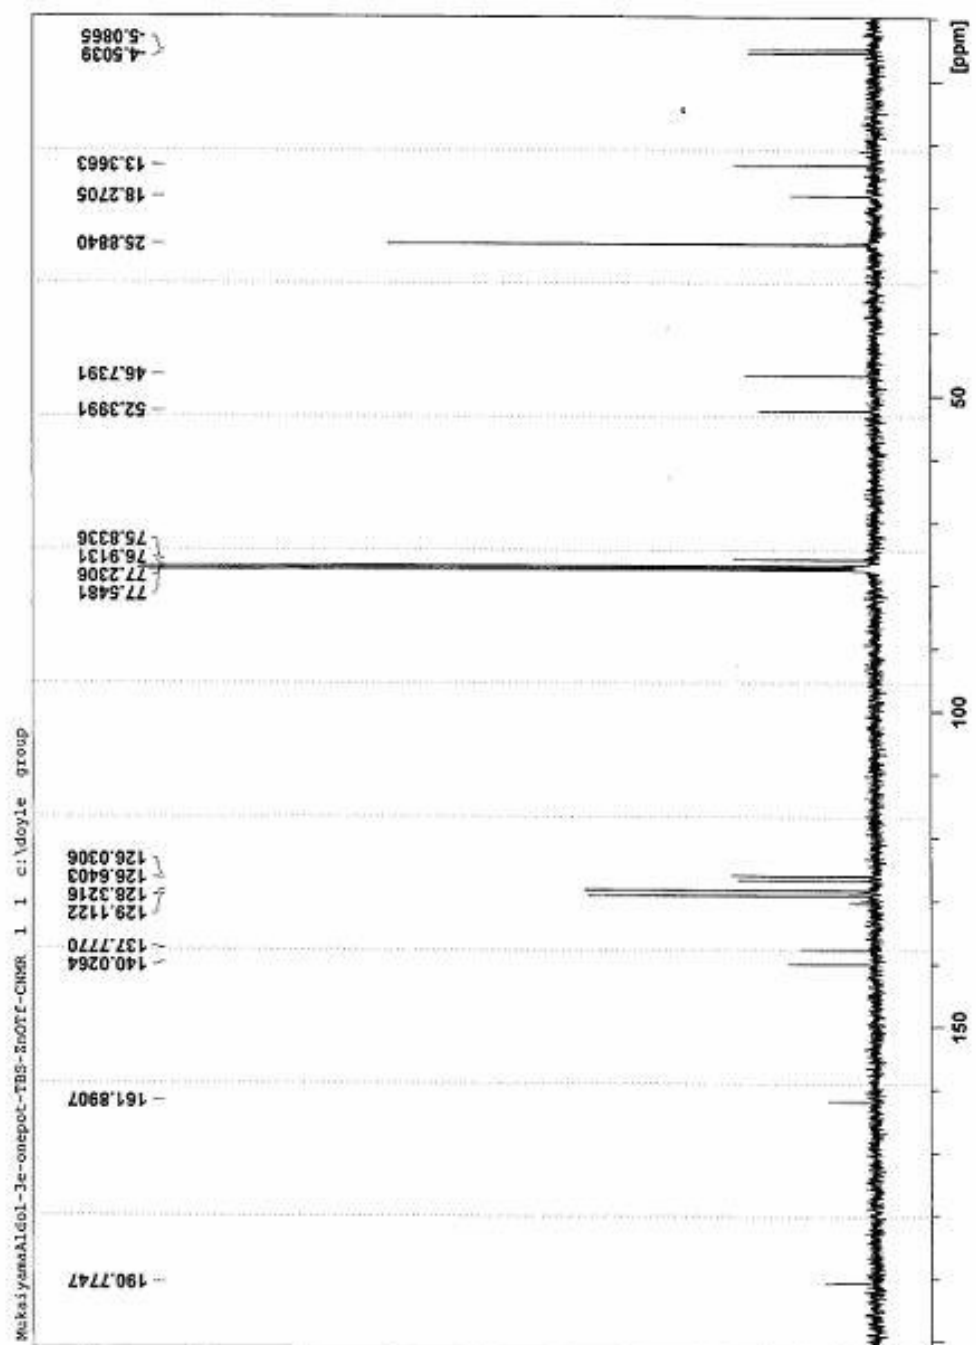



**Abstract**

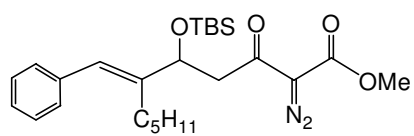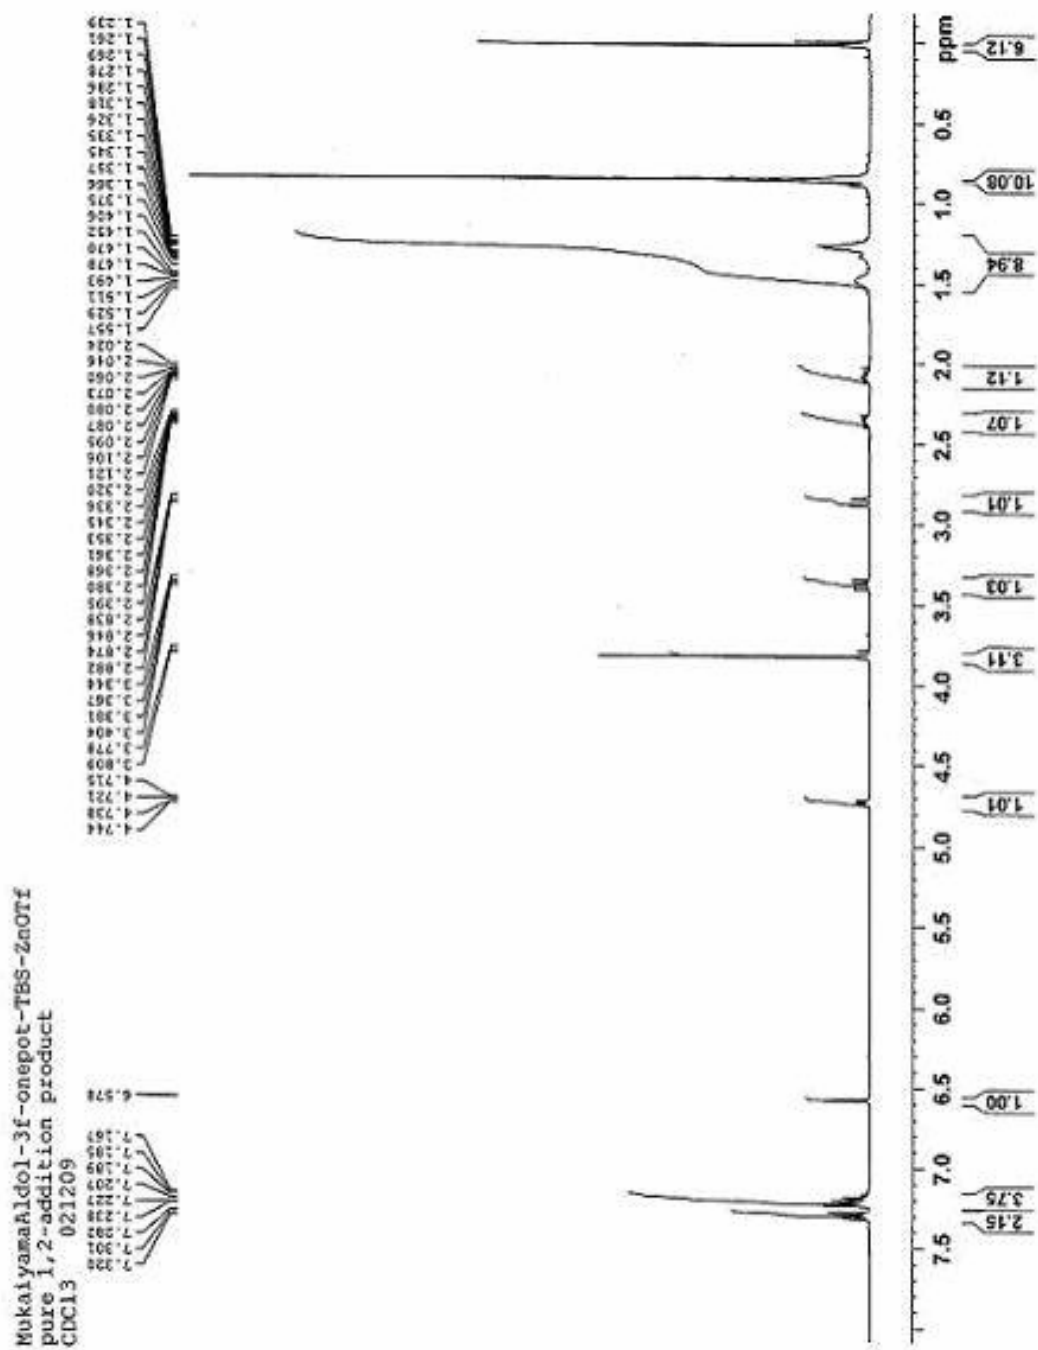



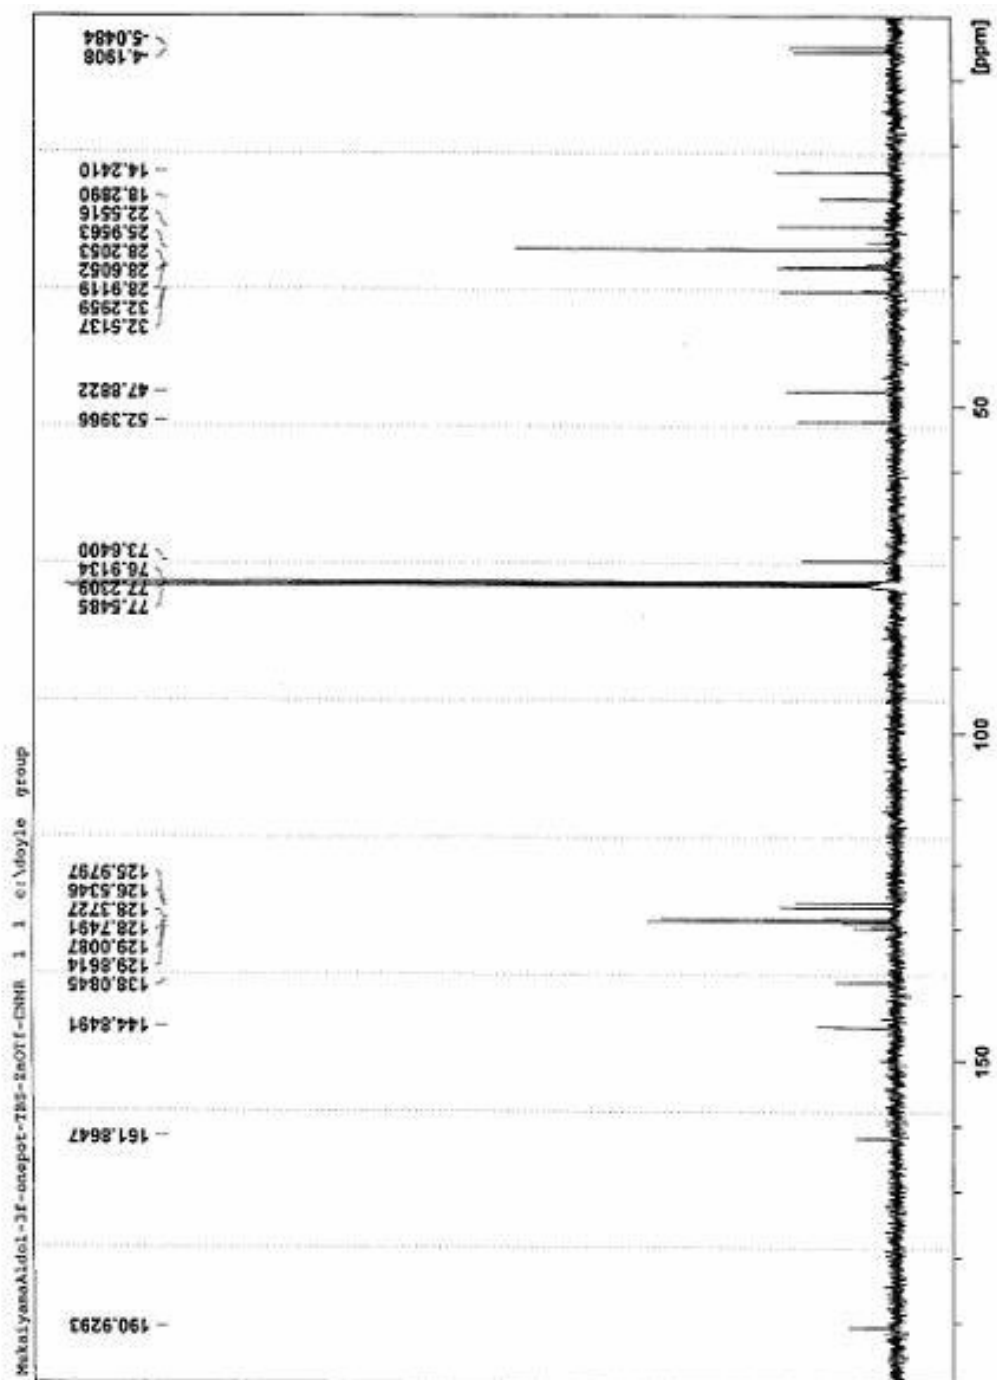



3g

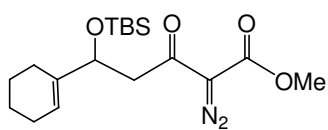

MukaiyamaAldol-3g-onepot-TBS-ZnOTf  
CDC13 021309

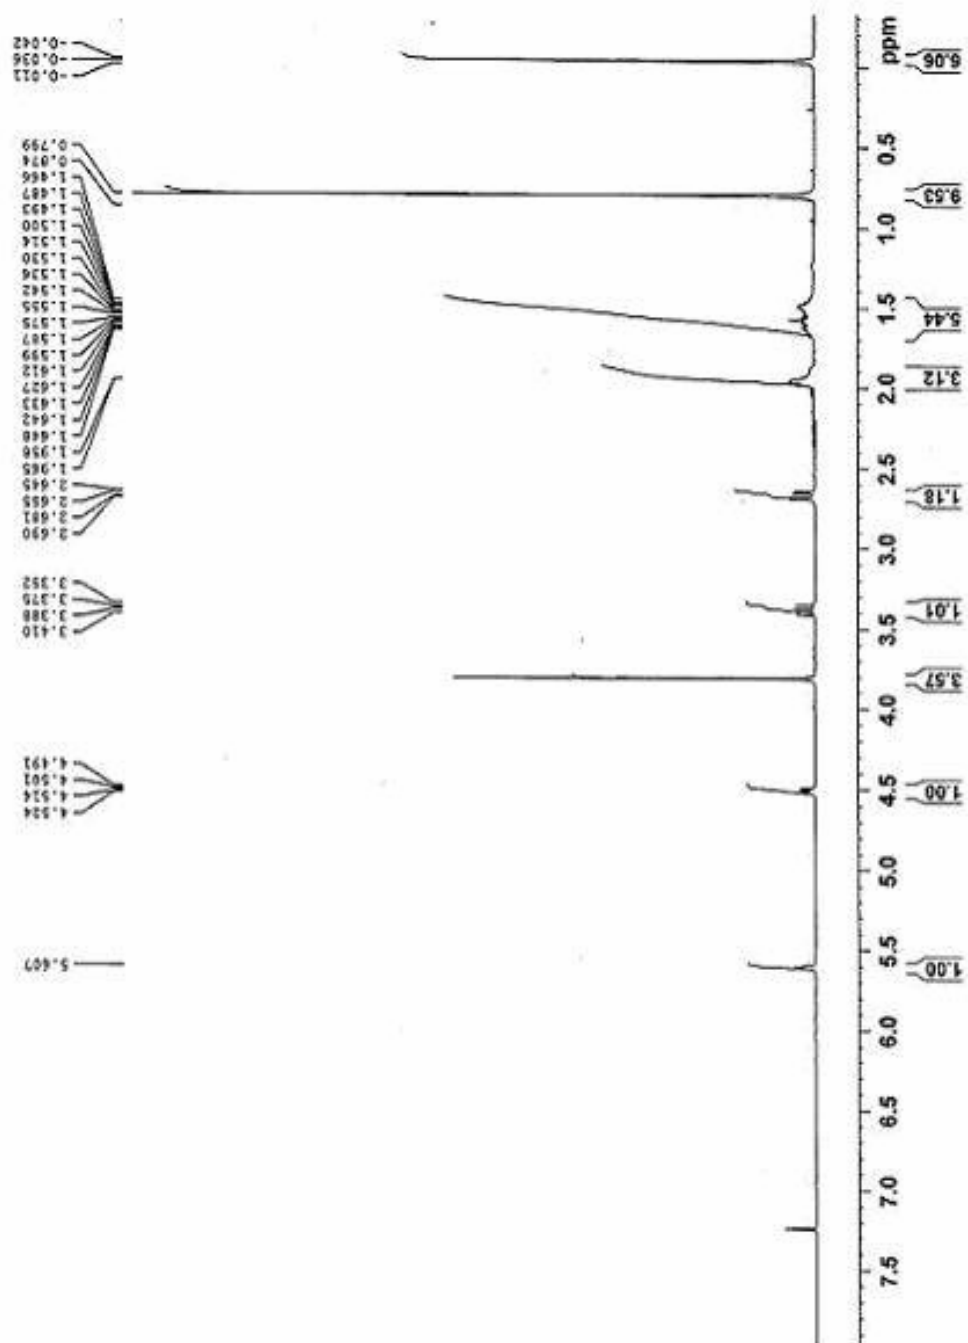



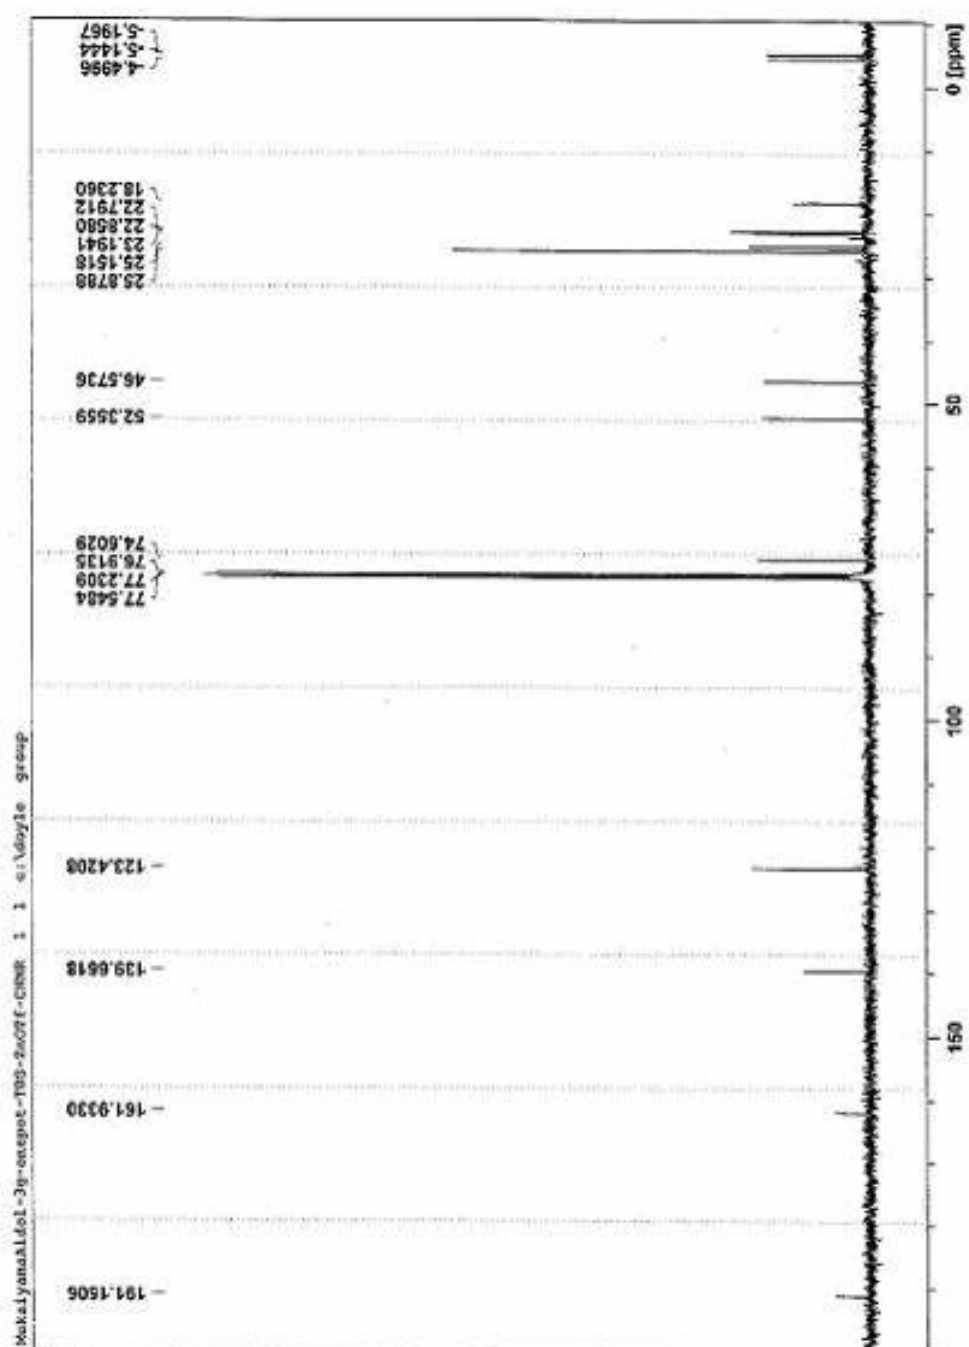



3h

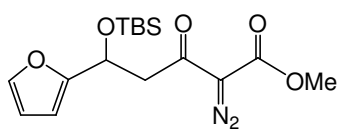

MukaiyamaAldol-3h-onepot-TBS-ZnOTf  
CDCl<sub>3</sub> 021309

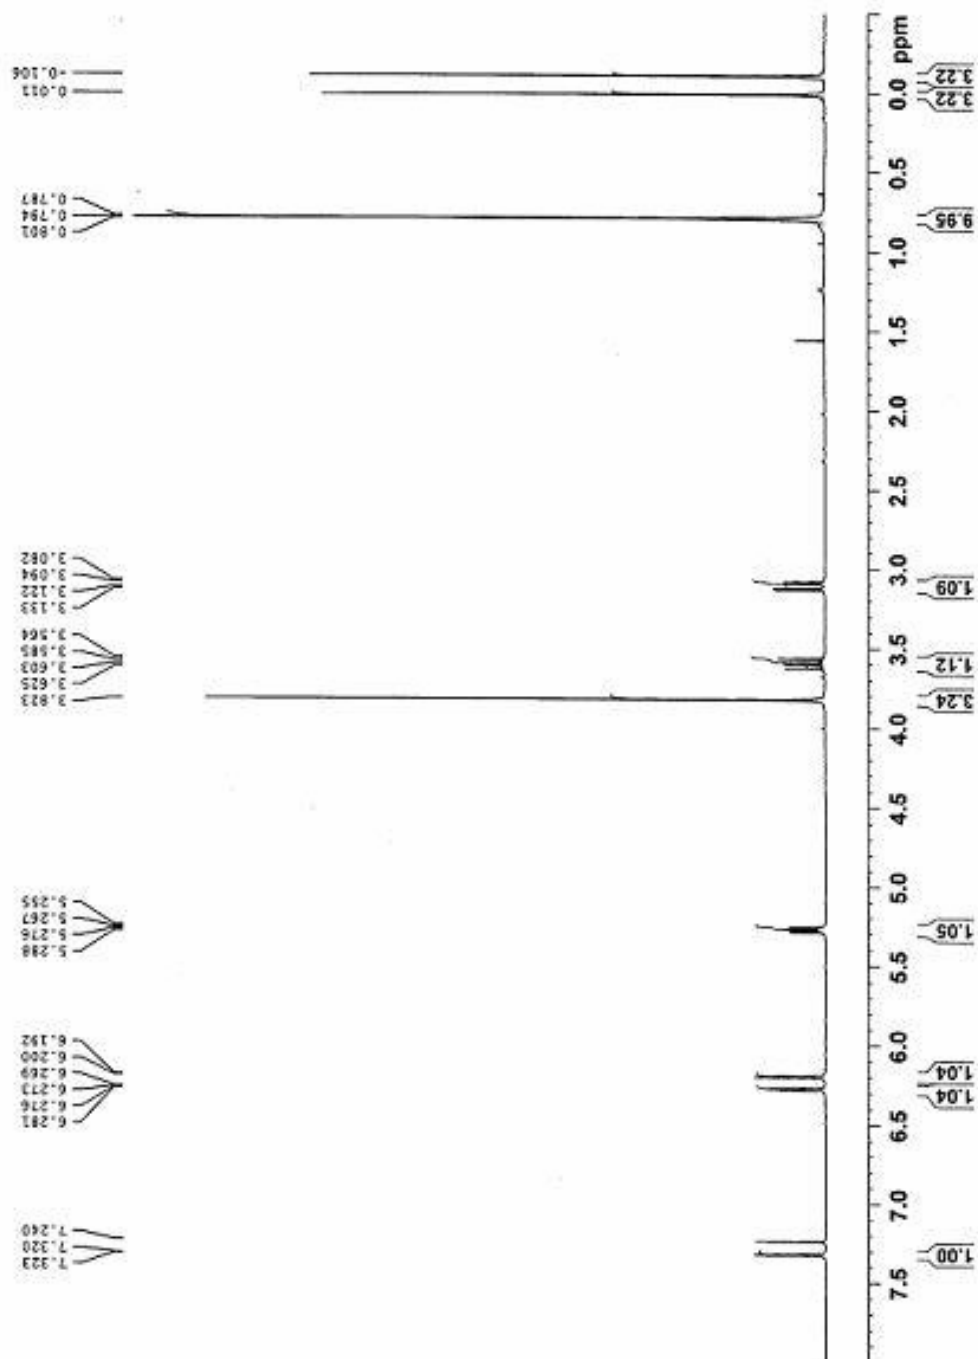



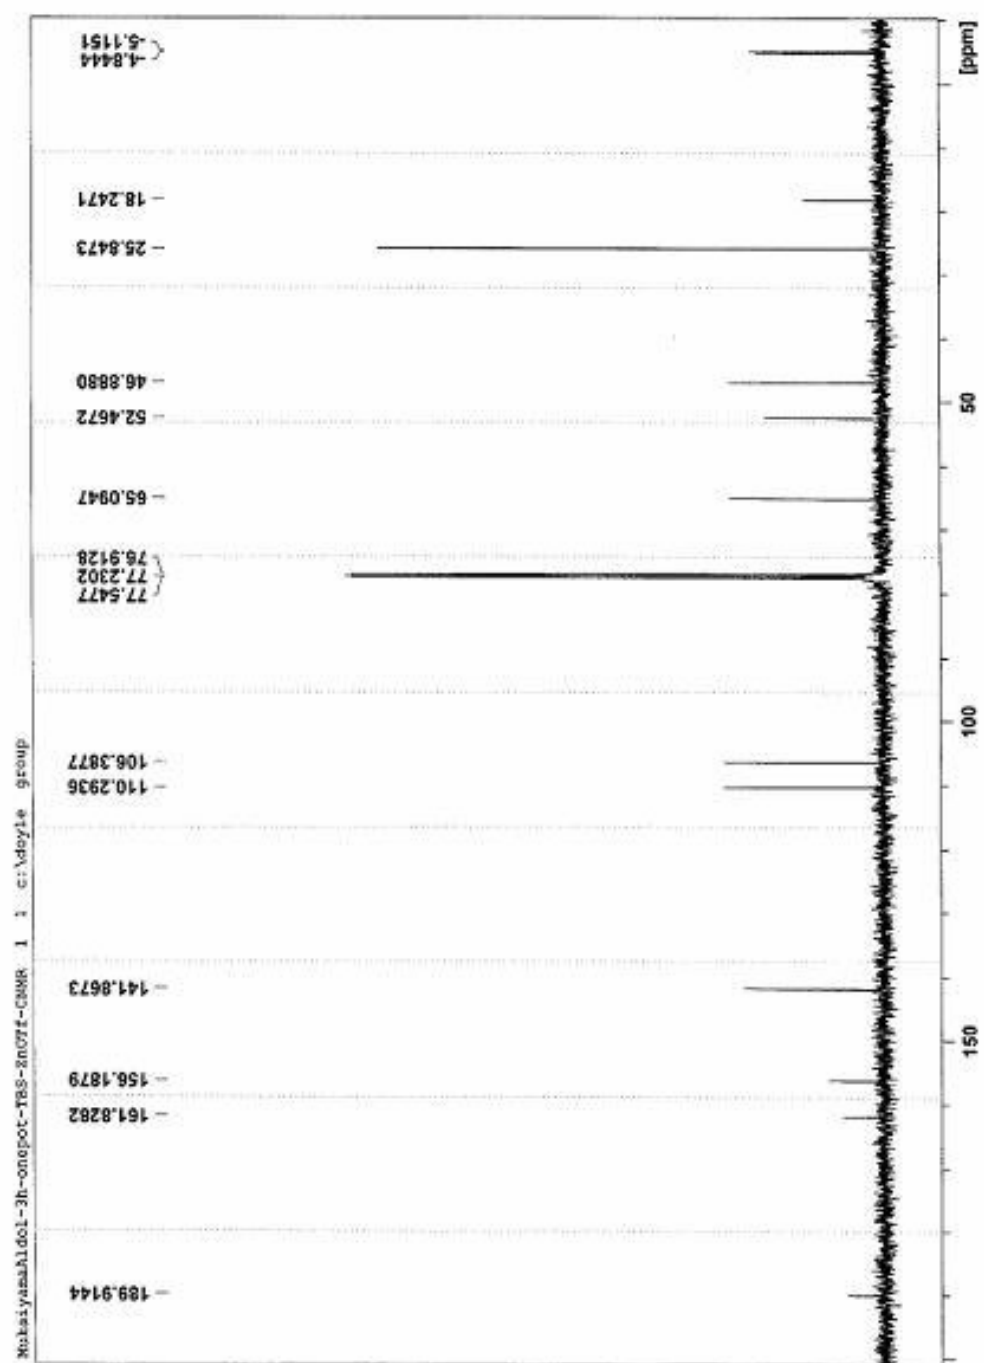







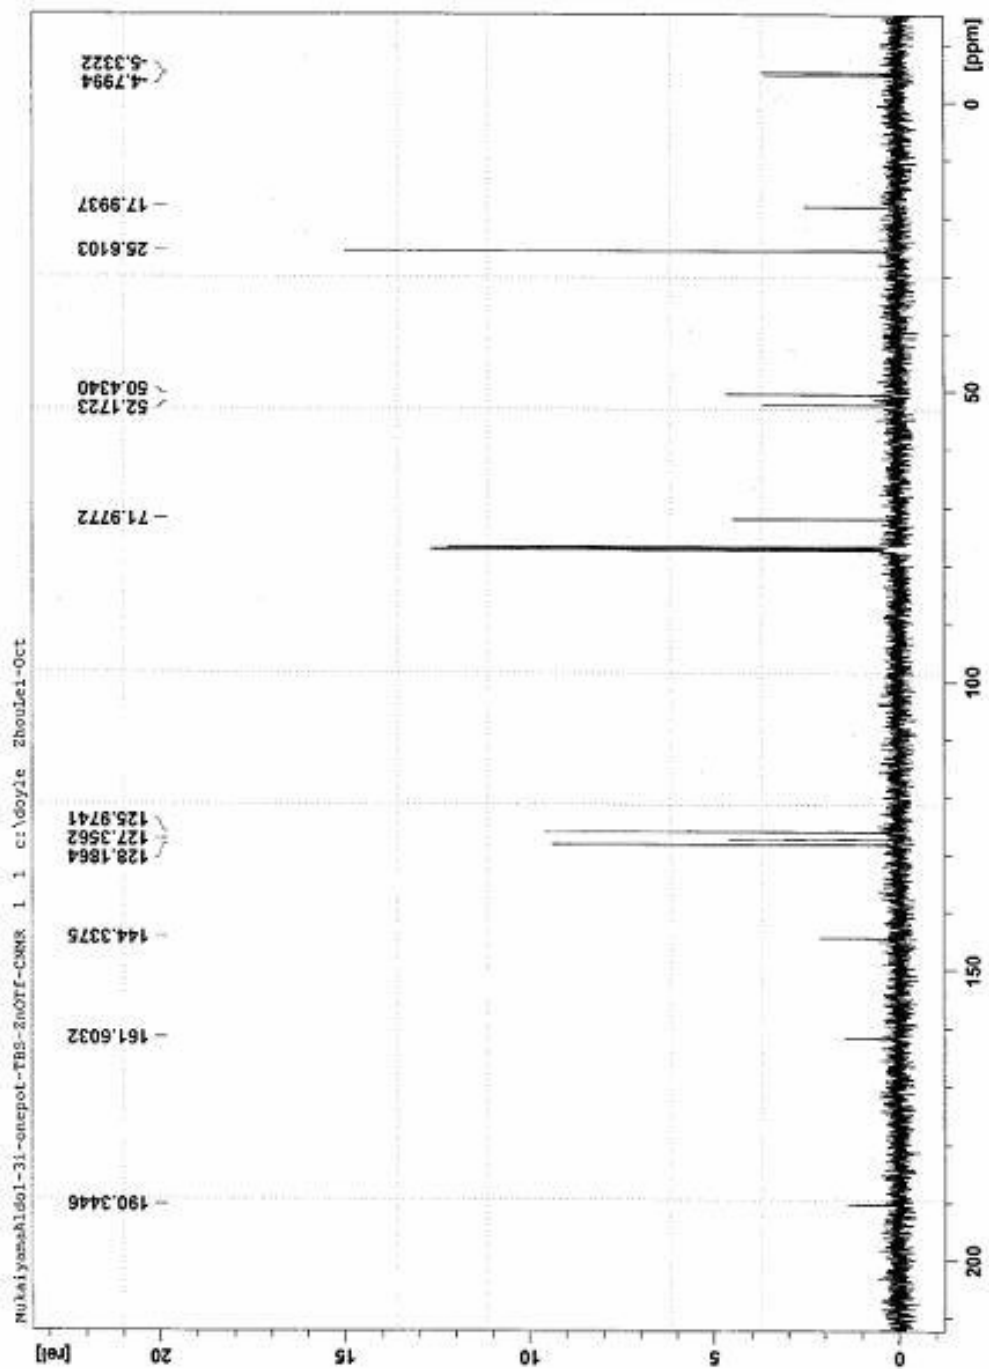



3j

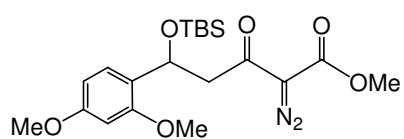

MukaiyamaAldol-3j-onepot-TBS-ZnOTf  
CDCl<sub>3</sub> 091509

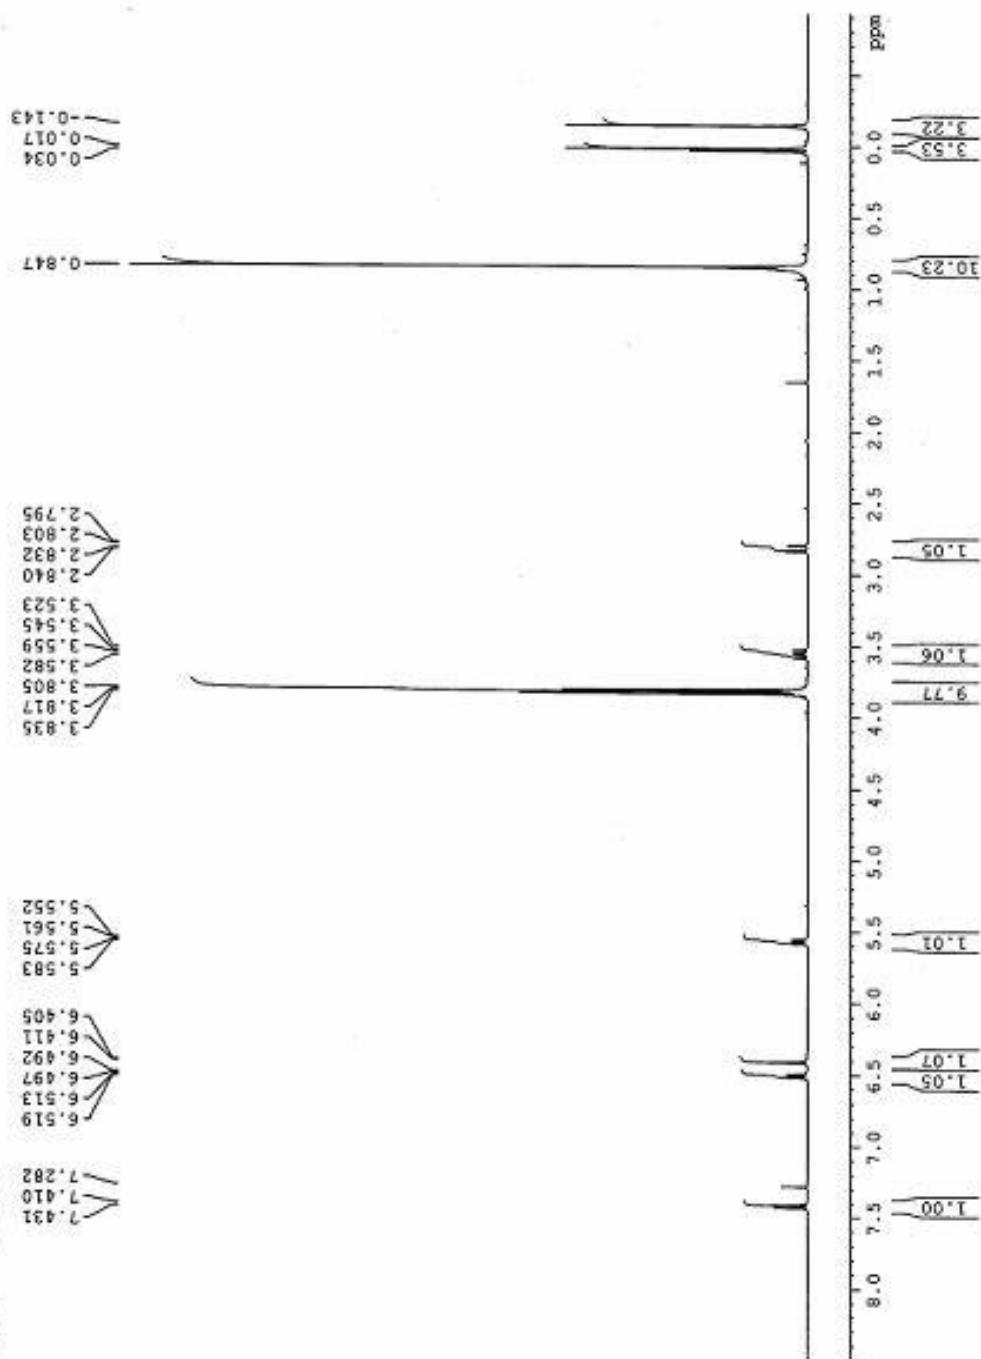



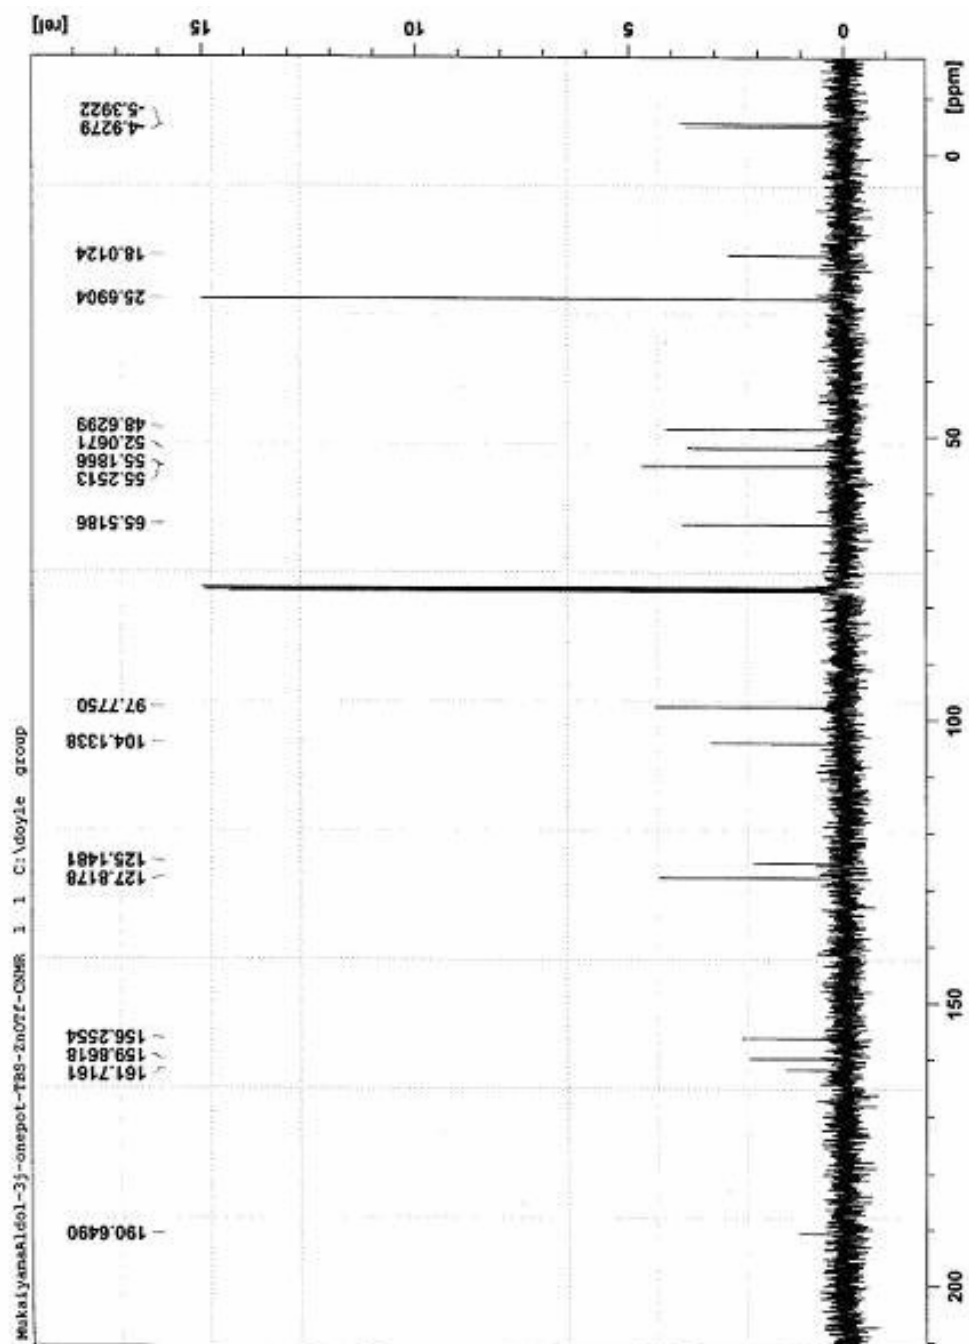



3k

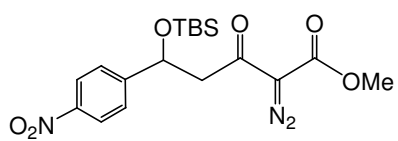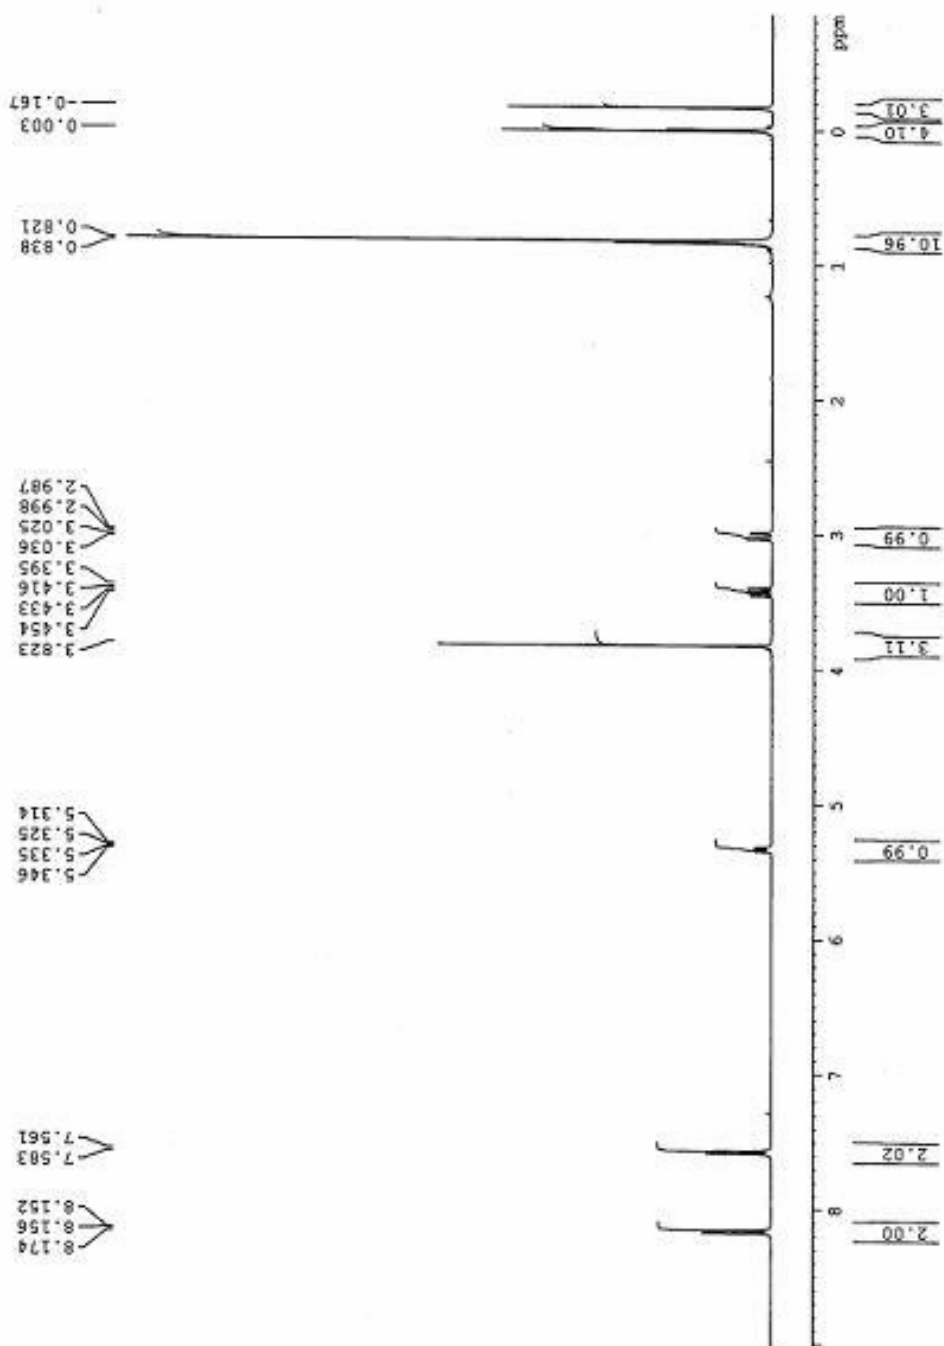

MukaiyamaAldol-3k-onepot-TBS-2nOTf  
CDC13 091509



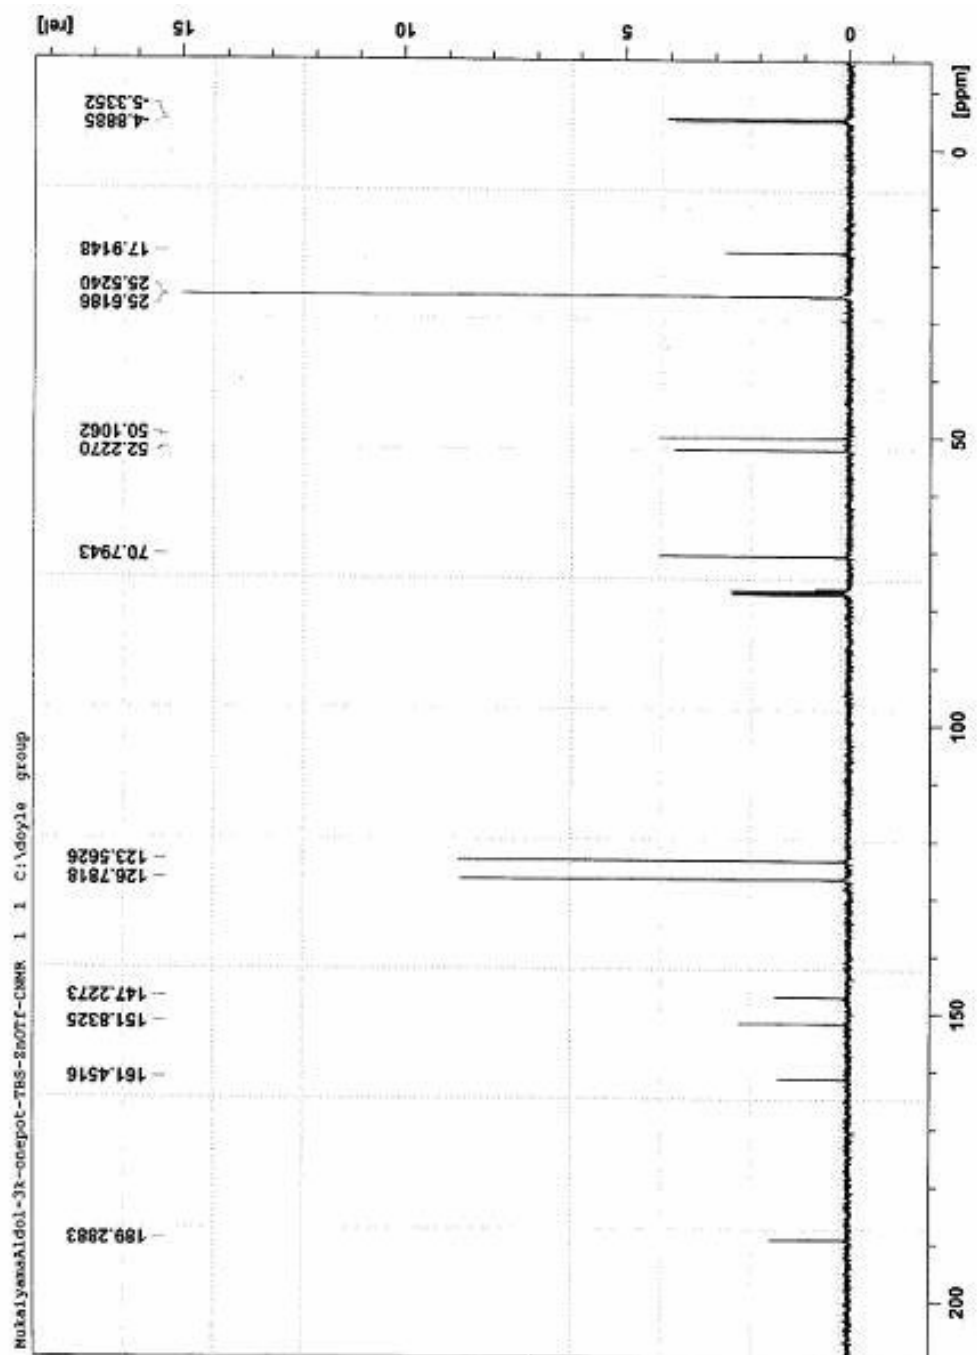



31

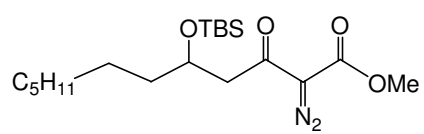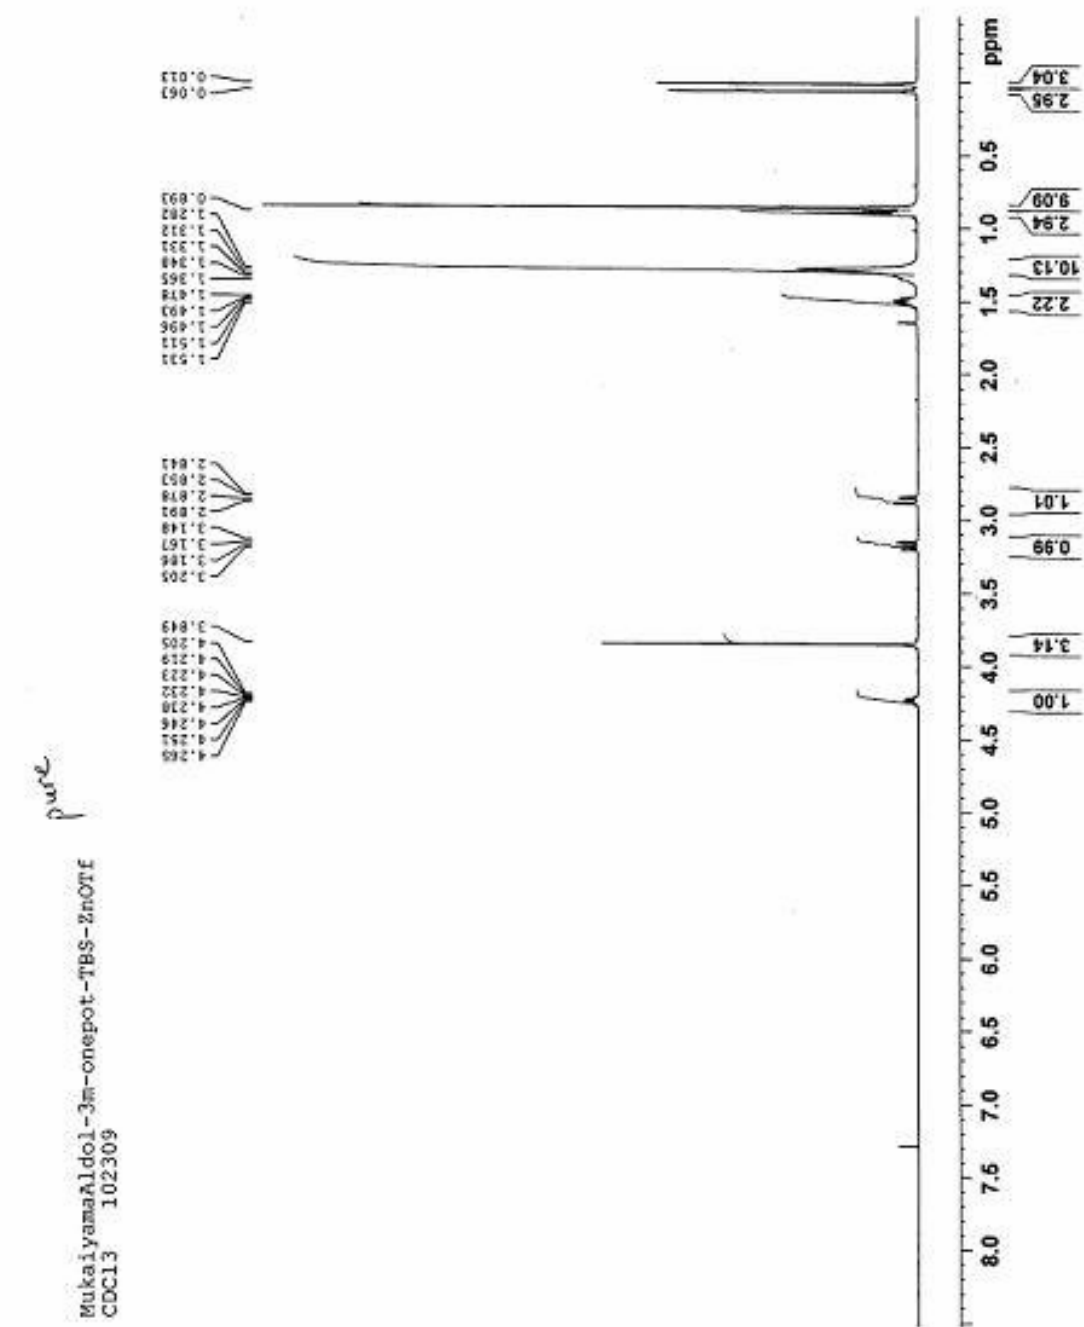



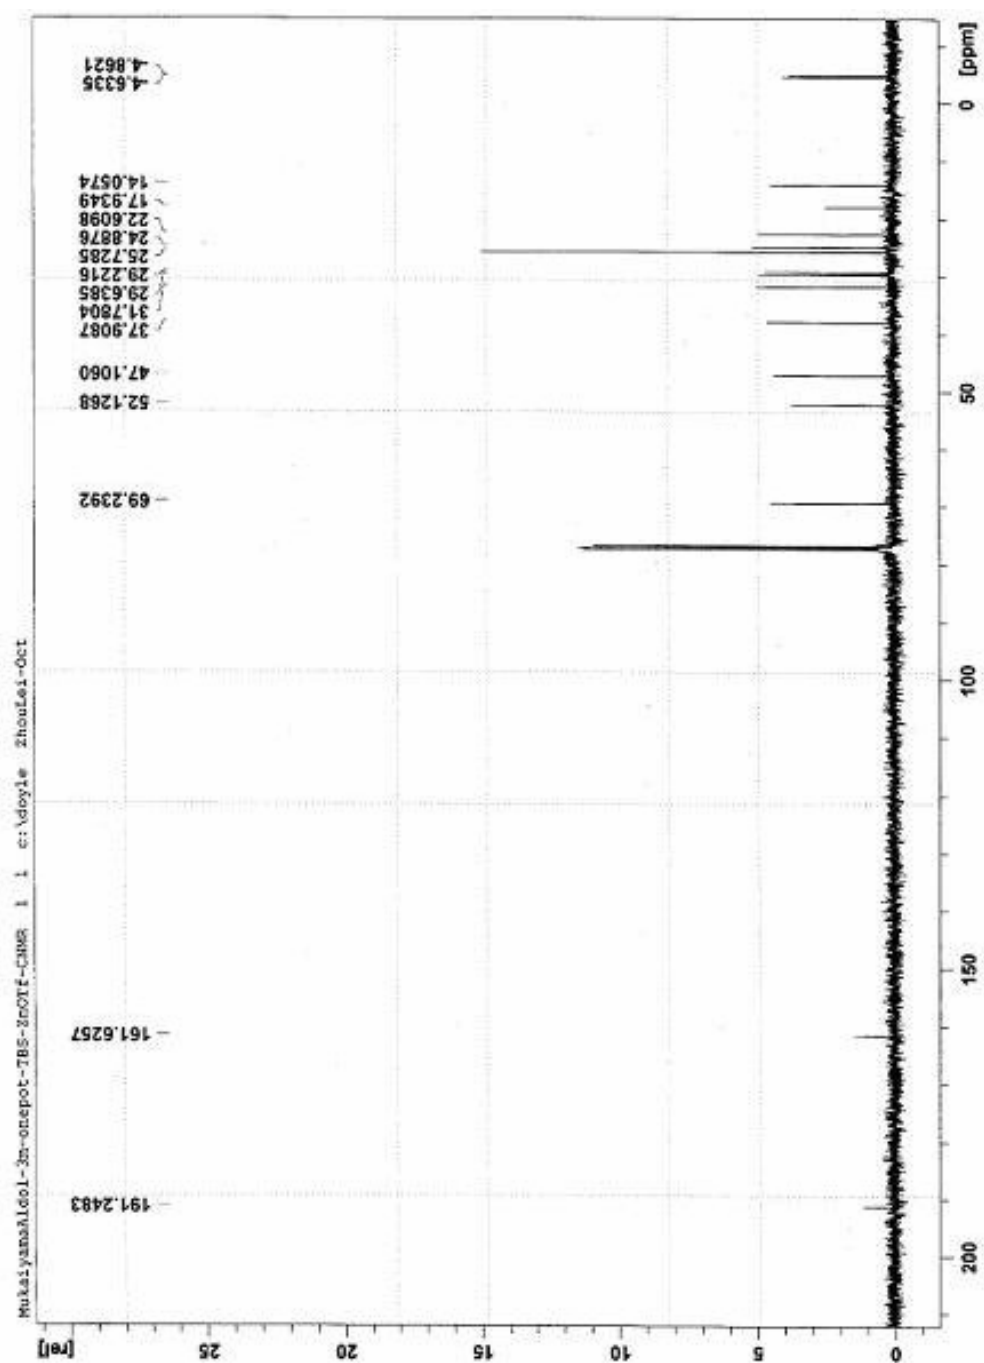



3m

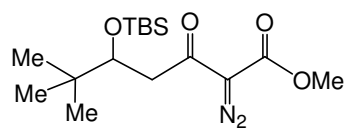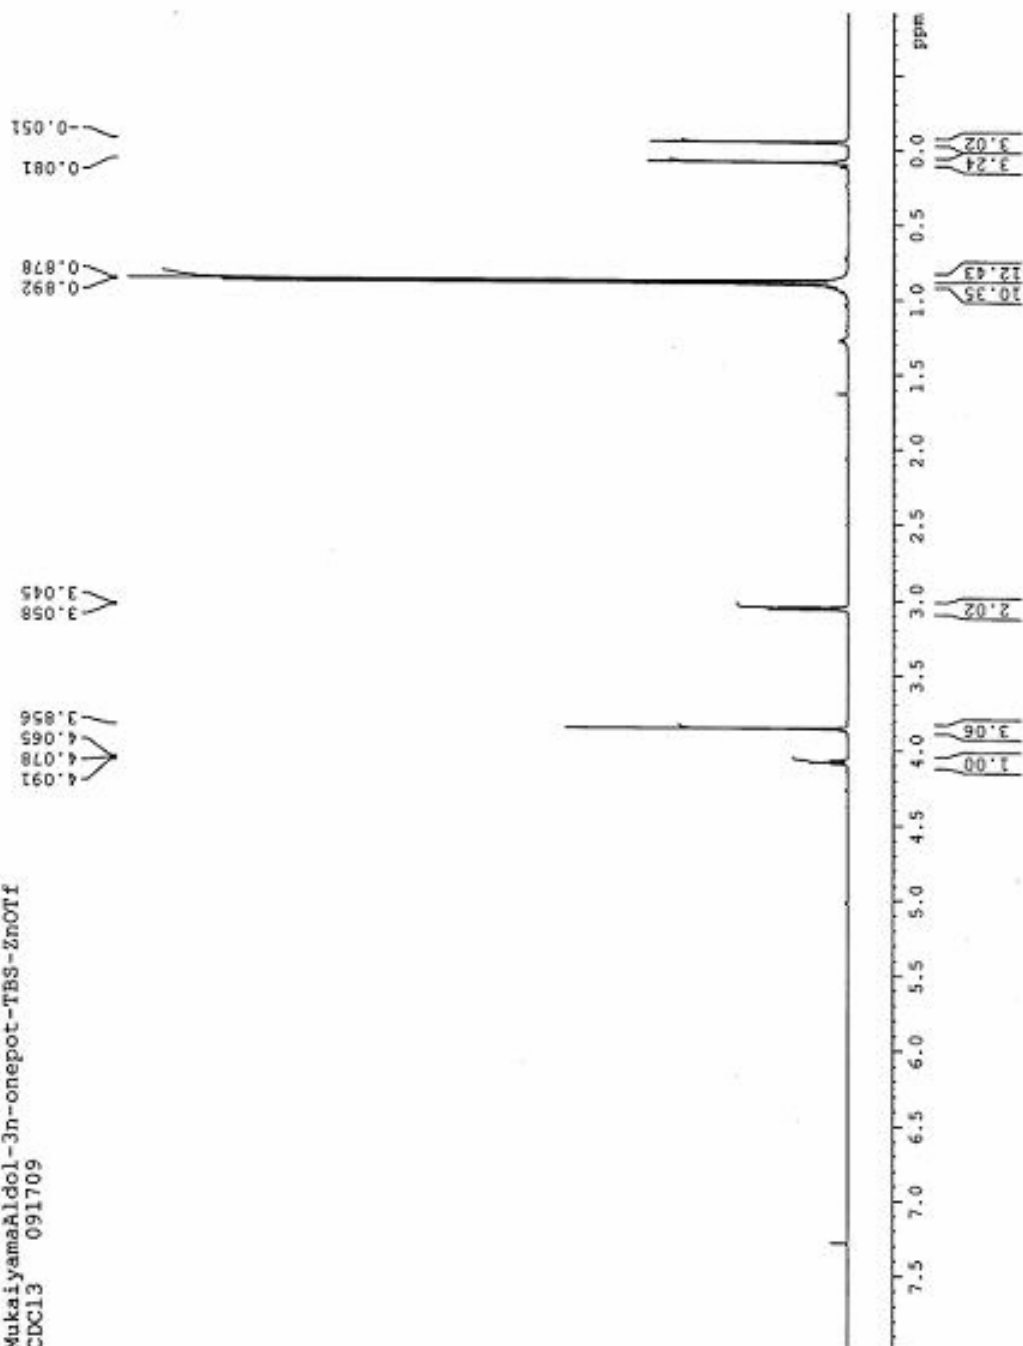

MukaiyamaAldol-3n-onepot-TBS-ZnOTf  
CDCl<sub>3</sub> 091709



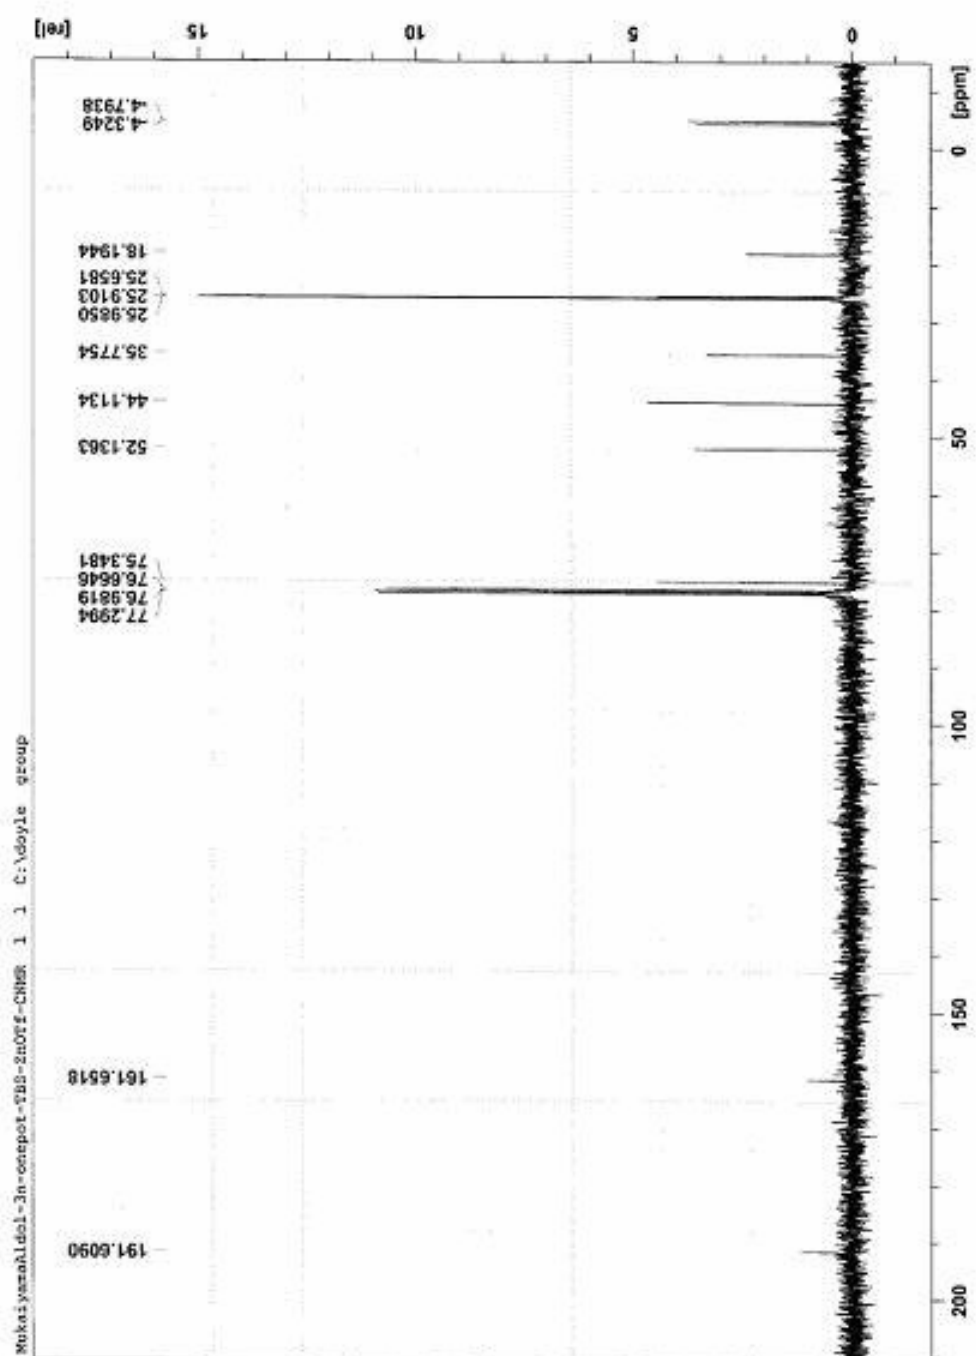



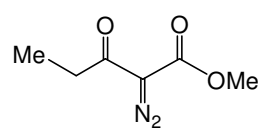

Methyl 2-diazo-3-oxo-pentanoate  
CDCl<sub>3</sub> 021709

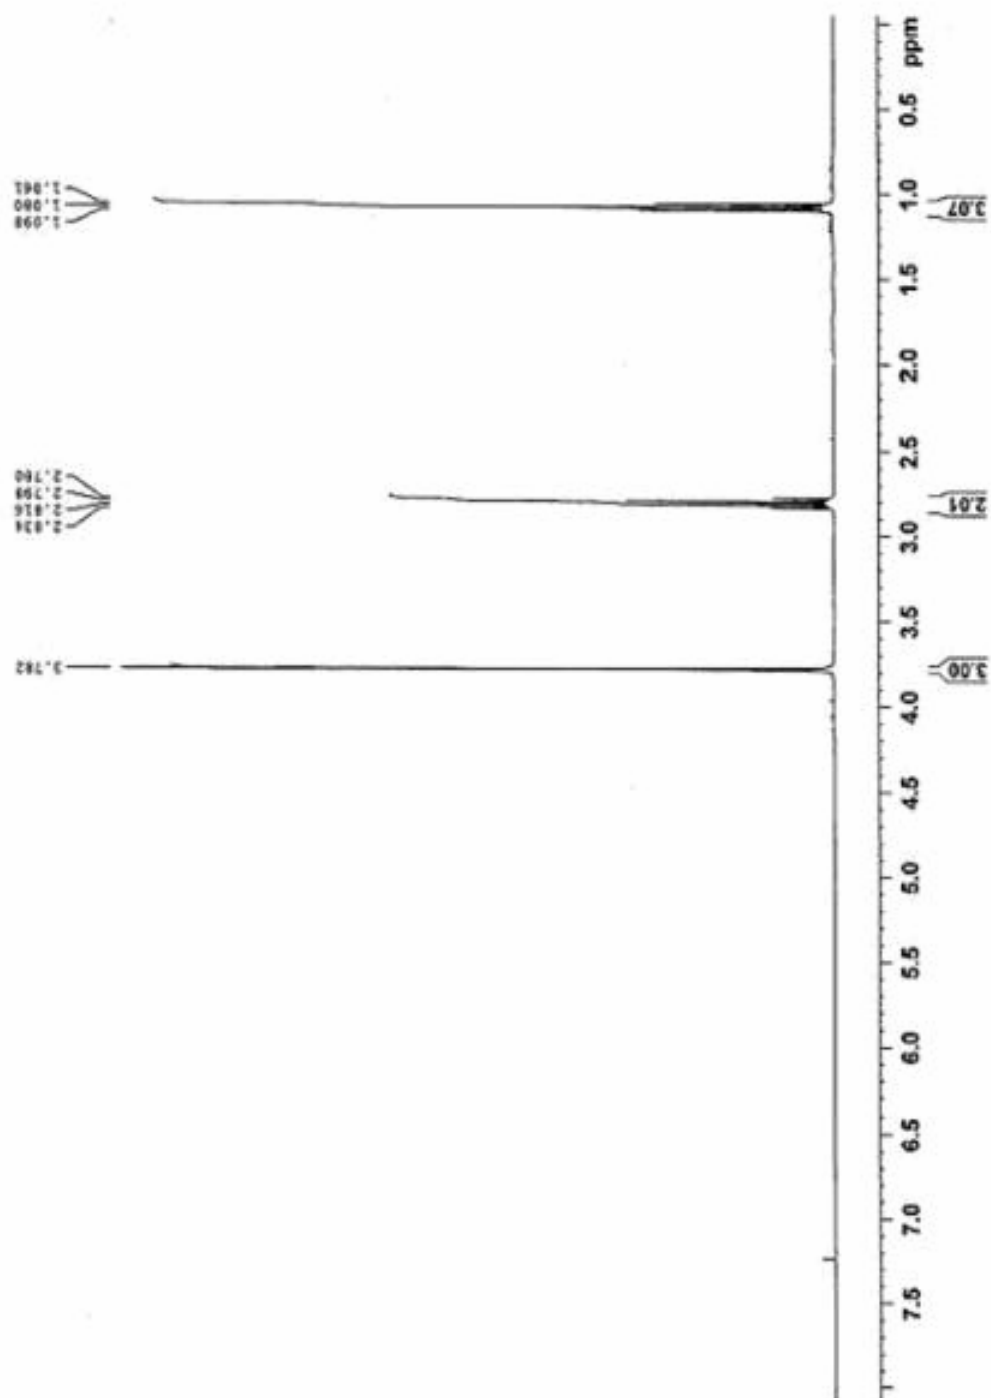



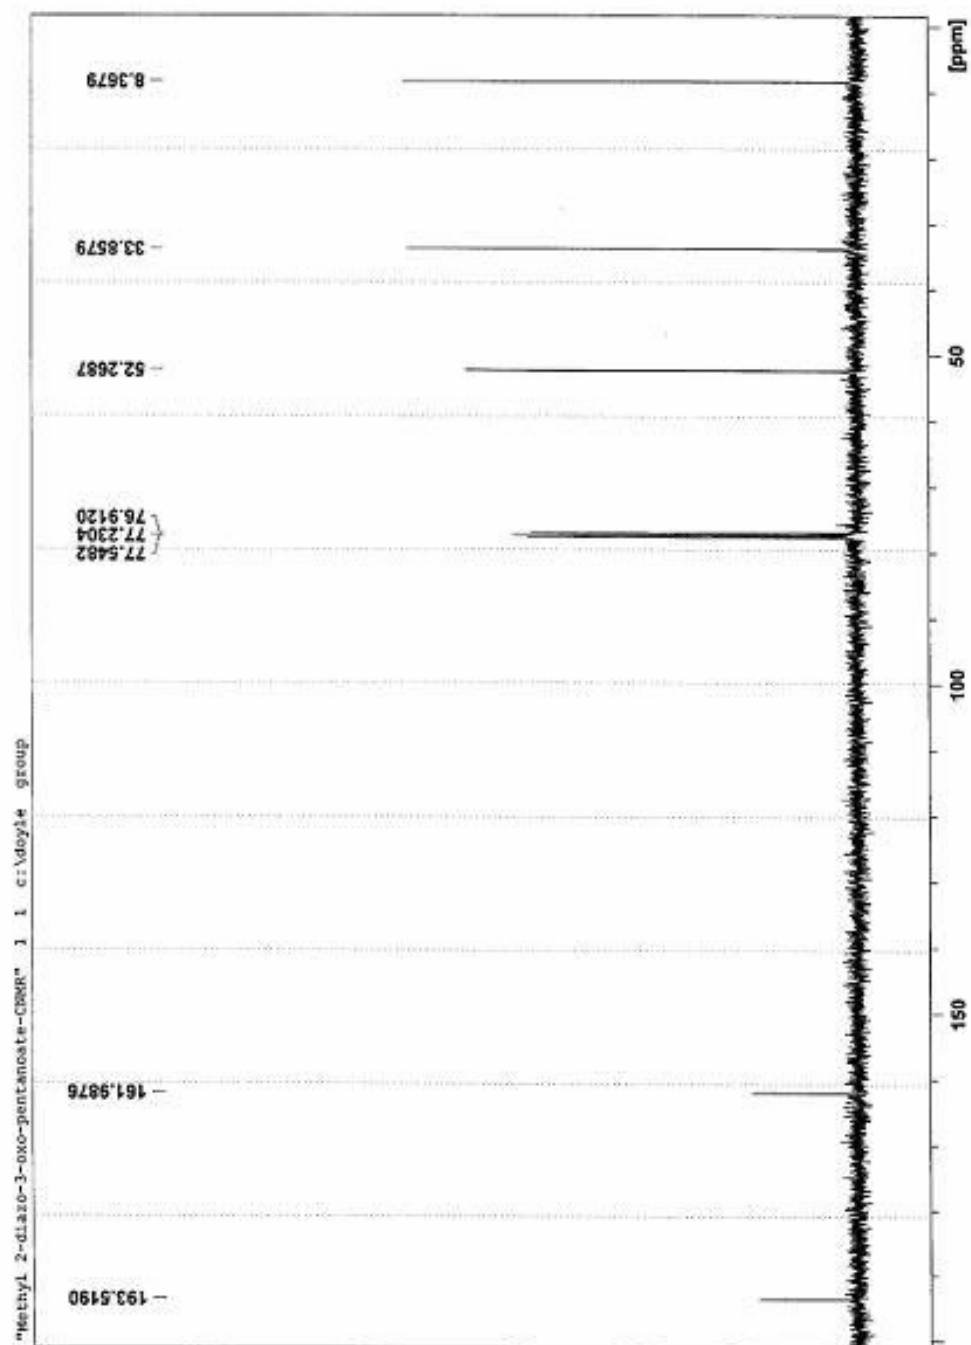



# 5c NMR after column chromatography

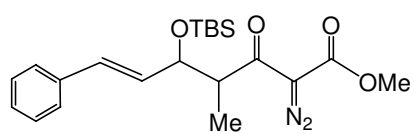

MukaiyamaAldol-6c-onepot-TBS-2nOTf  
mainly one isomer  
CDCl3 022309

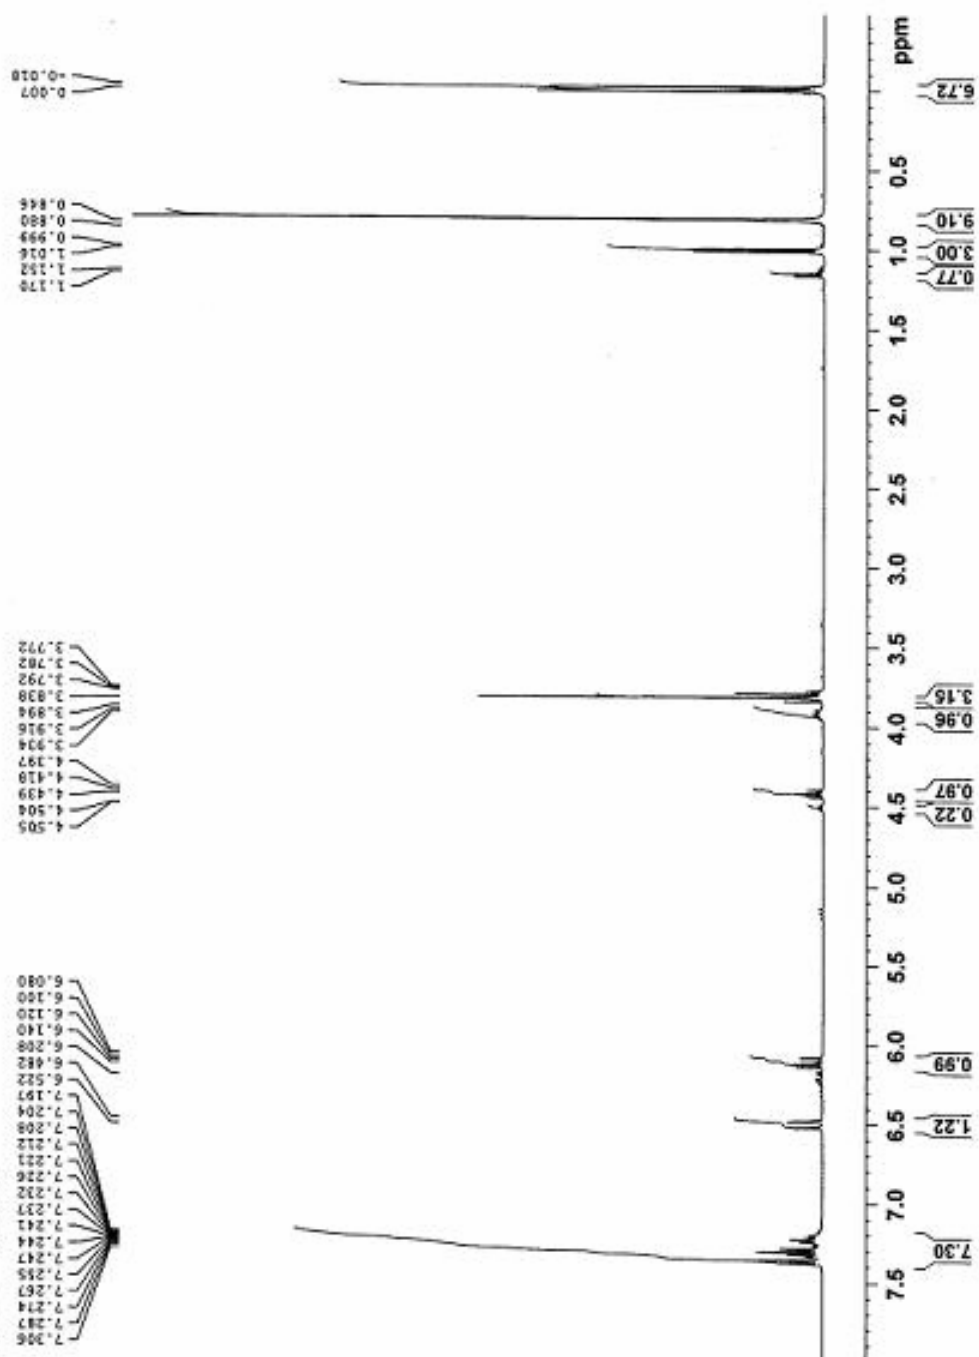



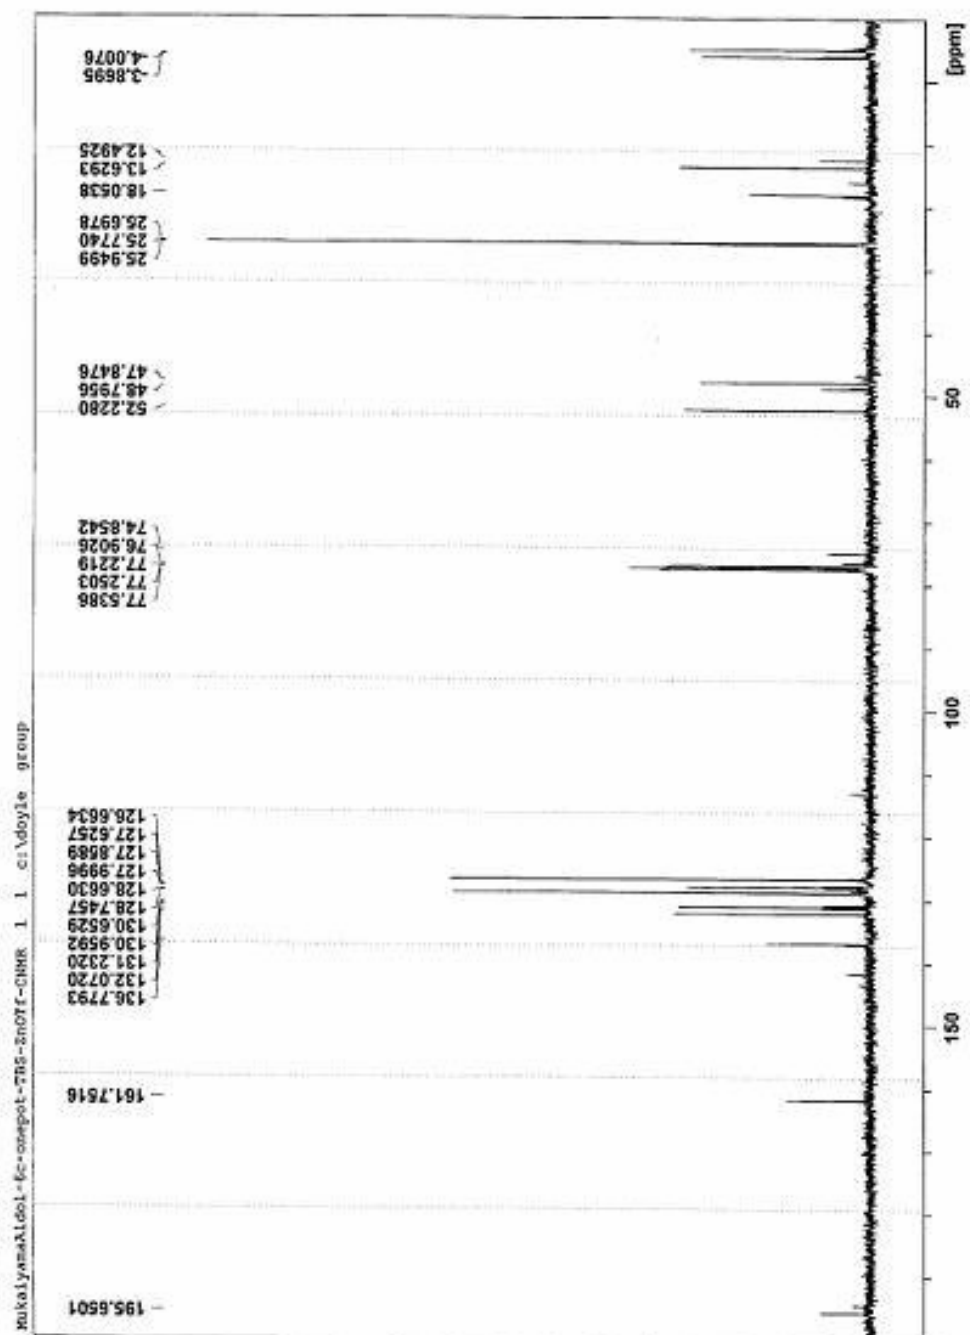



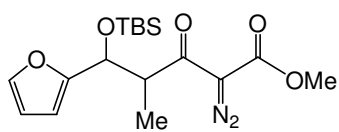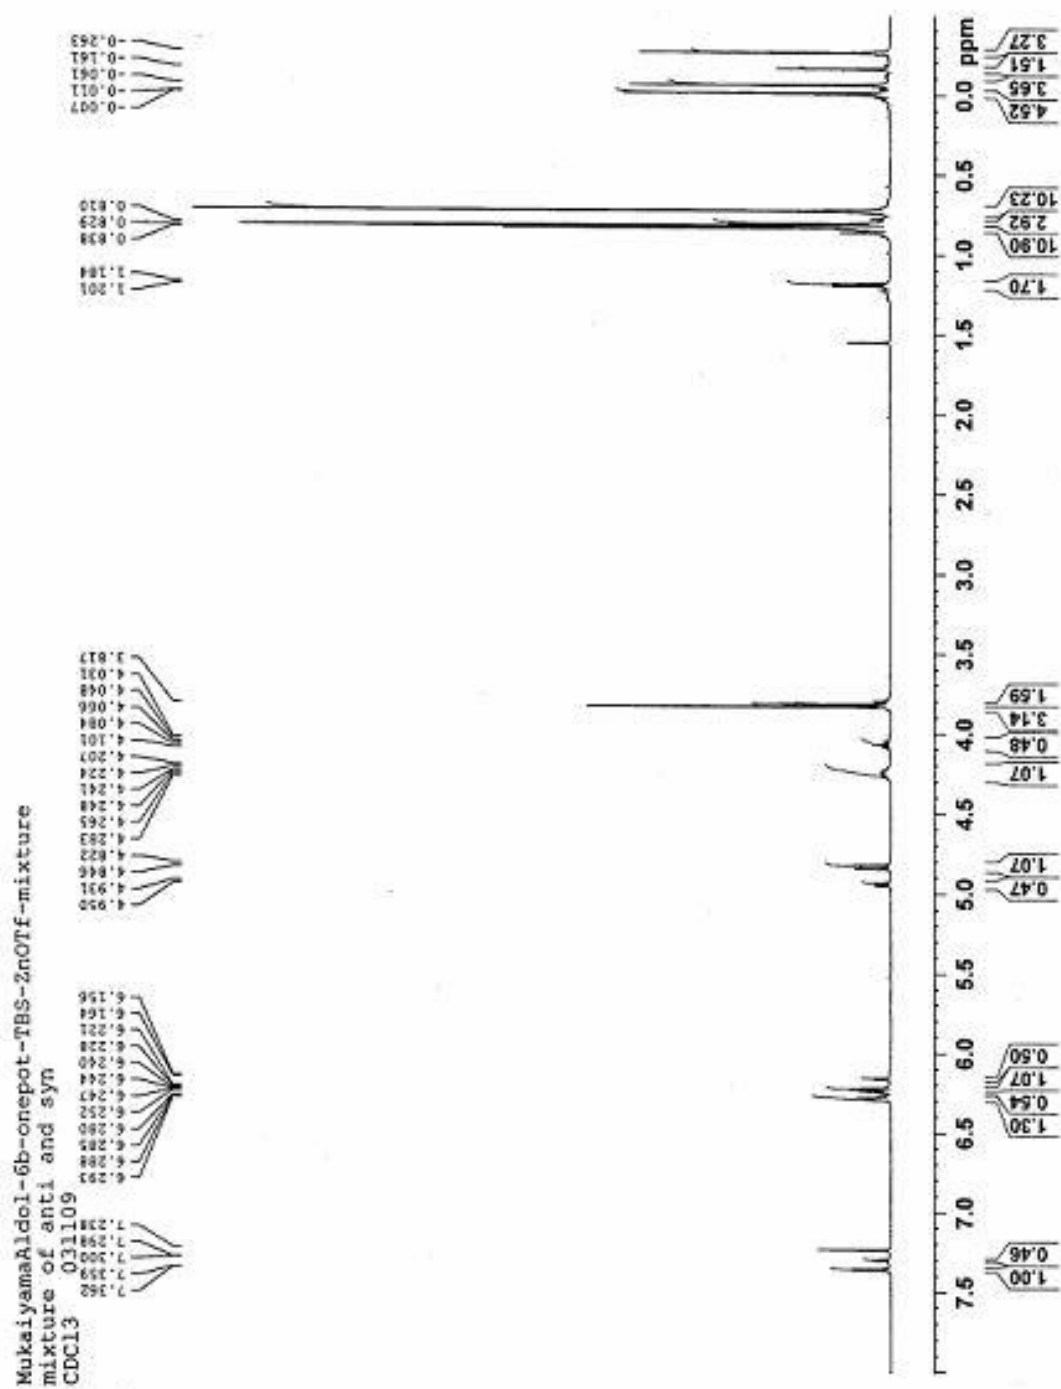



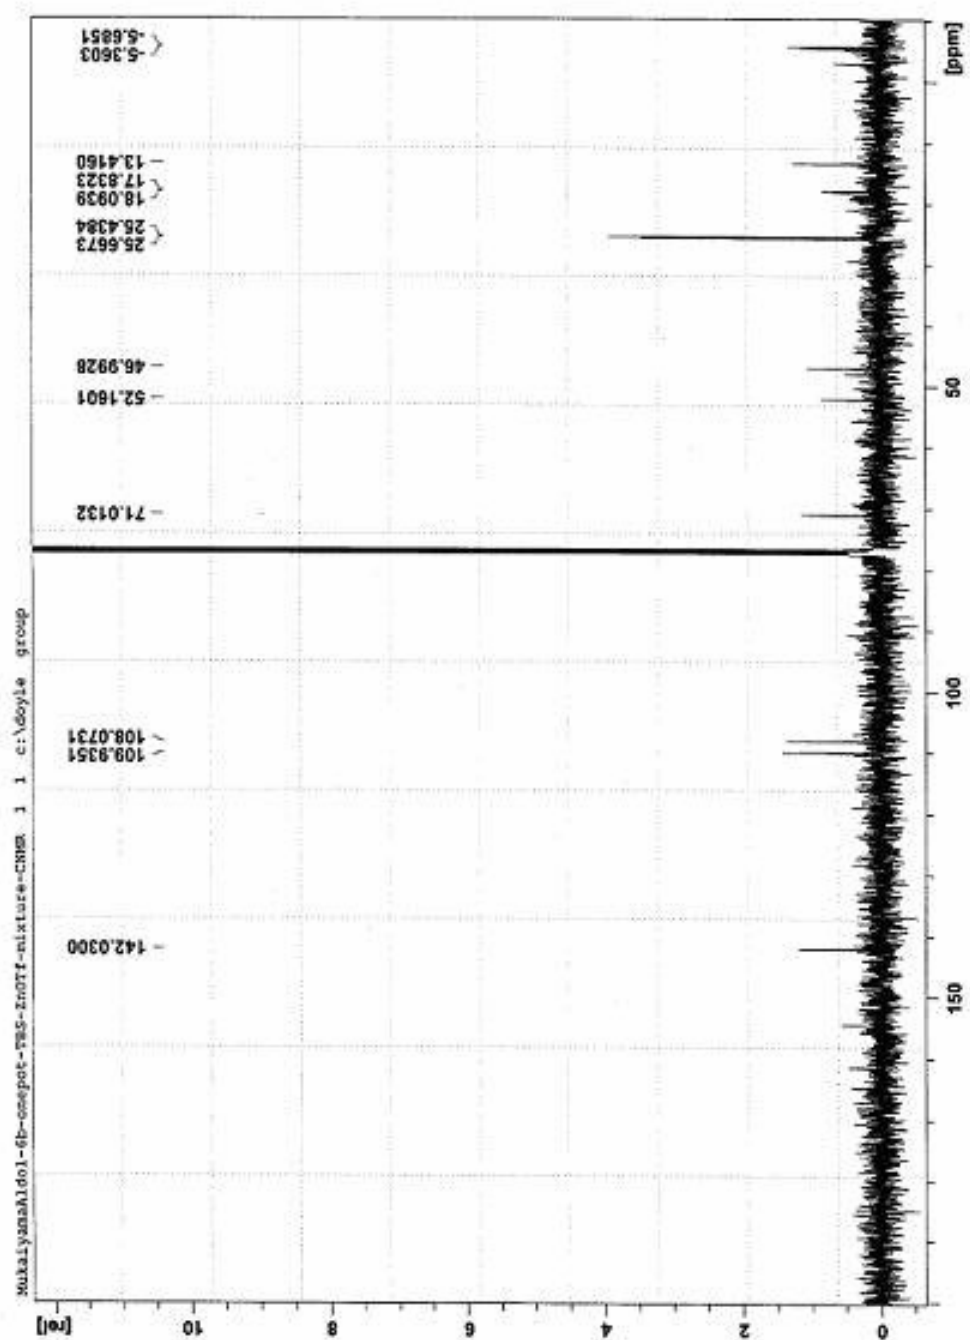



# 5i NMR after column chromatography

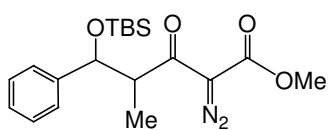

MukaiyamaAldol-6a-onepot-TBS-ZnOTf  
mainly anti product  
CDCl3 022009

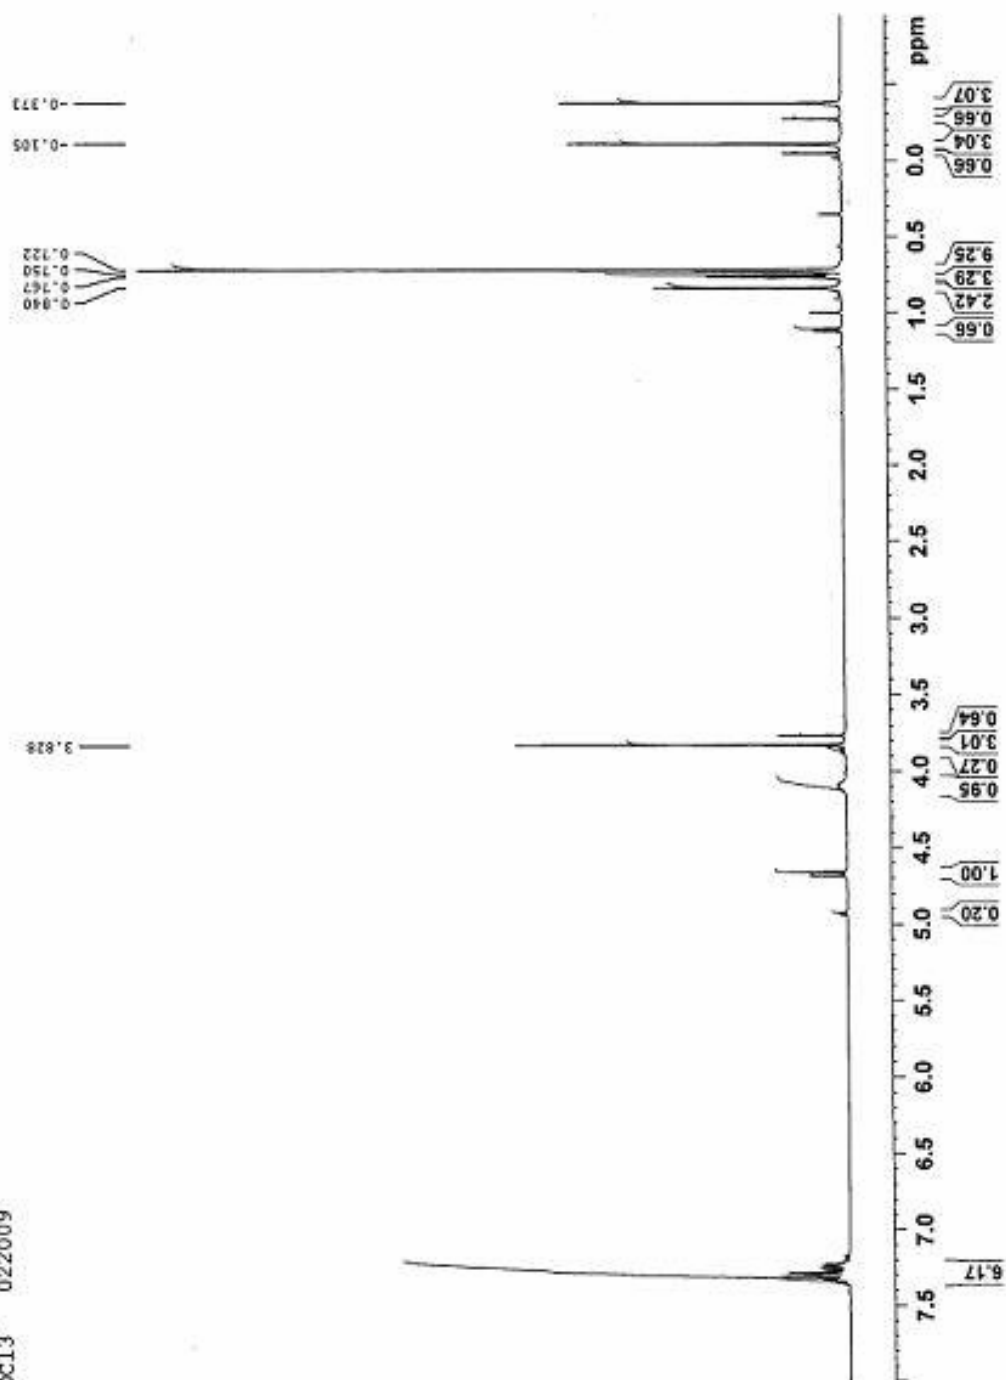



Major product  
100%

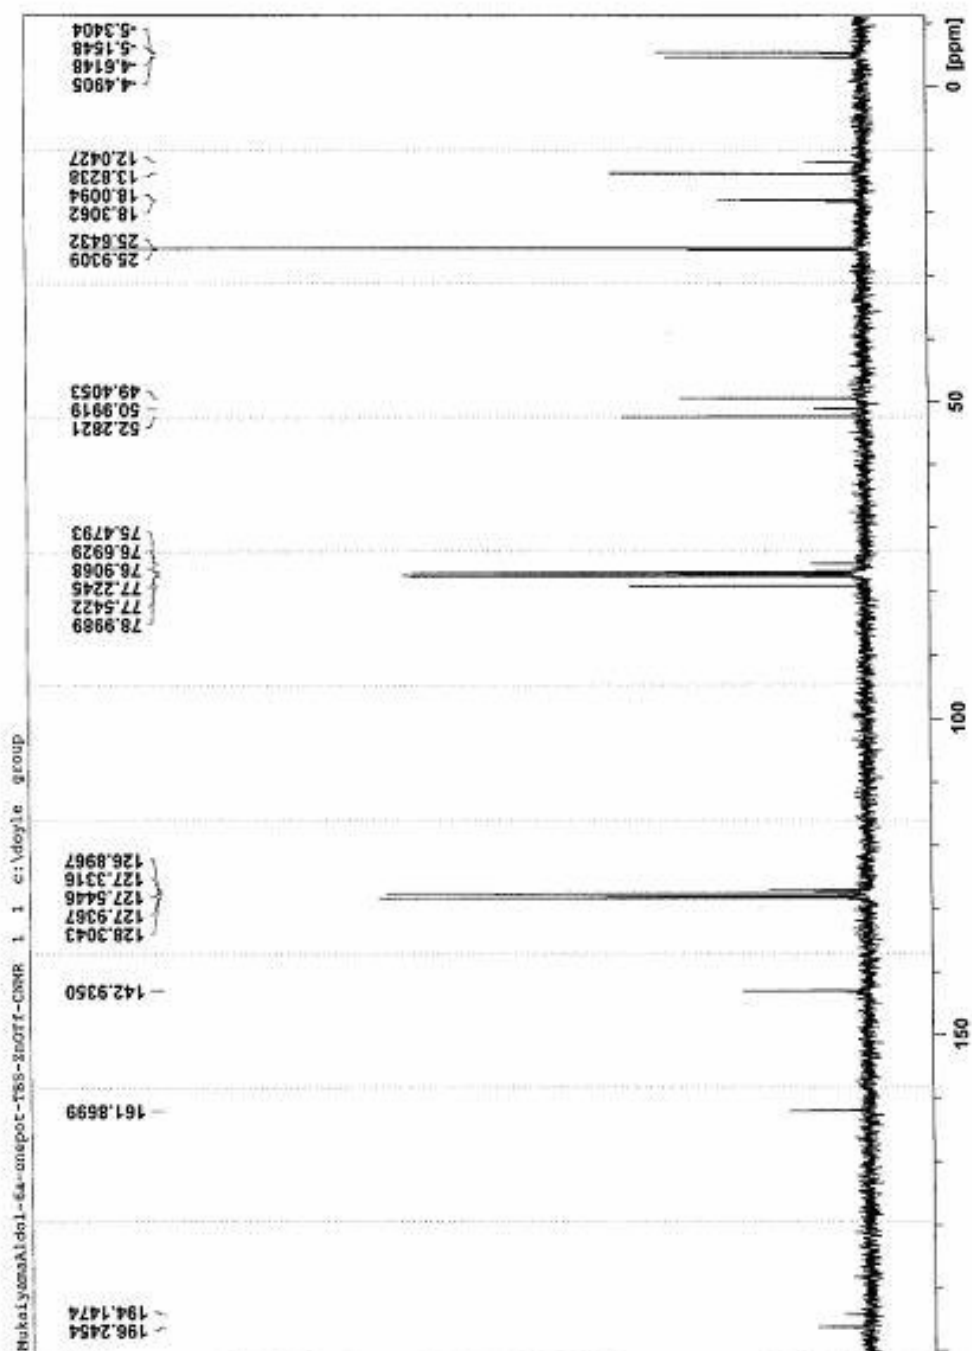



6c

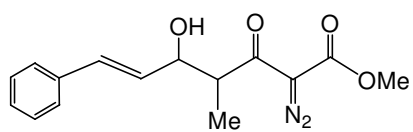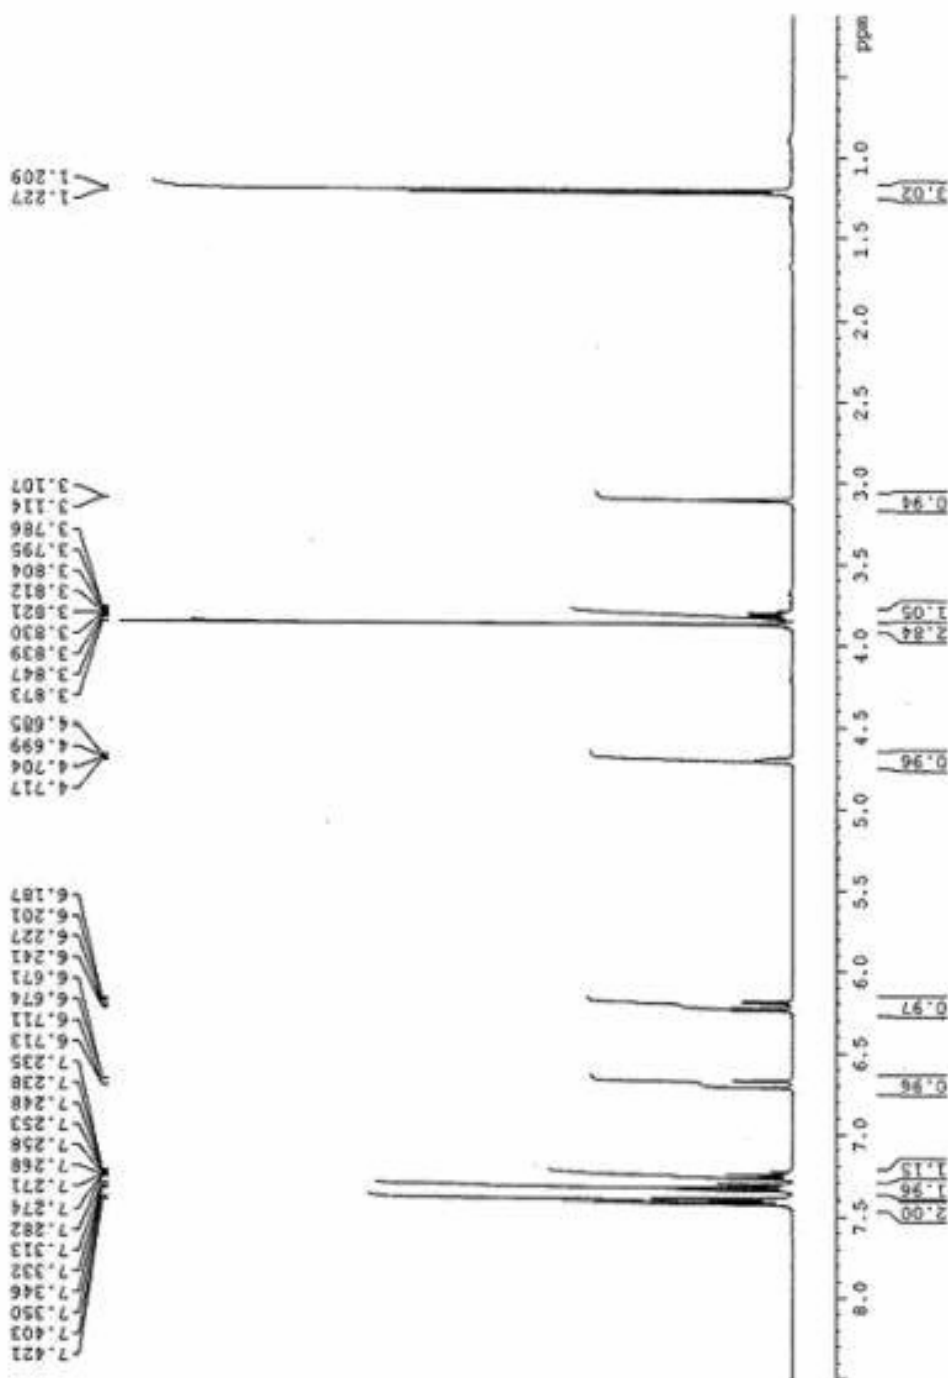

MukaiyamaAldol-6c-Bu2B-OC  
CDC13 101609



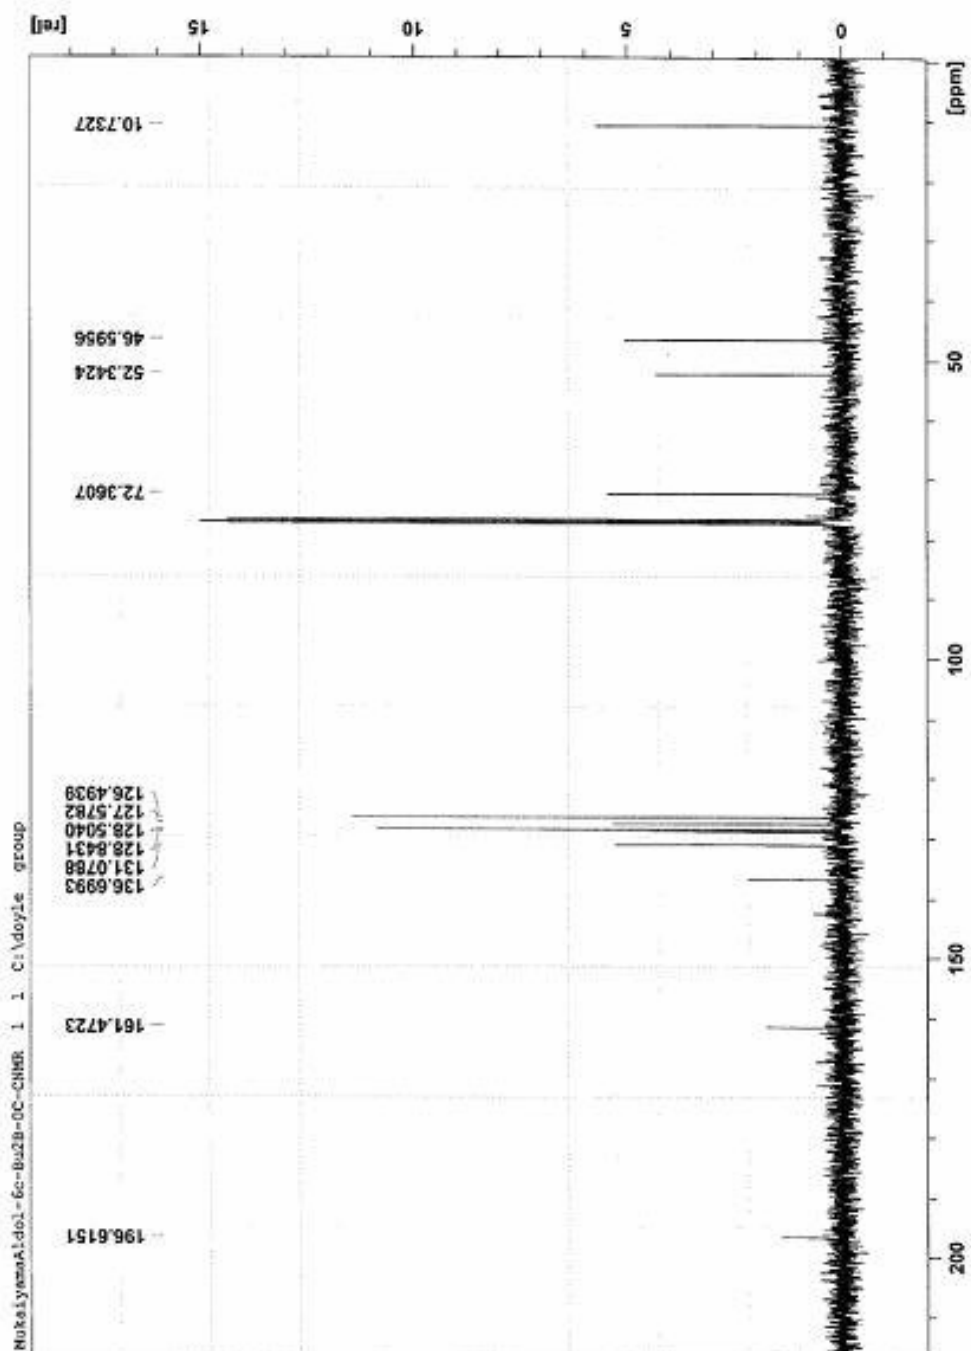



6h

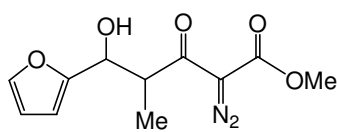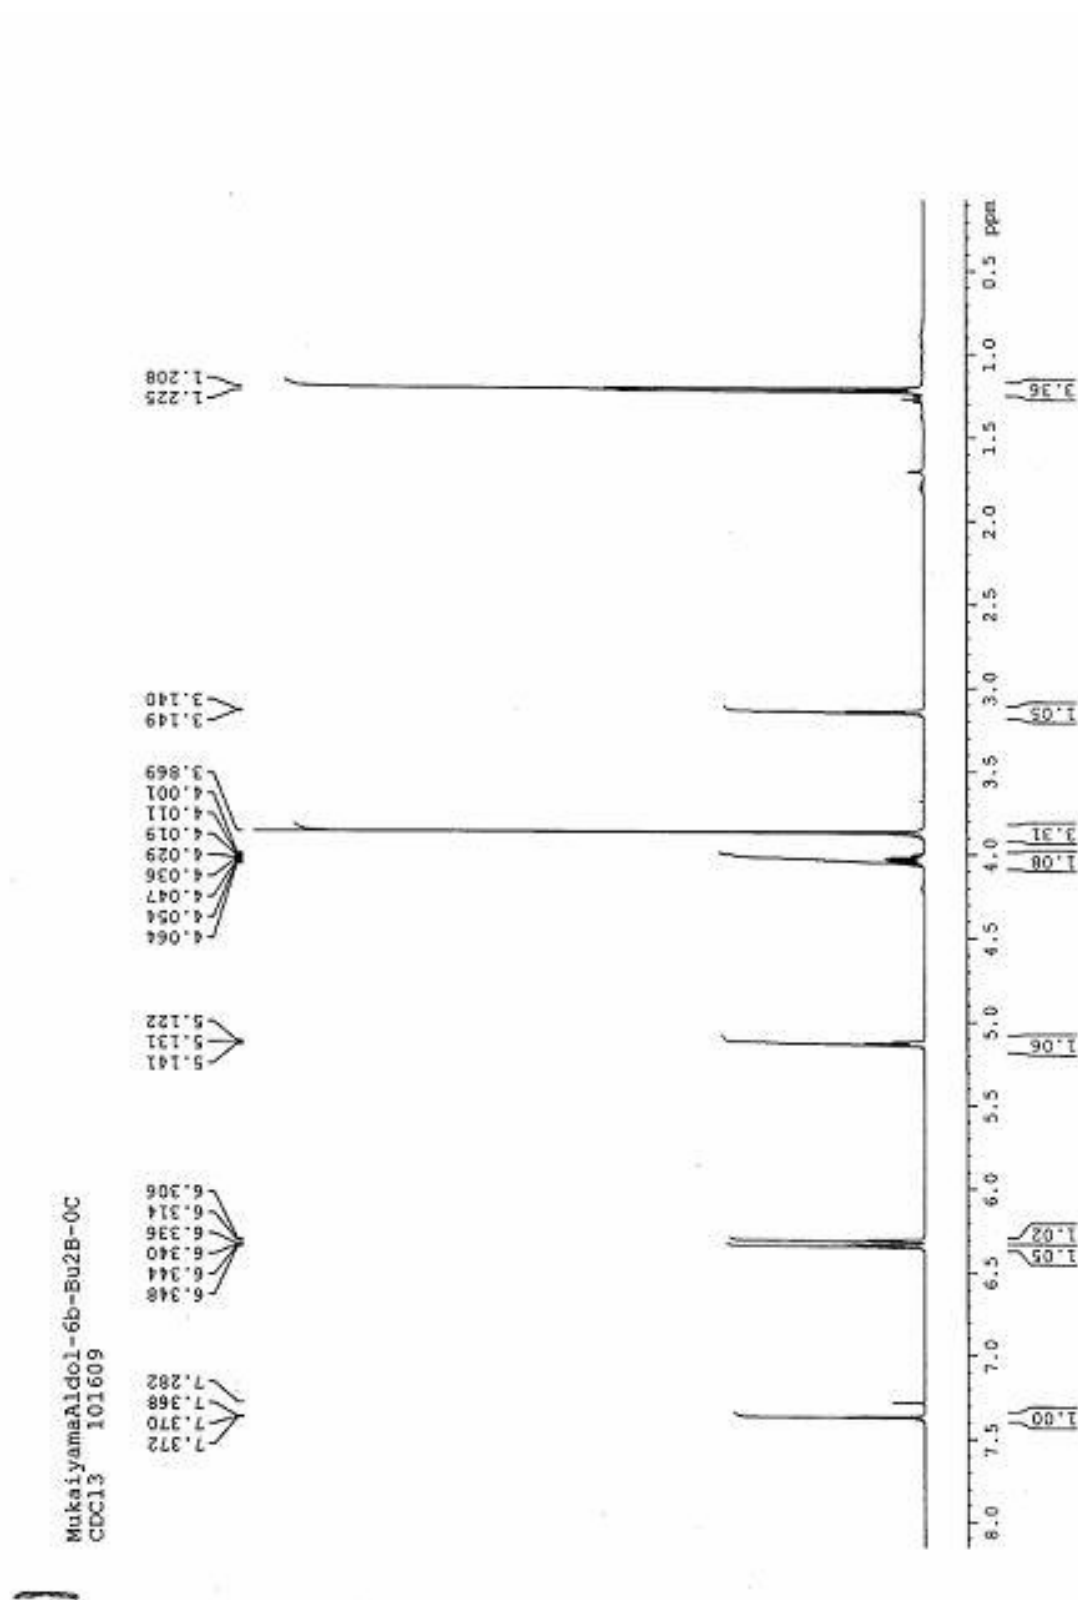



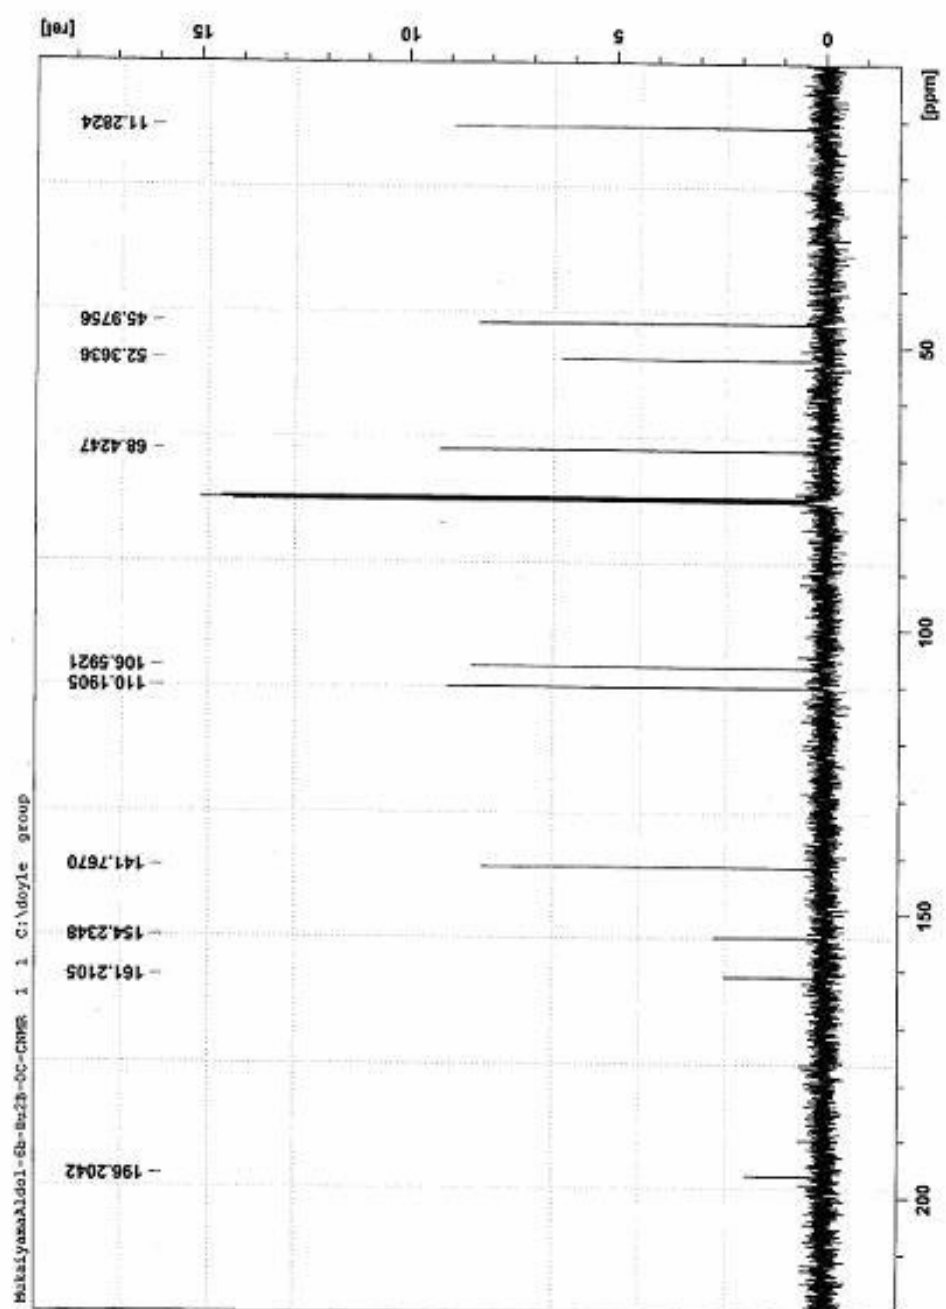



6i

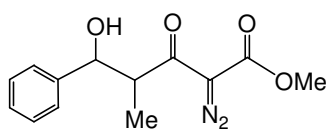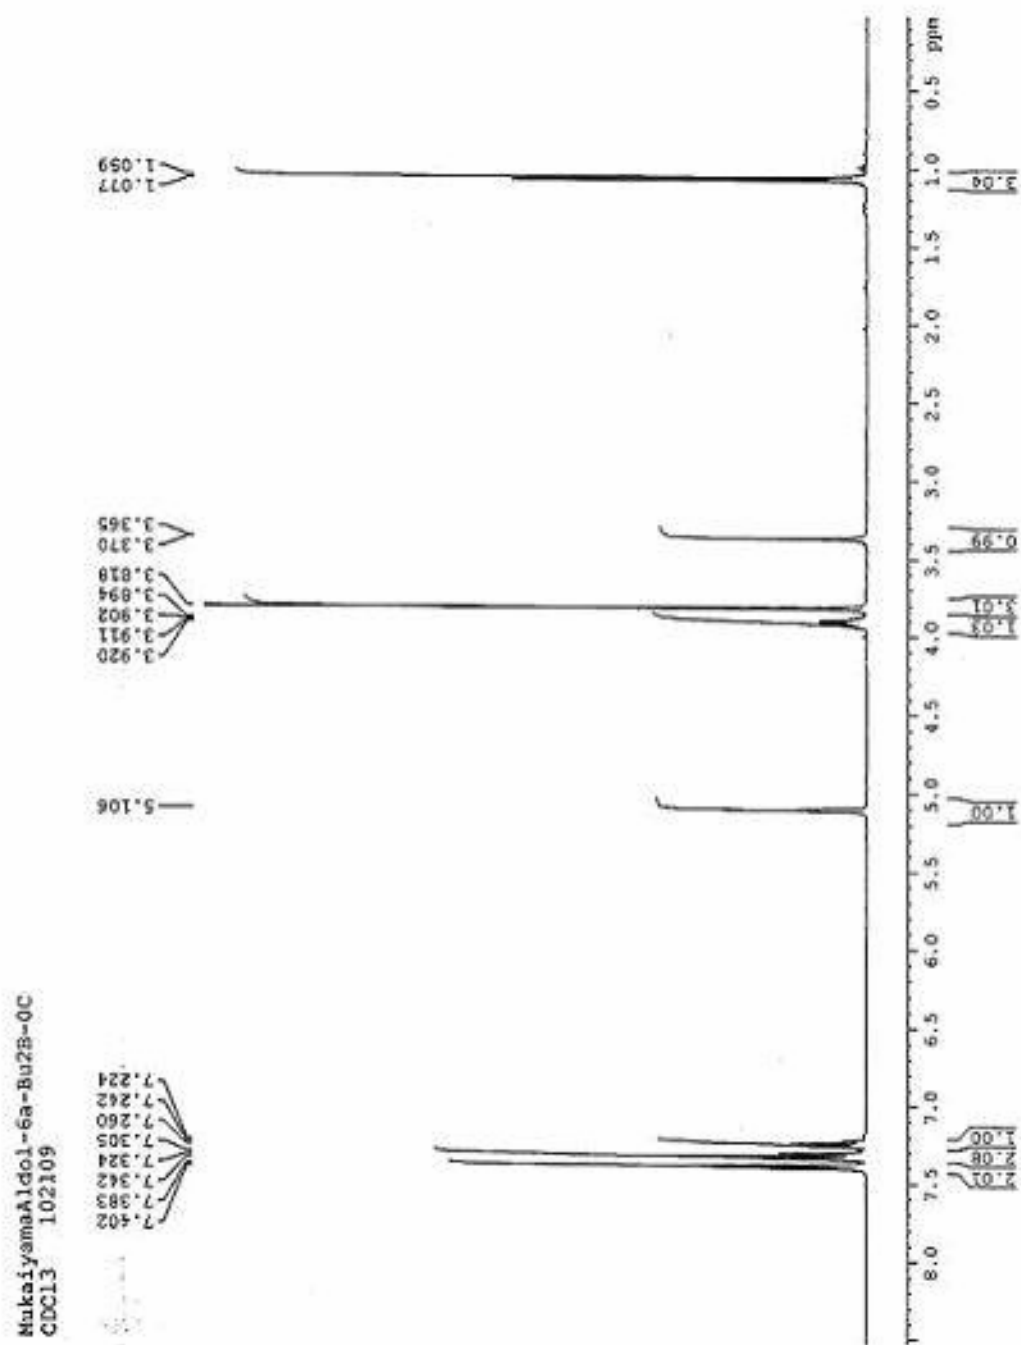



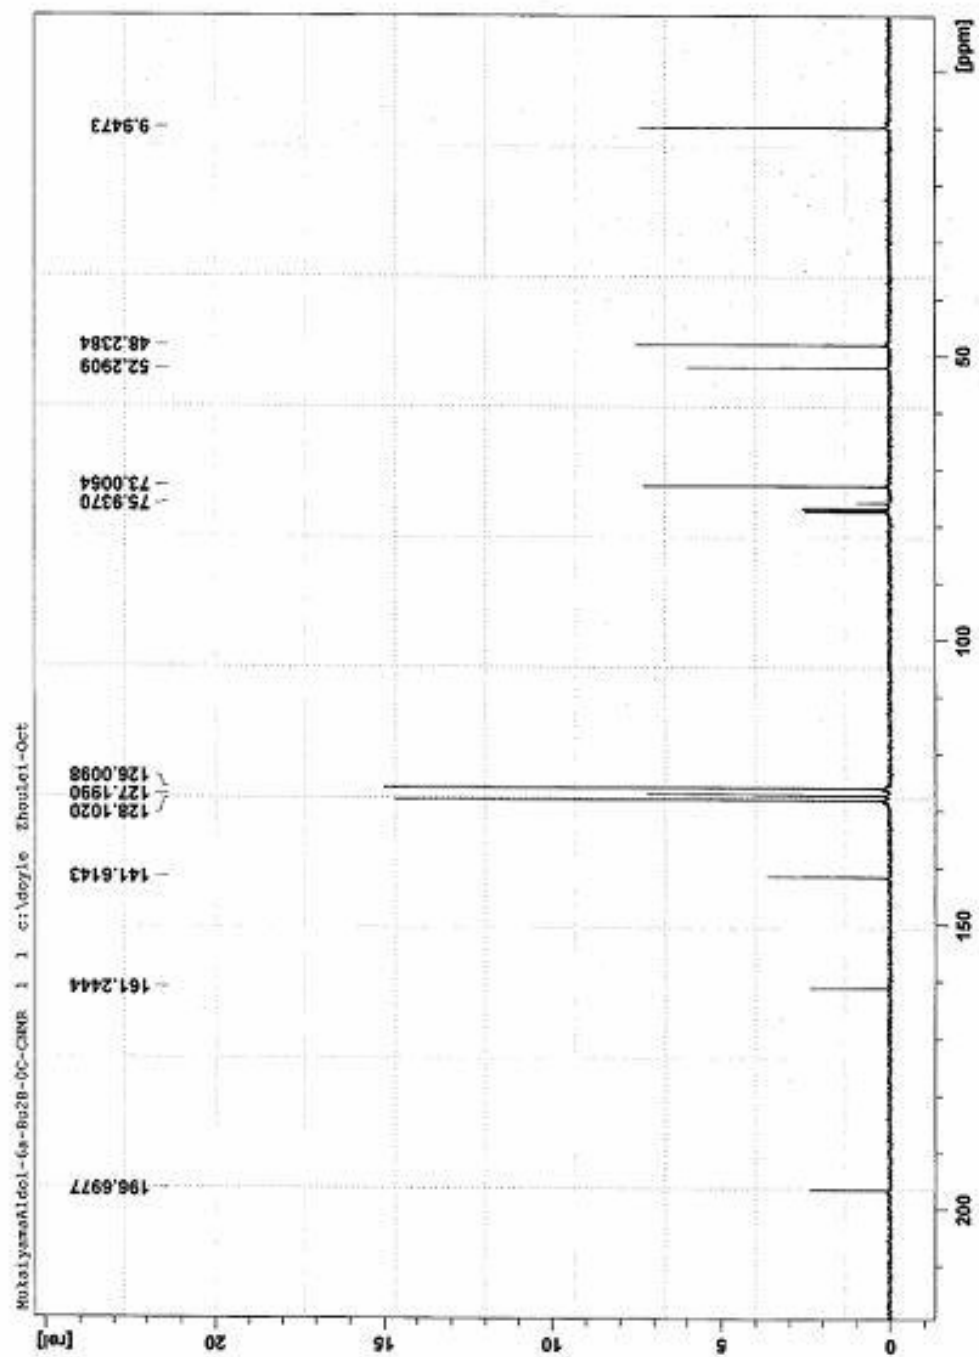



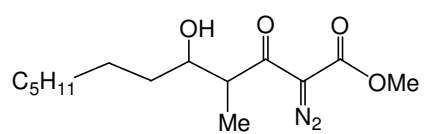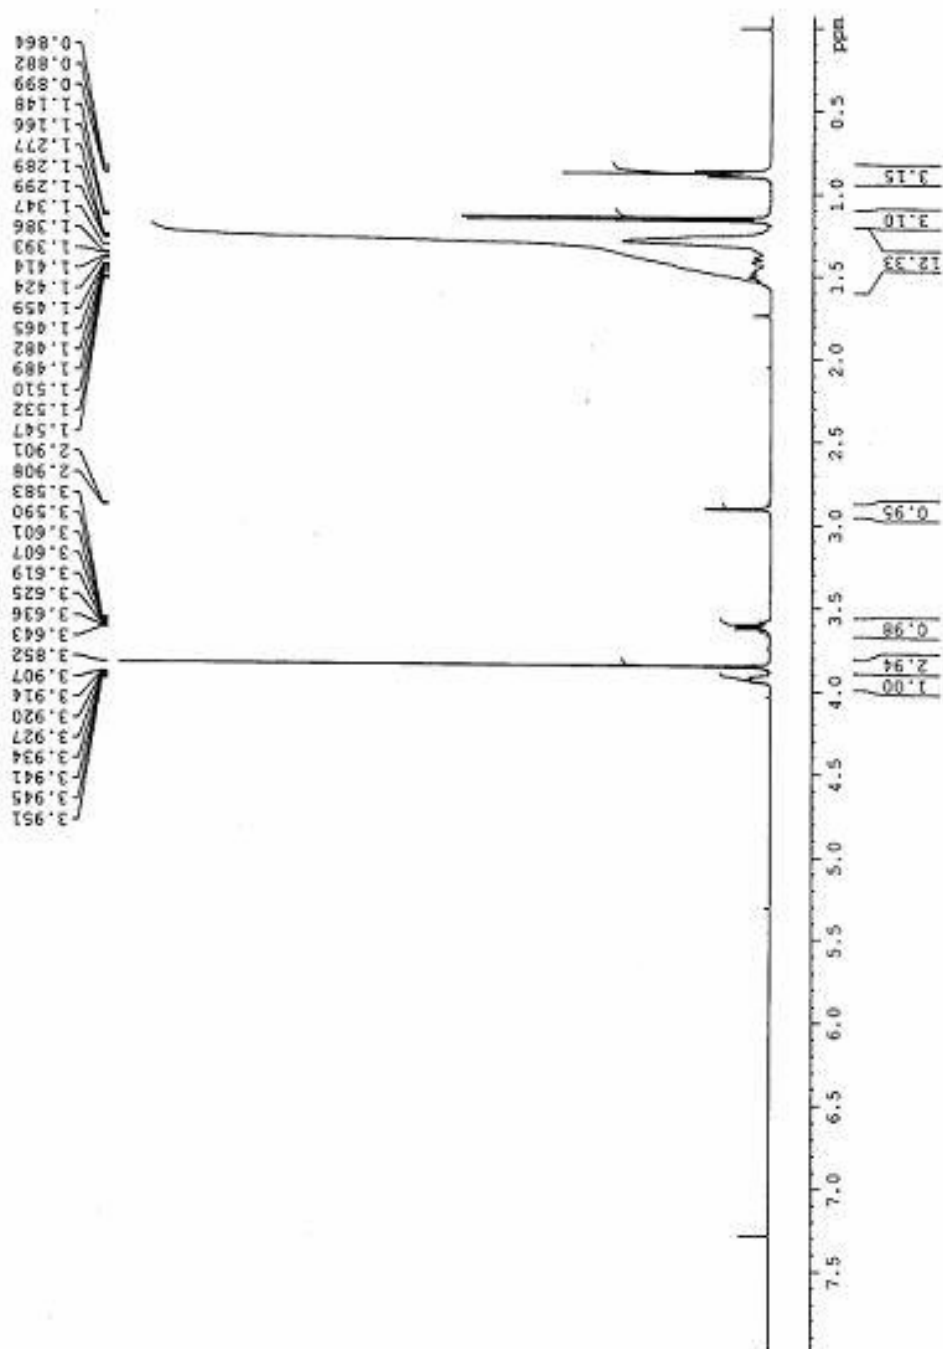

MukaiyamaAldol-6d-Bu2B-OC  
CDC13 102209



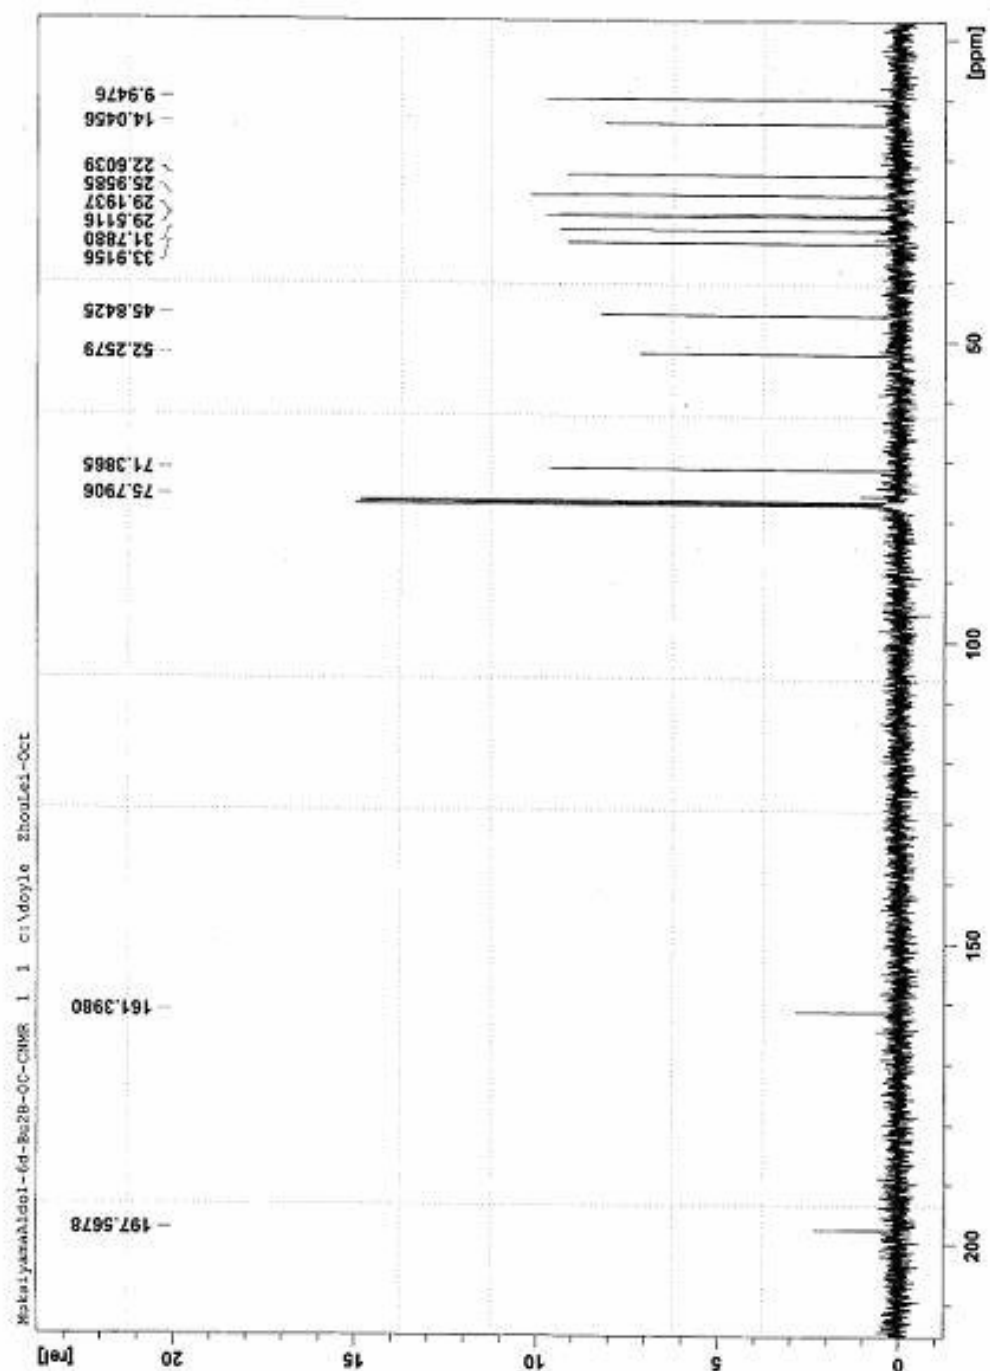



6m

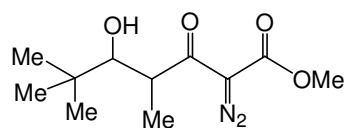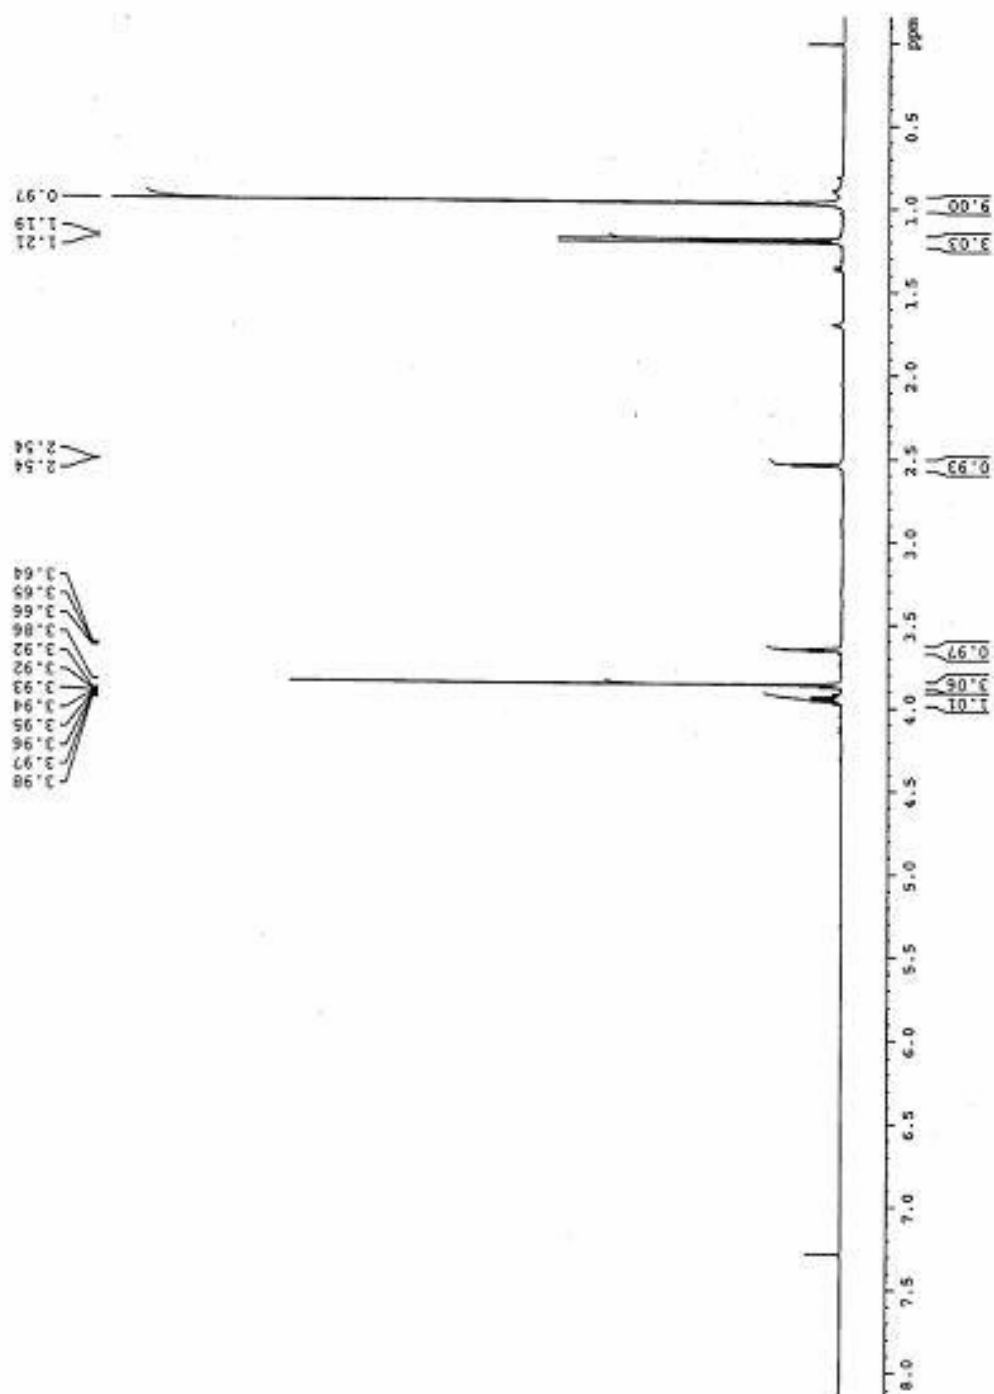

MukaiyamaAldol-6e-Bu2B-OC  
CDC13 102309



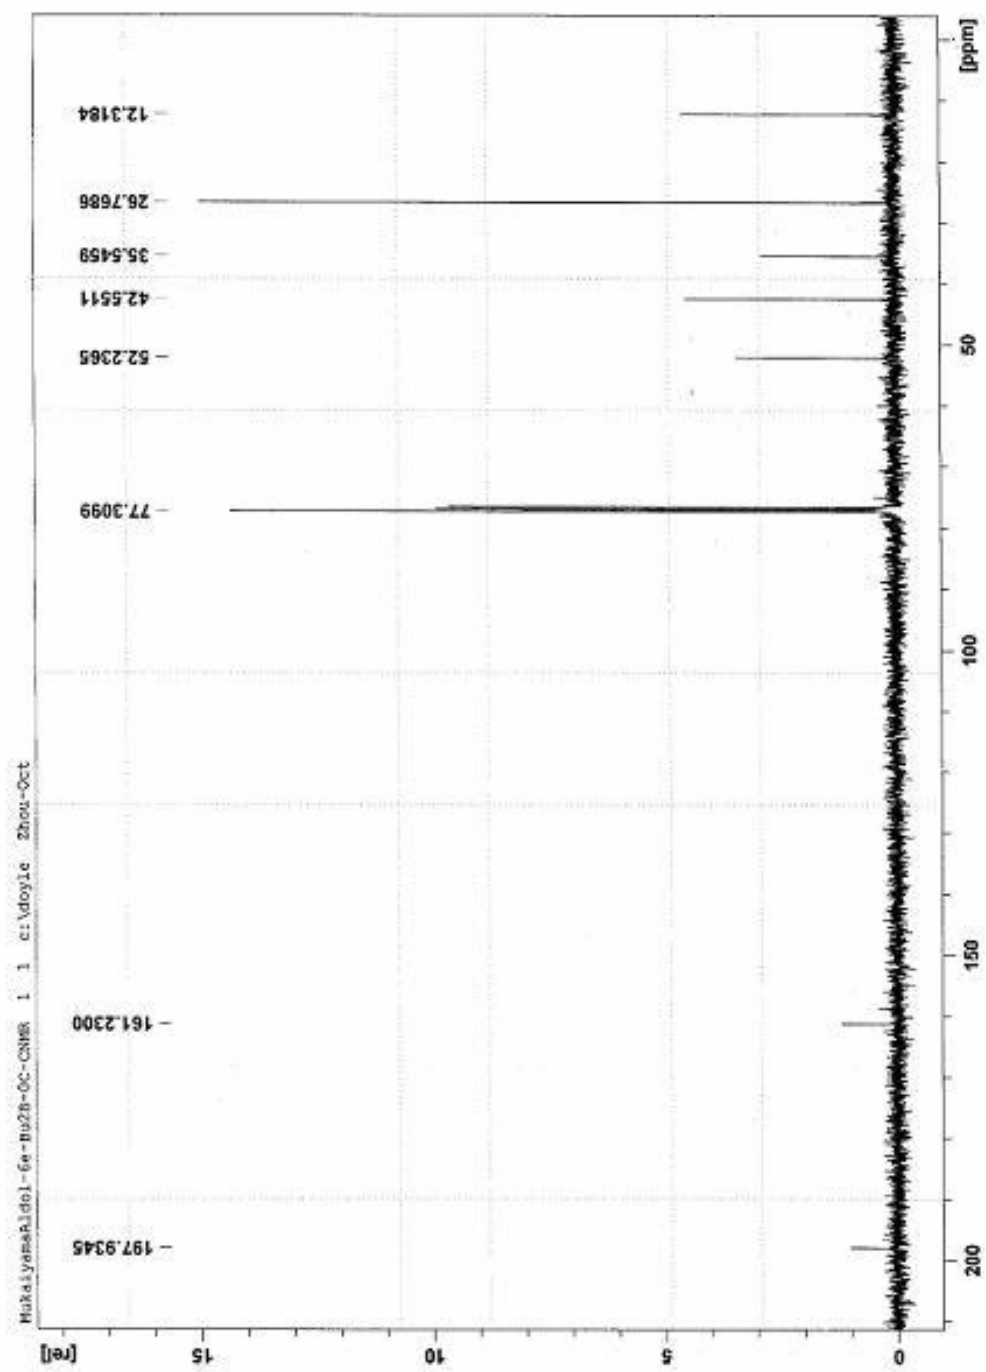



7 crude NMR: mixture of two diastereomers

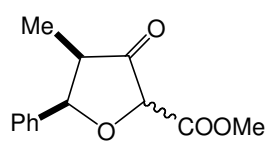

MukaiyamaAldol-6a-Rh2OAc4-crude  
CDCl3 110509

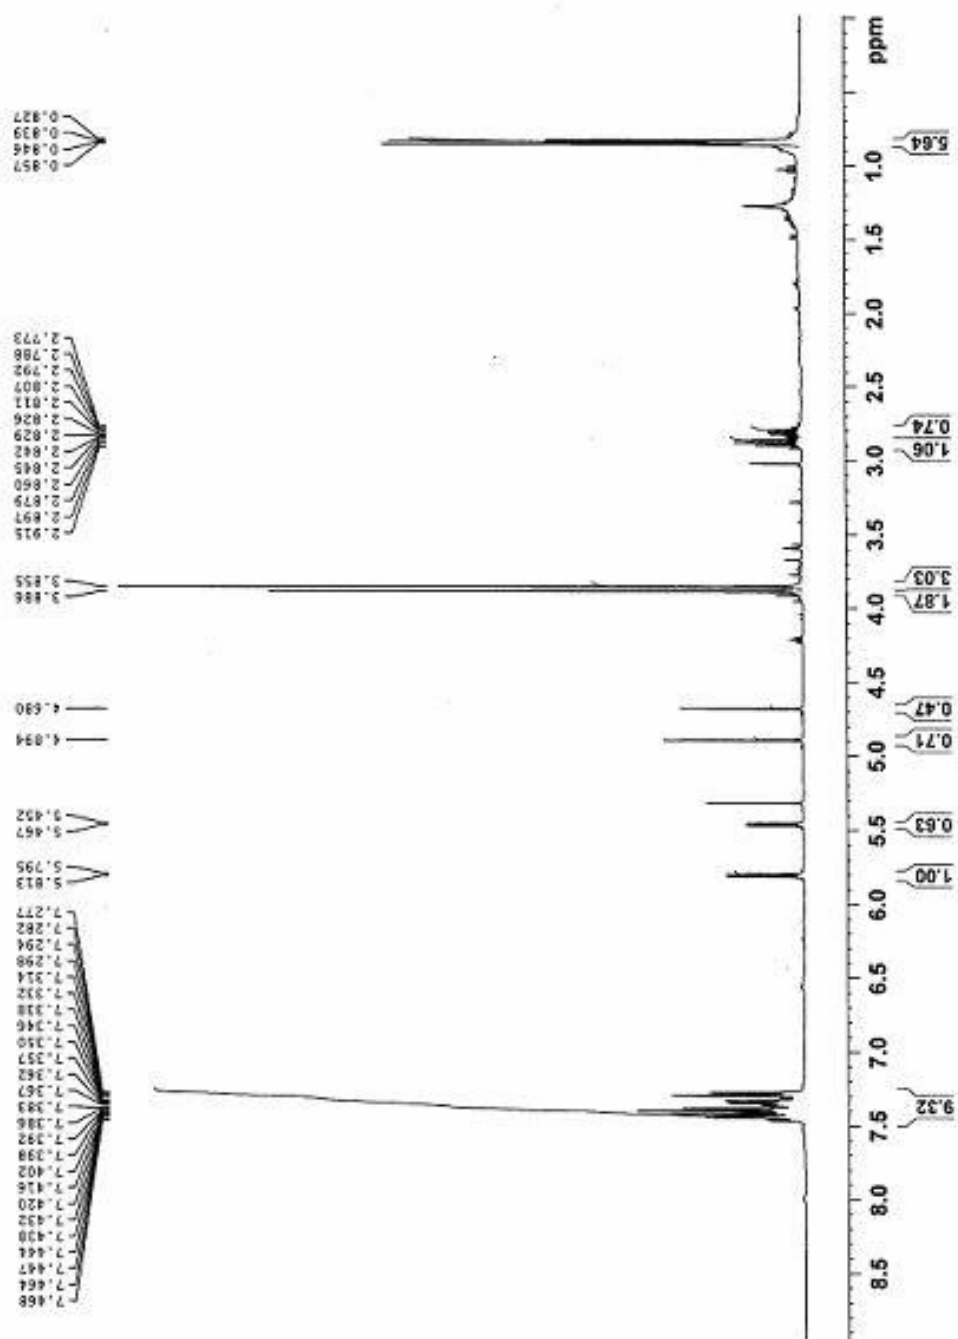



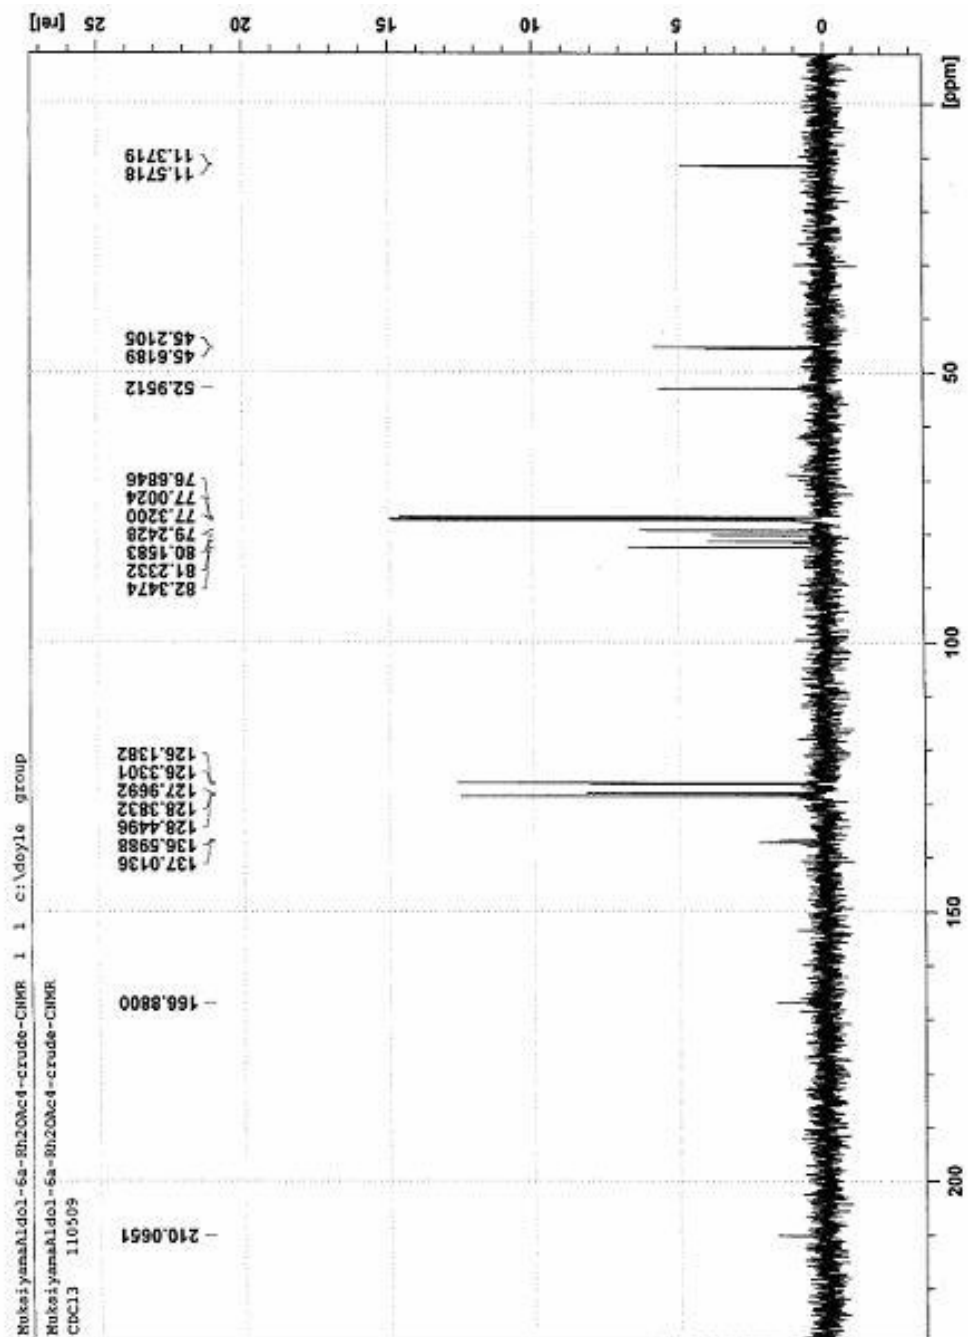

Supplement: Supplementary file 1 [file 4485253]
